# Supplementary material for: Directing group controlled regioselective C–H borylation of 2-arylphenolic compounds at room temperature
Source: Royal Society of Chemistry journal article supplement (doi:10.1039/d4qo00805g), 2024-01-01
Supplement: d4qo00805g1.pdf [file d4qo00805g1.pdf]

Electronic Supplementary Information for

**Directing group controlled regioselective C-H borylation of 2-  
arylphenolic compounds at room temperature**

Jiao Kang<sup>a</sup>, Jing Liu<sup>a</sup>, Zhilong Chen<sup>a\*</sup>

a. School of Pharmacy, Tongji Medical School, Huazhong University of Science and  
Technology, 13# Hangkong Road, Wuhan, China, 430030  
Email: pmchenzl@hust.edu.cn

## Table of content

|                                                                                                |     |
|------------------------------------------------------------------------------------------------|-----|
| I. General Information.....                                                                    | 3   |
| II. Starting material synthesis.....                                                           | 4   |
| III. General procedure for Fe(OTf) <sub>3</sub> promoted borylation of phenolic compounds..... | 7   |
| IV. Condition optimization.....                                                                | 8   |
| V. Synthetic application.....                                                                  | 11  |
| VI. Mechanism study.....                                                                       | 11  |
| VII. Analytical data of starting materials, intermediates and products.....                    | 12  |
| VIII. NMR spectrums of starting materials, intermediates and products.....                     | 42  |
| X. Reference.....                                                                              | 136 |

## I. General Information

Glassware and stir bars were dried in an oven at 70 °C for at least 12h and then cooled in a desiccator cabinet over Drierite prior to use. Optimization and substrate screen were performed in 20 mL vials. All other reactions were performed in round-bottom flasks sealed with rubber septa. Plastic syringes or pipets were used to transfer liquid reagents. Reactions were stirred magnetically using Teflon-coated, magnetic stir bars. Analytical thin-layer chromatography (TLC) was performed using glass plates pre-coated with 0.25 mm of 230–400 mesh silica gel impregnated with a fluorescent indicator (254 nm and 320 nm). TLC plates were visualized by exposure to ultraviolet light and/or exposure to  $\text{KMnO}_4$  stain (or phosphomolydic acid, PMA; cerium molybdate stain). Organic solutions were concentrated under reduced pressure using a rotary evaporator. Flash-column chromatography was performed on silica gel (300 or 400 mesh).

Nuclear magnetic resonance spectra were recorded at ambient temperature (unless otherwise stated) on Bruke 600 or 400 MHz spectrometers. All values for proton chemical shifts are reported in parts per million ( $\delta$ ) and referenced to the residual protium in  $\text{CDCl}_3$  ( $\delta$  7.26) (or  $\text{DMSO-D}_6$ ,  $\delta$  2.50). All values for carbon chemical shifts are reported in parts per million ( $\delta$ ) and referenced to the carbon resonances in  $\text{CDCl}_3$  ( $\delta$  77.0) (or  $\text{DMSO-D}_6$ , 39.52). NMR data are represented as follows: chemical shift, multiplicity (s = singlet, d = doublet, t = triplet, q = quartet, quin = quintet, m = multiplet, b = broad), coupling constant (Hz), and integration. Infrared spectroscopic data is reported in wavenumbers ( $\text{cm}^{-1}$ ). High-resolution mass spectra (HRMS) were obtained using a liquid chromatography-electrospray ionization and time-of-flight mass spectrometer.

All the starting materials, catalysts and ligands, including (hetero)aryl halides, (hetero)aryl boronic acids, Pd-catalyst, ligands, bis(pinacolato)diboron, base, Lewis acids and tribromoborane, are commercially available.

## II. Starting material synthesis

**II-1.** Compounds **1c–1f**, **1j**, **1u** and **5a–5d** were prepared according to following procedure.

To the mixture of aryl bromide (**S1**, 5.0 or 2.5 mmol, 1.0 equivalent), phenyl boronic acid (**S2a**, 1.5 equivalents), Pd(dba)<sub>2</sub> (4 mol%), Xphos (5 mol%), K<sub>3</sub>PO<sub>4</sub> (3.0 equivalents) in a round flask under argon balloon was added dioxane/H<sub>2</sub>O (20 mL/2mL). Next, the mixture was heated at around 90°C for 12h. The reaction mixture was then cooled room temperature, diluted to with EtOAc (around 100 mL), washed by H<sub>2</sub>O (30 mL), NH<sub>4</sub>Cl (30 mL) and brine (30 mL), and dried by Na<sub>2</sub>SO<sub>4</sub>. After filtration and concentration in vacuum, the crude product was purified by silica gel column to afford desired biphenyl product **1** (**Scheme S1**).

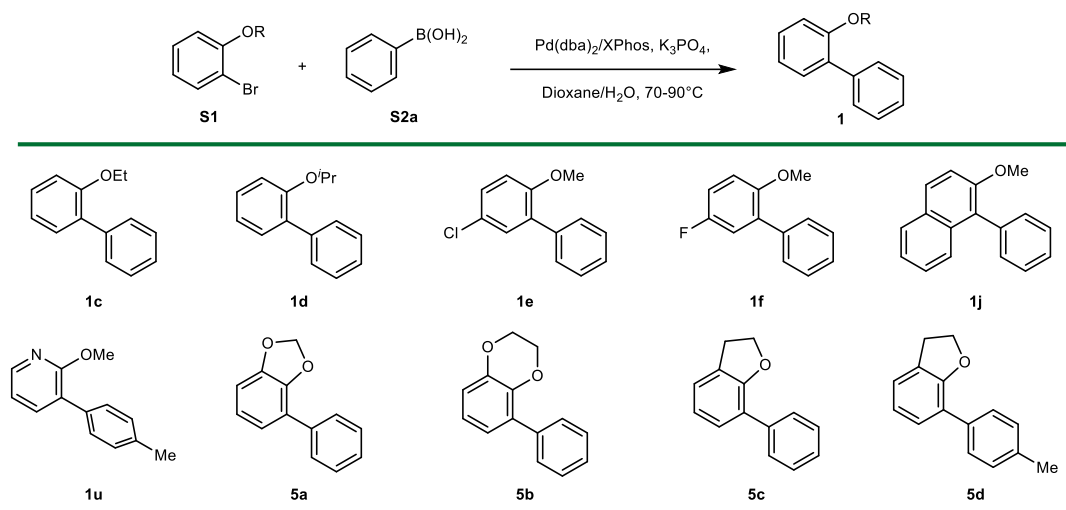

**Scheme S1.** Preparation of starting material **1c–1f**, **1j**, **1u**, and **5a–5d**

**II-2.** Compound **1k–1x** were prepared according to following procedure

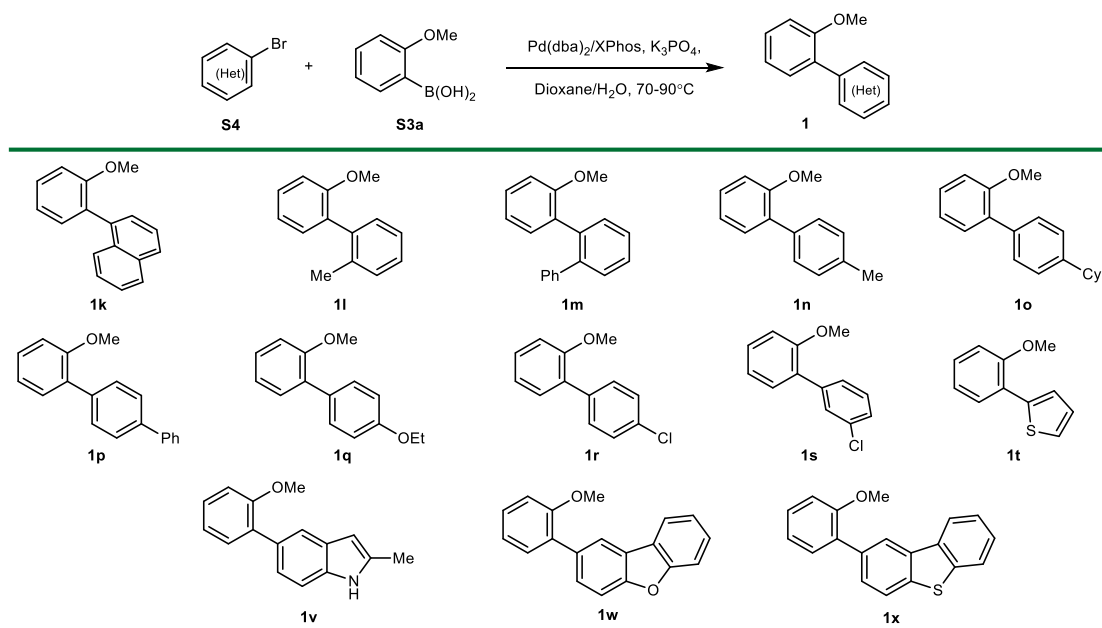

**Scheme S2.** Preparation of starting material **1k–1x**



To the mixture of aryl boronic acid (**S3**, 5.0 mmol, 1.0 equivalent), (hetero)aryl boronide (**S4**, 7.5 mmol, 1.5 equivalents), Pd(dba)<sub>2</sub> (4 mol%), Xphos (5 mol%) (or Pd(dba)<sub>2</sub> 2 mol%, PPh<sub>3</sub> 10 mol% for **1r**, **1s**), K<sub>3</sub>PO<sub>4</sub> (3.0 equivalents) in a round flask under argon balloon was added dioxane/H<sub>2</sub>O (20 mL/2mL). Next, the mixture was heated to 90°C for 12h. The reaction mixture was cooled room temperature, diluted to with EtOAc (around 100 mL), washed by H<sub>2</sub>O (30 mL), NH<sub>4</sub>Cl (30 mL) and brine (30 mL), and then dried by Na<sub>2</sub>SO<sub>4</sub>. After filtration and concentration, the crude product was purified by silica gel column to afford desired biphenyl product **1** (**Scheme S2**).

**II-3** Compounds **7a–7m**, **7u**, **7v** and **7w** were prepared according to following procedure

To a dry flask with NaH (10 mmol, 2.0 equivalents) under argon balloon was added DMA (5 or 10 mL) at room temperature at 0°C. After stirring around 5 min, phenol (**S5**, 5.0 or 10 mmol, 1.0 equivalent) in DMA (5 or 10 mL) was added slowly at 0°C and continue stirring for around 1 h until no gas generated, followed by adding acyl chloride (**S6**) dropwise. Next, the reaction mixture was stirring from 0°C to room temperature for overnight, and quenched by adding H<sub>2</sub>O (5 mL) dropwise in the open air. The resulted mixture was then diluted with EtOAc (100 mL), washed by H<sub>2</sub>O (30 mL×3), brine (30 mL), and dried by Na<sub>2</sub>SO<sub>4</sub>. The desired product **7** was obtained after filtration, concentration and purification by silica gel column (**Scheme S3**).

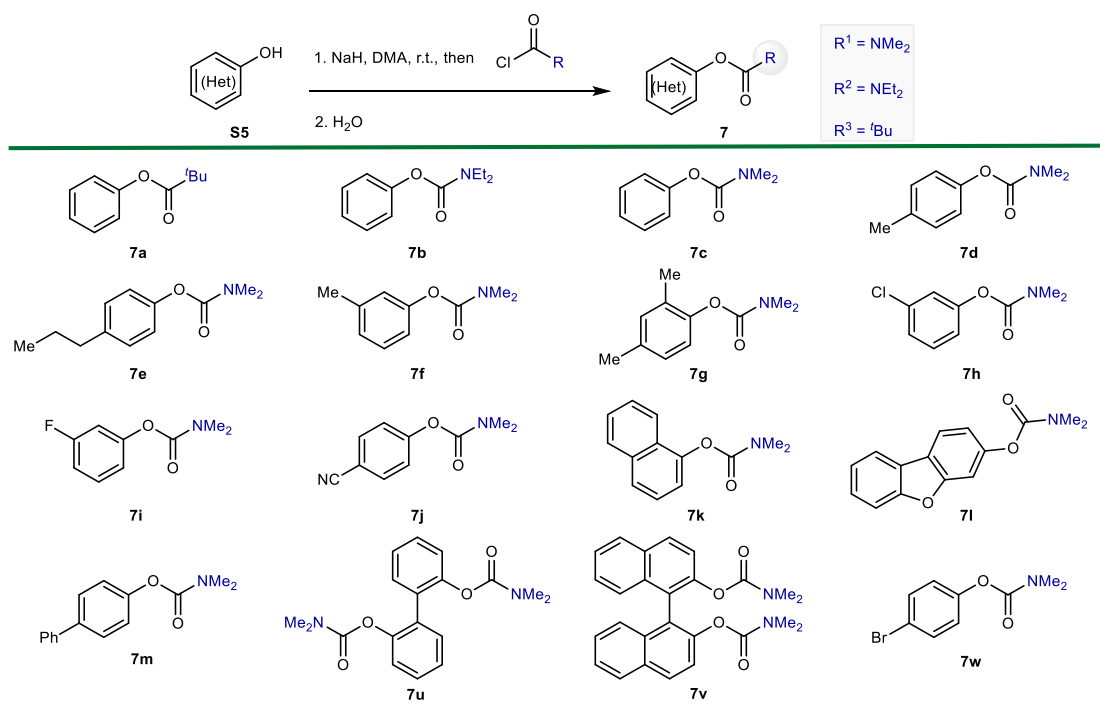

**Scheme S3.** Preparation of starting materials **7a–7m**, **7u**, **7v** and **7w**

**II-4** Compounds **7m–7o** and **7q–7s** were prepared similarly as described in **Scheme S1** with aryl halides were compounds **7h** and **7w** (3.0 mmol scale, 1.0 equivalent), aryl boronic acid (**S2**, 1.5 equivalents), Pd(dba)<sub>2</sub> (4 mol%) and XPhos (5 mol%) in dioxane/H<sub>2</sub>O (10 mL/1mL) at 90°C for overnight (**Scheme S4**).

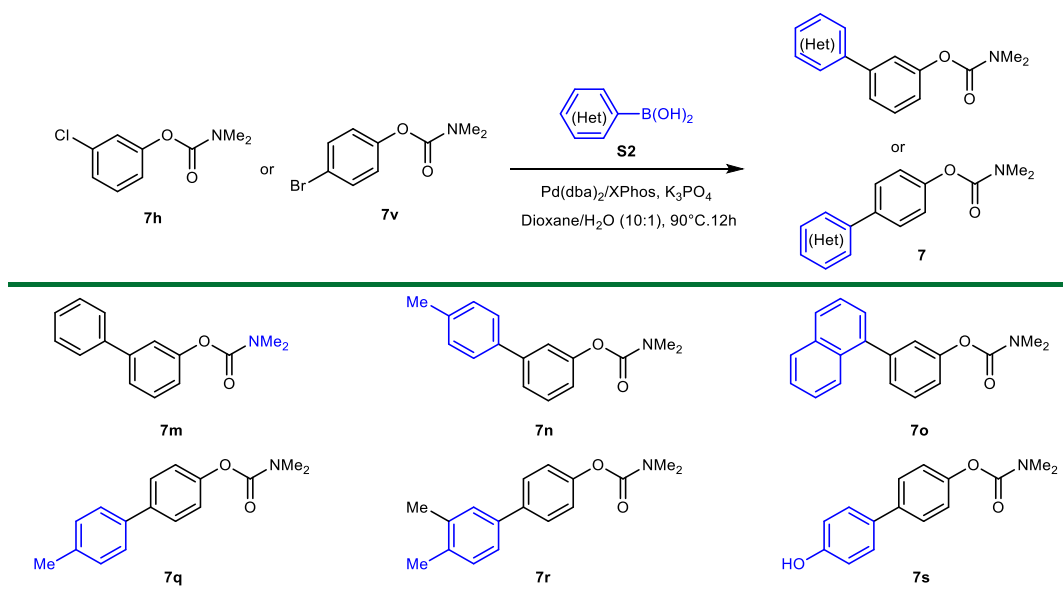

**Scheme S4.** Preparation of starting material **7l-7n**, and **7p-7r**

**II-5** Compound **1g** was prepared according to following procedure from compound **1a**.

To the mixture of compound **1a** (851 mg, 5.0 mmol, 1.0 equivalent),  $\text{Na}_2\text{WO}_4 \cdot 2\text{H}_2\text{O}$  (165 mg, 5 mol%) and NaBr (515 mg, 5.0 mmol, 1.0 equivalents) in 100 mL flask was added EtOH (15 mL), followed by adding oxalic acid (900 mg, 10.0 mmol, 2.0 equivalent) and  $\text{H}_2\text{O}_2$  (35% aq., 0.476 mL, 1.1 equivalents) in the open air. Next, the reaction mixture as stirred at room temperature for overnight until no **1a** left. The resulting mixture was diluted with EtOAc (around 100 mL), washed by  $\text{H}_2\text{O}$  (50 mL $\times$ 2) and brine (50 mL). The organic layer was then dried by  $\text{Na}_2\text{SO}_4$ , and removed the solvents after filtration. The desired product was obtained as colorless solid (quantitative yield, 1.29g, with trace byproduct) (Scheme S5).

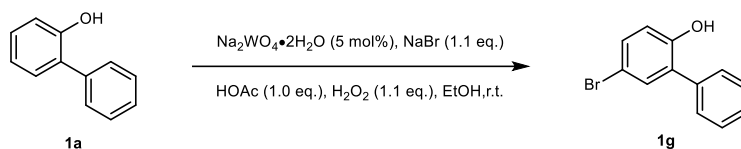

**Scheme S5.** Preparation of starting material **1g**

### III. General procedure for Lewis acid promoted borylation of phenolic compounds

#### III-1. General procedure for Fe(OTf)<sub>3</sub> catalyzed borylation of 2-arylphenolic compounds

To the mixture of 2-arylphenolic compound (**1** or **5**, 0.5 mmol, 1.0 equivalent) and Fe(OTf)<sub>3</sub> (10 mol%) was added anhydrous DCM (2 or 2.5 mL) under argon balloon, followed by adding BBr<sub>3</sub> (2.0 M in DCM, 0.75 mL) at room temperature. Next, the reaction mixture was stirring at room temperature for 12h, quenched by adding H<sub>2</sub>O in the open air, and diluted with EtOAc (around 50 mL). The resulted reaction mixture was then washed with H<sub>2</sub>O (10 mL×2), brine (10 mL), and dried by Na<sub>2</sub>SO<sub>4</sub>. The desired product **2** or **6** was isolated by silica gel column of the crude product after removing all the solvents (**Scheme S6**).

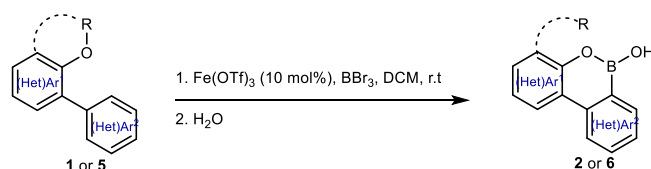

**Scheme S6.** Fe(OTf)<sub>3</sub> catalyzed directed borylation of 2-arylphenolic compounds

#### III-2. General procedure for Fe(OTf)<sub>3</sub> catalyzed directed *ortho*-borylation of phenol

To the mixture of aryl dimethyl carbamate (**7**, 0.5 mmol, 1.0 equivalent) and Fe(OTf)<sub>3</sub> (10 mol%) was added anhydrous DCM (2.0 mL) under argon balloon, followed by adding BBr<sub>3</sub> (2.0 in DCM, 0.75 mL) at room temperature. Next, the reaction mixture was stirring at room temperature for 12h, followed by being quenched by H<sub>2</sub>O in the open air and diluted with EtOAc (around 50 mL). The resulted reaction mixture was then washed with H<sub>2</sub>O (10 mL×2), brine (10 mL), and dried by Na<sub>2</sub>SO<sub>4</sub>. The desired product **8** was obtained as crude product, and then dissolved in anhydrous DCM (2.0 mL) followed by adding NEt<sub>3</sub> (1.5 mmol, 3.0 equivalents) and pinacol (1.1 mmol, 2.2 equivalents). The reaction mixture continued stirring for overnight and then diluted with EtOAc (around 50 mL). The resulting solution was washed with H<sub>2</sub>O (10 mL), Na<sub>2</sub>CO<sub>3</sub> (aq., 10 mL×2), brine (10 mL), and dried by Na<sub>2</sub>SO<sub>4</sub>. The desired boronic ester **14** was obtained after filtration and purified by silica gel column. Notably, products **8j** and **8k** were isolated as boronic acids without further transformation into boronic ester (**Scheme S7**).

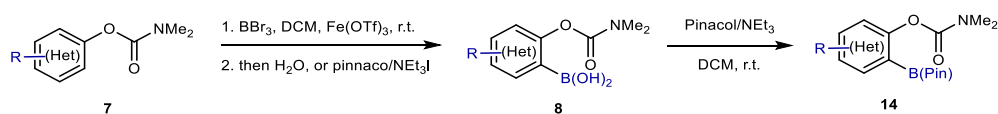

**Scheme S7.** Fe(OTf)<sub>3</sub> catalyzed directed *ortho*-borylation of aryl dimethyl carbamate

#### III-3. Dual directing effects

For substrate **3a**, the dual directed borylation was performed as described in **Scheme S6** (**Scheme S8**).

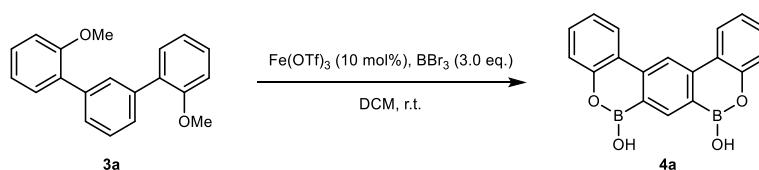

**Scheme S8.** Borylation of 2,2''-dimethoxy-1,1':3,1''-terphenyl

## IV. Condition optimization

### IV-1. Borylation of 2-phenylphenol

**Table S1.** Condition optimization for directed borylation of 2-phenylphenol

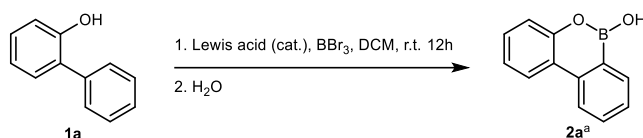

| Entry | Lewis acid (mol%)         | BBr <sub>3</sub> (equivalents) | Conversion (%) | Yield (%) |
|-------|---------------------------|--------------------------------|----------------|-----------|
| 1     | none                      | 3.0                            | 0              | 0         |
| 2     | AlCl <sub>3</sub> (10)    | 3.0                            | 100            | 47        |
| 3     | AlBr <sub>3</sub> (10)    | 3.0                            | 100            | 53        |
| 4     | Al(OTf) <sub>3</sub> (10) | 3.0                            | 66             | 66        |
| 5     | GaCl <sub>3</sub> (10)    | 3.0                            | 93             | 82        |
| 6     | InCl <sub>3</sub> (10)    | 3.0                            | 100            | 97        |
| 7     | Fe(OTf) <sub>3</sub> (10) | 3.0                            | 100            | 99        |
| 8     | NbCl <sub>5</sub> (10)    | 3.0                            | 30             | 30        |
| 9     | YCl <sub>3</sub> (10)     | 3.0                            | 0              | 0         |
| 10    | Sc(OTf) <sub>3</sub> (10) | 3.0                            | 10             | 10        |

a. all the reactions were performed with **1a** (0.5 mmol, 1.0 equivalent), LA-catalyst (10 mol%) and BBr<sub>3</sub> (3.0 equivalent) in DCM at room temperature (20-30°C) for 12h. The conversion and yield were determined by <sup>1</sup>H-NMR of crude product. The reactions were clean, only desired product and starting material were observed.

### IV-2. Directed *ortho*-borylation of phenolic carbamate

**Table S1.** Condition optimization for *ortho*-borylation of phenolic ester and carbamate

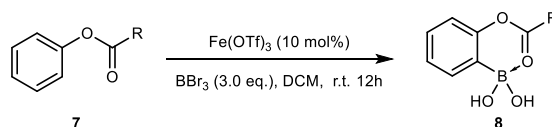

| Entry          | R                               | Ratio by H-NMR |          |           |                                  |
|----------------|---------------------------------|----------------|----------|-----------|----------------------------------|
|                |                                 | <b>8</b>       | <b>9</b> | <b>10</b> | other byproducts                 |
| 1              | — <sup>t</sup> Bu ( <b>7a</b> ) | N.O.           | N.O.     | N.O.      | <b>11a</b> : <b>13a</b> = 1:0.18 |
| 2              | —NMe <sub>2</sub> ( <b>7b</b> ) | 1              | 0.11     | N.O.      | unkonwn byproduct (0.07)         |
| 3              | —NEt <sub>2</sub> ( <b>7c</b> ) | 1              | 0.10     | N.O.      | unkonwn byproduct (0.10)         |
| 4 <sup>a</sup> | —NMe <sub>2</sub> ( <b>7b</b> ) | 1              | 0.17     | N.O.      | unkonwn byproduct (0.09)         |

N. O. = not observed, a. without Fe(OTf)<sub>3</sub>

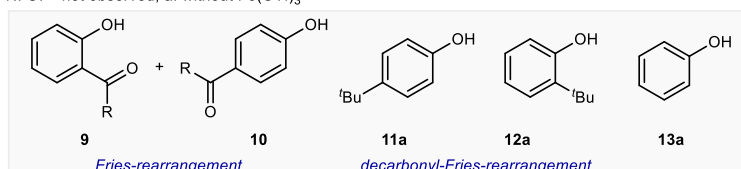

a. all the reactions were performed with **7** (0.5 mmol, 1.0 equivalent), Fe(OTf)<sub>3</sub> (10 mol%) and BBr<sub>3</sub> (3.0 equivalent) in DCM at room temperature (20-30°C) for 12h. The ratio of products was determined by <sup>1</sup>H-NMR of crude products.



K-6-16B.1.fid

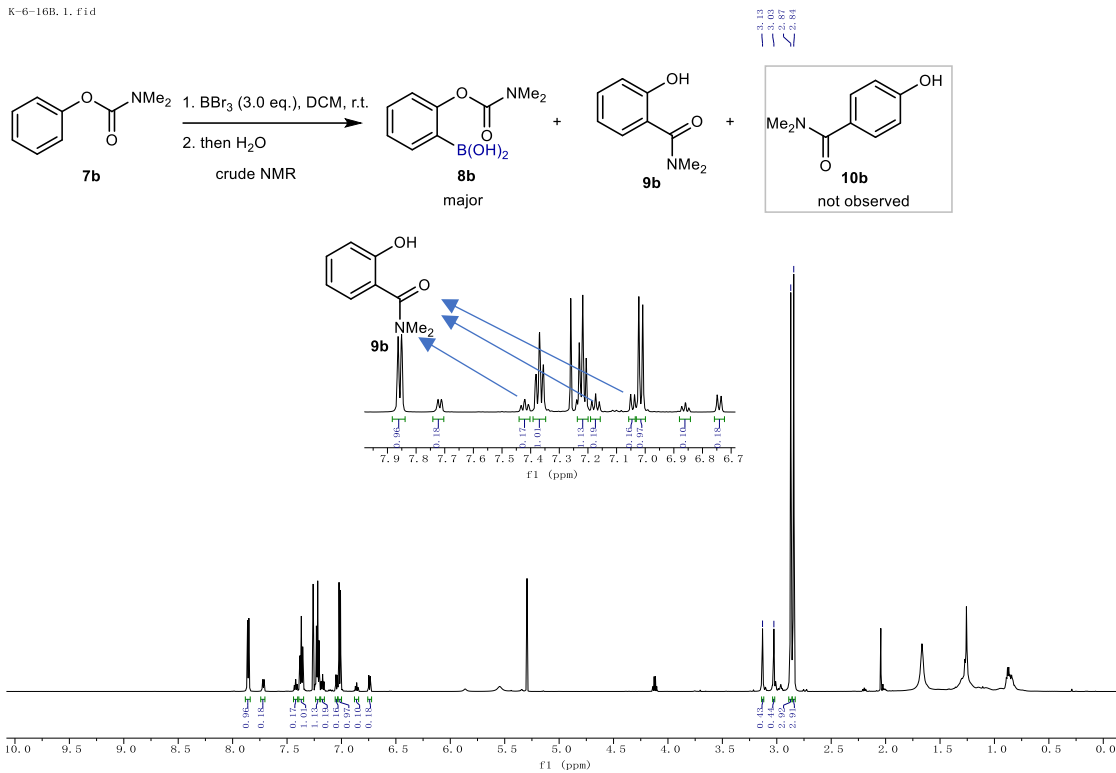

K-6-96.1.fid

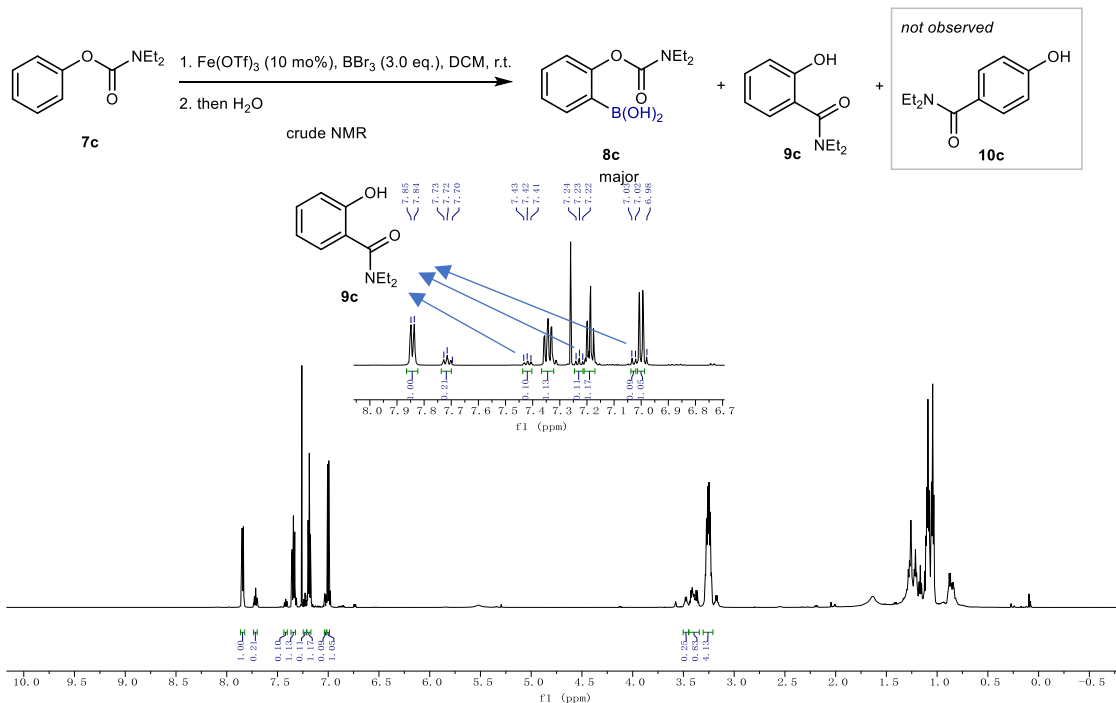

## V. Synthetic application

### V-1. Suzuki coupling of 6H-dibenzo[*c,e*][1,2]oxaborinin-6-ol (**2a**)

The Suzuki coupling was performed similarly as described in **Scheme S1** with compound **2a** (98.1 mg, 0.5 mmol), Pd(dba)<sub>2</sub> (4 mol%), XPhos (5 mol%) and K<sub>3</sub>PO<sub>4</sub> (1.5 mmol, 3.0 equivalents) in dioxane/H<sub>2</sub>O (2/0.2 mL) at 90°C for 16h (**Scheme S9**).

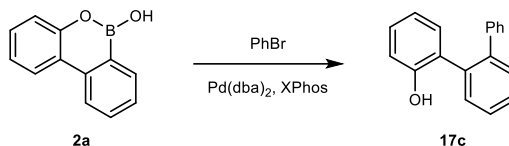

**Scheme S9.** Borylation of [1,1':3',1''-terphenyl]-2'-ol

### V-2. *Ips*o-hydroxylation of products

To the solution of compound **2l** (113.6 mg, 0.47 mmol) or **14e** (142.3 mg, 0.43 mmol) in EtOH was added H<sub>2</sub>O<sub>2</sub> (0.186 mL, 5.0 equivalents) at room temperature. Next, the reaction was stirred at room temperature for around 12h until no starting material left. The reaction solution was then diluted with EtOAc (around 50 mL), washed with H<sub>2</sub>O (10 mL), brine (10 mL) and dried by Na<sub>2</sub>SO<sub>4</sub>. The desired phenol (**17d**, **18a**) was obtained after filtration, concentration and silica gel column (**Scheme S10**).

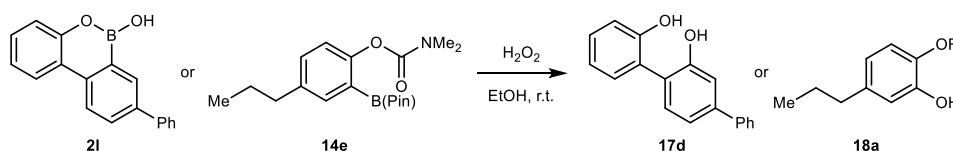

**Scheme S10.** Borylation of [1,1':3',1''-terphenyl]-2'-ol

## VI. Mechanism studies

All the data of mechanism studies were obtained during the condition screening and substrate scope studies. No additional experiments were performed for mechanism studies.

## VII. Analytical data of starting materials, intermediates and products

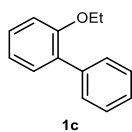

**2-ethoxy-1,1'-biphenyl<sup>1</sup> (1c)** was prepared as shown in **Scheme S1**, obtained as a colorless liquid, quantitative yield (1.0g, 5.0 mmol scale).

**<sup>1</sup>H NMR** (600 MHz, Chloroform-d)  $\delta$  7.58 (d,  $J$  = 8.3 Hz, 2H), 7.41 (t,  $J$  = 7.7 Hz, 2H), 7.36 – 7.28 (m, 3H), 7.03 (t,  $J$  = 7.9 Hz, 1H), 6.99 (d,  $J$  = 8.2 Hz, 1H), 4.05 (q,  $J$  = 7.0 Hz, 2H), 1.36 (t,  $J$  = 7.0 Hz, 3H)

**<sup>13</sup>C NMR** (101 MHz, Chloroform-d)  $\delta$  156.0, 138.8, 131.0, 129.7, 128.7, 128.0, 126.9, 121.0, 112.8, 64.2, 14.9 (one carbon was buried in other peaks)

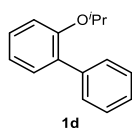

**2-isopropoxy-1,1'-biphenyl<sup>1</sup> (1d)** was prepared as shown in **Scheme S1**, obtained as a pale-yellow liquid, 95% yield (404.2mg, 2.0 mmol scale).

**<sup>1</sup>H NMR** (600 MHz, Chloroform-d)  $\delta$  7.56 (d,  $J$  = 7.5 Hz, 2H), 7.40 (t,  $J$  = 7.6 Hz, 2H), 7.34 (d,  $J$  = 7.5 Hz, 1H), 7.33 – 7.30 (m, 1H), 7.28 (d,  $J$  = 7.9 Hz, 1H), 7.03 (t,  $J$  = 7.5 Hz, 1H), 7.00 (d,  $J$  = 8.2 Hz, 1H), 4.44 (q,  $J$  = 6.1 Hz, 1H), 1.25 (d,  $J$  = 6.1 Hz, 6H)

**<sup>13</sup>C NMR** (101 MHz, Chloroform-d)  $\delta$  155.0, 139.1, 132.3, 131.2, 129.7, 128.5, 127.9, 126.8, 121.2, 115.5, 71.1, 22.2

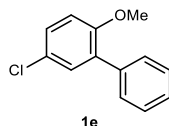

**5-chloro-2-methoxy-1,1'-biphenyl<sup>2</sup> (1e)** was prepared as shown in **Scheme S1**, obtained as a pale-yellow liquid, 91% yield (1.33g, 5.0 mmol scale)

**<sup>1</sup>H NMR** (600 MHz, Chloroform-d)  $\delta$  7.52 (s, 1H), 7.40 (d,  $J$  = 7.5 Hz, 1H), 7.36 – 7.32 (m, 2H), 7.30 – 7.28 (m, 2H), 7.05 – 7.01 (m, 1H), 6.98 (d,  $J$  = 8.3 Hz, 1H), 3.82 (s, 3H).

**<sup>13</sup>C NMR** (151 MHz, Chloroform-d)  $\delta$  155.1, 137.2, 132.2, 130.5, 129.4, 128.08, 128.05, 127.4, 125.7, 112.4, 55.9

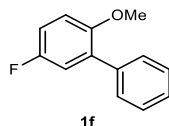

**5-fluoro-2-methoxy-1,1'-biphenyl<sup>3</sup> (1f)** was prepared as shown in **Scheme S1**, obtained as a yellow liquid, 91% yield (3.69g, 20 mmol scale)

**<sup>1</sup>H NMR** (600 MHz, Chloroform-d)  $\delta$  7.53 (d,  $J$  = 7.0 Hz, 2H), 7.43 (t,  $J$  = 7.6 Hz, 2H), 7.36 (t,  $J$  = 7.4 Hz, 1H), 7.09 – 7.06 (m, 1H), 7.03 – 6.99 (m, 1H), 6.92 (dd,  $J$  = 9.0, 4.5 Hz, 1H), 3.79 (s, 3H).



**<sup>13</sup>C NMR** (151 MHz, Chloroform-d)  $\delta$  157.3 (d,  $J_{C-F} = 238.6$  Hz), 157.3 (d,  $^4J_{C-F} = 3.0$  Hz), 137.6, 132.2 (d,  $^3J_{C-F} = 7.6$  Hz), 129.5, 128.3, 127.5, 117.5 (d,  $^2J_{C-F} = 24.2$  Hz), 114.4 (d,  $^2J_{C-F} = 22.6$  Hz), 112.5 (d,  $^3J_{C-F} = 9.1$  Hz), 56.4

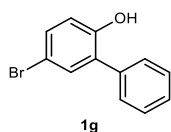

**5-bromo-[1,1'-biphenyl]-2-ol<sup>4</sup> (1g)** was prepared as shown in **Scheme S5**, obtained as a yellow solid, quantitative yield (1.29g, 5.0 mmol scale)

**<sup>1</sup>H NMR** (400 MHz, Chloroform-d)  $\delta$  7.54 – 7.47 (m, 2H), 7.46 – 7.40 (m, 3H), 7.39 – 7.33 (m, 2H), 6.88 (d,  $J = 8.4$  Hz, 1H), 5.23 (b, 1H)

**<sup>13</sup>C NMR** (101 MHz, Chloroform-d)  $\delta$  151.6, 135.7, 132.6, 131.8, 130.0, 129.4, 128.9, 128.4, 117.6, 112.7

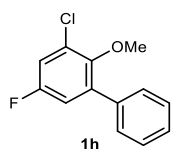

**3-chloro-5-fluoro-2-methoxy-1,1'-biphenyl (1h)** was prepared as following procedure.

To the solution of compound **1f** (808mg, 4.0 mmol, 1.0 equivalent) in MeCN (10 mL) was added NCS (801 mg, 6.0 mmol, 1.5 equivalents). Next, the reaction was stirred at 50°C for 12h, and diluted with around 100 mL EtOAc. The resulting mixture was then washed with Na<sub>2</sub>S<sub>2</sub>O<sub>3</sub> (aq., 30 mL), H<sub>2</sub>O (30 mL), brine (30 mL) and dried by Na<sub>2</sub>SO<sub>4</sub>. The desired product **1h** was obtained as a colorless liquid, 38% yield (361.7 mg) after filtration, concentration and purified by silica gel column (**Scheme S11**)

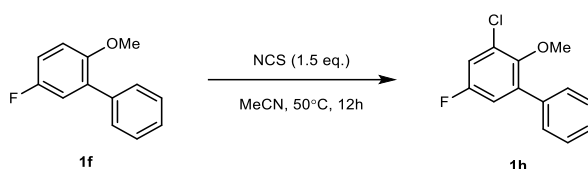

**Scheme S11.** Preparation of starting material **1h**

**<sup>1</sup>H NMR** (600 MHz, Chloroform-d)  $\delta$  7.54 (d,  $J = 7.7$  Hz, 2H), 7.44 (t,  $J = 7.5$  Hz, 2H), 7.40 (d,  $J = 7.3$  Hz, 1H), 7.12 (dd,  $J = 7.5, 2.6$  Hz, 1H), 6.99 (dd,  $J = 8.6, 2.6$  Hz, 1H), 3.46 (s, 3H)

**<sup>13</sup>C NMR** (101 MHz, Chloroform-d)  $\delta$  158.3 (d,  $J_{C-F} = 246$  Hz), 150.1 (d,  $^4J_{C-F} = 3$  Hz), 137.8 (d,  $^3J_{C-F} = 9$  Hz), 136.8, 129.4 (d,  $^3J_{C-F} = 12$  Hz), 129.1, 128.6, 128.2, 116.4 (d,  $^2J_{C-F} = 23$  Hz), 116.1 (d,  $^2J_{C-F} = 23$  Hz), 60.8

**<sup>19</sup>F NMR** (565 MHz, Chloroform-d)  $\delta$  -116.97

**HRMS** failed to obtain for some unknown reason. We tried several times.

**IR** (KBr, cm<sup>-1</sup>): 1573, 1470, 1410, 1234, 1004, 936, 750

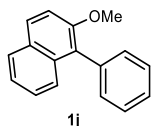

**12-methoxy-1-phenylnaphthalene**<sup>5</sup> (**1j**) was prepared as shown in **Scheme S1**, obtained as a yellow solid, 68% yield (3.2g, 20 mmol scale).

<sup>1</sup>H NMR (600 MHz, Chloroform-d) δ 7.91-7.90 (m, 1H), 7.86 – 7.84 (m, 1H), 7.54-7.51 (m, 3H), 7.45 (t, *J* = 8.0 Hz, 1H), 7.41-7.39 (m, 3H), 7.37-7.35 (m, 2H), 3.86 (s, 3H)

<sup>13</sup>C NMR (151 MHz, Chloroform-d) δ 153.9, 136.6, 133.8, 131.1, 129.2, 129.2, 128.3, 128.0, 127.2, 126.4, 125.6, 125.4, 123.7, 114.0, 56.9

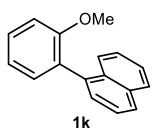

**1-(2-methoxyphenyl)naphthalene**<sup>6</sup> (**1k**) was prepared as shown in **Scheme S2**, obtained as a brown solid, 79% yield (1.11g, 6.0 mmol scale)

<sup>1</sup>H NMR (600 MHz, Chloroform-d) δ 7.81 (d, *J* = 8.2 Hz, 1H), 7.78 (d, *J* = 8.2 Hz, 1H), 7.50 (d, *J* = 8.5 Hz, 1H), 7.47 – 7.43 (m, 1H), 7.40 – 7.28 (m, 4H), 7.21 (d, *J* = 7.4 Hz, 1H), 7.00 (t, *J* = 7.4 Hz, 1H), 6.97 (d, *J* = 8.3 Hz, 1H), 3.62 (s, 3H)

<sup>13</sup>C NMR (101 MHz, Chloroform-d) δ 157.2, 136.9, 133.4, 132.1, 131.9, 129.5, 129.0, 128.1, 127.6, 127.3, 126.4, 125.6, 125.5, 125.3, 120.5, 111.0, 55.5

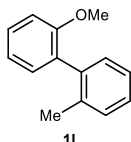

**2-methoxy-2'-methyl-1,1'-biphenyl**<sup>7</sup> (**1l**) was prepared as shown in **Scheme S2**, obtained as a yellow solid, 44% yield (435mg, 5.0 mmol scale)

<sup>1</sup>H NMR (600 MHz, Chloroform-d) δ 7.33 (t, *J* = 9.7 Hz, 1H), 7.22 (s, 1H), 7.19 – 7.16 (m, 1H), 7.16 – 7.12 (m, 1H), 7.01 (d, *J* = 12.2 Hz, 1H), 6.95 (d, *J* = 7.4 Hz, 1H), 3.75 (m, 3H), 2.14 (s, 3H)

<sup>13</sup>C NMR (151 MHz, Chloroform-d) δ 156.6, 138.6, 136.8, 131.0, 130.8, 130.0, 129.5, 128.5, 127.3, 125.4, 120.4, 110.6, 55.4, 19.9

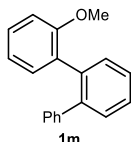

**2-methoxy-1,1':2',1''-terphenyl**<sup>8</sup> (**1m**) was prepared as shown in **Scheme S2**, obtained as a colorless liquid, 63% yield (820.3mg pure, 5.0 mmol scale).

<sup>1</sup>H NMR (400 MHz, Chloroform-d) δ 7.45 – 7.37 (m, 4H), 7.25 – 7.11 (m, 7H), 6.92 (t, *J* = 7.8 Hz, 1H), 6.70 (d, *J* = 8.2 Hz, 1H), 3.34 (s, 3H)

<sup>13</sup>C NMR (101 MHz, Chloroform-d) δ 156.2, 142.2, 141.7, 137.3, 131.6, 130.9, 130.7, 129.6, 128.9, 128.5, 127.5, 127.4, 127.1, 126.2, 120.4, 110.7, 54.9 (one carbon was buried in other peaks)

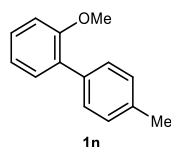

**2-methoxy-4'-methyl-1,1'-biphenyl**<sup>9</sup> (**1n**) was prepared as shown in **Scheme S2**, obtained as a white solid, 81% yield (803.1mg, 5.0 mmol scale)

<sup>1</sup>H NMR (600 MHz, Chloroform-d)  $\delta$  7.42 (d,  $J$  = 7.8 Hz, 2H), 7.30 (d,  $J$  = 7.5 Hz, 2H), 7.21-7.21 (m, 2H), 7.01 (t,  $J$  = 7.4 Hz, 1H), 6.97 (d,  $J$  = 8.1 Hz, 1H), 3.79 (s, 3H), 2.38 (s, 3H)

<sup>13</sup>C NMR (151 MHz, Chloroform-d)  $\delta$  156.5, 136.6, 135.6, 130.8, 130.7, 129.4, 128.8, 128.4, 120.8, 111.2, 55.6, 21.2

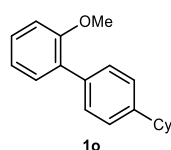

**4'-cyclohexyl-2-methoxy-1,1'-biphenyl** (**1o**) was prepared as shown in **Scheme S2**, obtained as a white solid, 90% yield (1.19g, 5.0 mmol scale)

<sup>1</sup>H NMR (600 MHz, Chloroform-d)  $\delta$  7.39 (d,  $J$  = 8.1 Hz, 2H), 7.26 – 7.24 (m, 1H), 7.22 (t,  $J$  = 7.8 Hz, 1H), 7.17 (d,  $J$  = 7.5 Hz, 2H), 6.94 (t,  $J$  = 7.4 Hz, 1H), 6.90 (d,  $J$  = 8.2 Hz, 1H), 3.73 (s, 3H), 2.46-2.44 (m, 1H), 1.85 (d,  $J$  = 12.3 Hz, 2H), 1.78 (d,  $J$  = 12.6 Hz, 2H), 1.68 (d,  $J$  = 13.1 Hz, 1H), 1.42-1.32 (m, 4H), 1.23 – 1.16 (m, 1H).

<sup>13</sup>C NMR (101 MHz, Chloroform-d)  $\delta$  156.6, 146.8, 136.0, 131.0, 130.8, 129.5, 128.4, 126.6, 120.9, 111.3, 55.7, 44.4, 34.6, 27.1, 26.4

HRMS for C<sub>19</sub>H<sub>22</sub>NaO<sup>+</sup> [M+Na]<sup>+</sup>: 289.1563; found 289.1557

IR (KBr, cm<sup>-1</sup>): 2926, 2847, 1560, 1482, 1464, 1283, 1028, 732

M.p.: 66-69.3°C

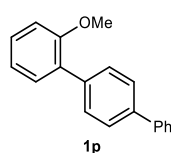

**2-methoxy-1,1':4',1''-terphenyl**<sup>10</sup> (**1p**) was prepared as shown in **Scheme S2** for 8h, obtained as a white solid, 73 yield (1.9g, 10 mmol scale).

<sup>1</sup>H NMR (600 MHz, Chloroform-d)  $\delta$  7.68-7.64 (m, 6H), 7.48 (t,  $J$  = 7.6 Hz, 2H), 7.40 (d,  $J$  = 7.5 Hz, 1H), 7.37 (q,  $J$  = 7.0 Hz, 2H), 7.08 (t,  $J$  = 7.4 Hz, 1H), 7.03 (d,  $J$  = 8.2 Hz, 1H), 3.87 (s, 3H)

<sup>13</sup>C NMR (101 MHz, Chloroform-d)  $\delta$  156.7, 141.2, 139.9, 137.7, 131.0, 130.4, 130.1, 128.9, 128.8, 127.3, 127.3, 126.9, 121.0, 111.4, 55.7

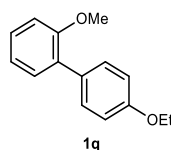

**4'-ethoxy-2-methoxy-1,1'-biphenyl**<sup>11</sup> (**1q**) was prepared as shown in **Scheme S2**, obtained as a

yellow liquid, 76% yield (861.2mg pure, 5.0 mmol scale).

$^1\text{H NMR}$  (600 MHz, Chloroform-d)  $\delta$  7.47 (d,  $J$  = 8.6 Hz, 2H), 7.30 (dd,  $J$  = 11.1, 7.6 Hz, 2H), 7.02 (t,  $J$  = 7.4 Hz, 1H), 6.98 (d,  $J$  = 8.1 Hz, 1H), 6.95 (d,  $J$  = 8.6 Hz, 2H), 4.08 (q,  $J$  = 7.0 Hz, 2H), 3.82 (s, 3H), 1.44 (t,  $J$  = 7.0 Hz, 3H)

$^{13}\text{C NMR}$  (101 MHz, Chloroform-d)  $\delta$  158.0, 156.4, 130.7, 130.7, 130.5, 130.4, 128.1, 120.8, 114.0, 111.2, 63.4, 55.5, 14.9

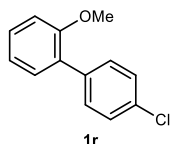

**4'-chloro-2-methoxy-1,1'-biphenyl**<sup>12</sup> (**1r**) was prepared as shown in **Scheme S2**, obtained as a white solid, 99% yield (1.08g, 5.0 mmol scale).

$^1\text{H NMR}$  (600 MHz, Chloroform-d)  $\delta$  7.48 (d,  $J$  = 8.6 Hz, 2H), 7.38 (d,  $J$  = 8.6 Hz, 2H), 7.36 – 7.33 (m, 1H), 7.30 (dd,  $J$  = 7.5, 1.7 Hz, 1H), 7.04 (t,  $J$  = 8.0 Hz, 1H), 7.00 (d,  $J$  = 7.5 Hz, 1H), 3.82 (s, 3H)

$^{13}\text{C NMR}$  (101 MHz, Chloroform-d)  $\delta$  156.3, 136.9, 132.8, 130.8, 130.6, 129.4, 129.0, 128.12, 120.9, 111.3, 55.5

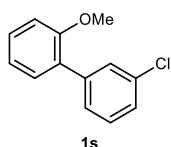

**3'-chloro-2-methoxy-1,1'-biphenyl**<sup>13</sup> (**1s**) was prepared as shown in **Scheme S2**, obtained as a colorless liquid, quantitative yield (563.2mg, 2.5 mmol scale)

$^1\text{H NMR}$  (600 MHz, Chloroform-d)  $\delta$  7.53 (s, 1H), 7.41 (d,  $J$  = 7.5 Hz, 1H), 7.36 – 7.32 (m, 2H), 7.30 (d,  $J$  = 7.6 Hz, 2H), 7.04 (t,  $J$  = 7.5 Hz, 1H), 6.99 (d,  $J$  = 8.3 Hz, 1H), 3.83 (s, 3H)

$^{13}\text{C NMR}$  (151 MHz, Chloroform-d)  $\delta$  156.3, 140.3, 133.7, 130.7, 129.6, 129.2, 129.2 (two carbons), 127.7, 126.9, 120.9, 111.2, 55.5

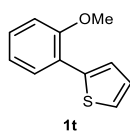

**2-(2-methoxyphenyl)thiophene**<sup>14</sup> (**1t**) was prepared as shown in **Scheme S2**, obtained as a green liquid, 94% yield (895.6mg, 5.0 mmol scale)

$^1\text{H NMR}$  (600 MHz, Chloroform-d)  $\delta$  7.68 (d,  $J$  = 7.7 Hz, 1H), 7.54 (s, 1H), 7.36 (d,  $J$  = 5.1 Hz, 1H), 7.32 – 7.28 (m, 1H), 7.13 (t,  $J$  = 4.2 Hz, 1H), 7.06 – 7.01 (m, 2H), 3.96 (s, 3H).

$^{13}\text{C NMR}$  (101 MHz, Chloroform-d)  $\delta$  155.7, 139.6, 128.7, 128.5, 126.9, 125.5, 125.5, 123.5, 121.1, 111.8, 55.7

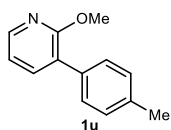

**2-methoxy-3-phenylpyridine<sup>15</sup> (1u)** was prepared as shown in **Scheme S2**, obtained as a yellow liquid, 93% yield (925.4mg, 5.0 mmol scale).

**<sup>1</sup>H NMR** (600 MHz, Chloroform-d)  $\delta$  8.14 (d,  $J$  = 5.0 Hz, 1H), 7.58 (d,  $J$  = 7.3 Hz, 1H), 7.45 (d,  $J$  = 7.9 Hz, 2H), 7.23 (d,  $J$  = 7.9 Hz, 2H), 6.95 (dd,  $J$  = 7.1, 5.1 Hz, 1H), 3.96 (s, 3H), 2.39 (s, 3H)

**<sup>13</sup>C NMR** (151 MHz, Chloroform-d)  $\delta$  160.9, 145.4, 138.4, 137.3, 133.8, 129.0, 128.9, 124.6, 117.0, 53.5, 21.2

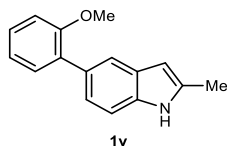

**5-(2-methoxyphenyl)-2-methyl-1H-indole (1v)** was prepared as shown in **Scheme S2**, obtained as a red-brown solid, 30% yield (357.2mg, 5.0 mmol scale).

**<sup>1</sup>H NMR** (600 MHz, Chloroform-d)  $\delta$  9.51 (s, 1H), 8.28 (t,  $J$  = 3.1 Hz, 1H), 8.19 (dd,  $J$  = 7.9, 4.6 Hz, 1H), 8.12 (t,  $J$  = 2.9 Hz, 1H), 7.93 (s, 1H), 7.29 – 7.21 (m, 2H), 7.20 – 7.14 (m, 1H), 6.30 (s, 1H), 2.46 (s, 3H)

**<sup>13</sup>C NMR** (101 MHz, Chloroform-d)  $\delta$  156.8, 135.5, 135.4, 132.4, 131.5, 130.1, 129.2, 127.9, 123.1, 120.9, 120.7, 111.4, 109.7, 100.8, 55.7, 13.8

**HRMS** calculated for  $C_{16}H_{14}NO^-$  [ $M-H$ ] $^-$ : 236.1081; found 236.1073

**IR** (KBr,  $cm^{-1}$ ): 2289, 2941, 1732, 1467, 1228, 1181, 1031, 790

**M.p.:** 66.0-76.4°C

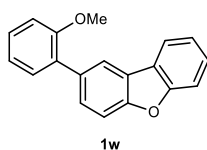

**2-(2-methoxyphenyl)dibenzo[b,d]furan (1w)** was prepared as shown in **Scheme S2**, obtained as a yellow oil, quantitative yield (1.48g, 5.0 mmol scale).

**<sup>1</sup>H NMR** (600 MHz, Chloroform-d)  $\delta$  8.08 (s, 1H), 7.96 (d,  $J$  = 7.6 Hz, 1H), 7.65 – 7.56 (m, 3H), 7.45 (t,  $J$  = 7.7 Hz, 1H), 7.40 (d,  $J$  = 8.8 Hz, 1H), 7.38 – 7.33 (m, 2H), 7.07 (t,  $J$  = 7.4 Hz, 1H), 7.03 (d,  $J$  = 8.3 Hz, 1H), 3.84 (s, 3H).

**<sup>13</sup>C NMR** (101 MHz, Chloroform-d)  $\delta$  156.5, 156.5, 155.4, 133.3, 131.2, 130.7, 128.9, 128.6, 127.0, 124.4, 124.1, 122.6, 121.6, 120.9, 120.7, 111.6, 111.3, 111.0, 55.6

**HRMS** calculated for  $C_{19}H_{14}NaO_2^+$  ([ $M+Na$ ] $^+$ ): 297.0886; found 297.0877

**IR** (KBr,  $cm^{-1}$ ): 3462, 3003, 1596, 1476, 1446, 1255, 1193, 819

**M.p.:** 78.0-79.1°C

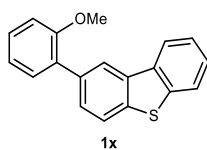

**2-(2-methoxyphenyl)dibenzo[b,d]thiophene (1x)** was prepared as shown in **Scheme S2**, obtained as a yellow solid, quantitative yield (1.65g, 5.0 mmol scale).

**<sup>1</sup>H NMR** (600 MHz, Chloroform-d)  $\delta$  8.29 (d,  $J$  = 1.4 Hz, 1H), 8.17 (dd,  $J$  = 6.3, 2.8 Hz, 1H), 7.89 –

7.85 (m, 2H), 7.64 (dd,  $J = 8.2, 1.5$  Hz, 1H), 7.48 – 7.41 (m, 3H), 7.41 – 7.35 (m, 1H), 7.09 (t,  $J = 7.4$  Hz, 1H), 7.04 (d,  $J = 8.3$  Hz, 1H), 3.84 (s, 3H)

$^{13}\text{C}$  NMR (101 MHz, Chloroform-d)  $\delta$  156.5, 139.7, 138.1, 135.7, 135.5, 135.0, 131.1, 130.6, 128.7, 128.5, 126.6, 124.3, 122.8, 122.4, 122.1, 121.6, 120.9, 111.3, 55.6

HRMS calculated for  $\text{C}_{19}\text{H}_{14}\text{NaOS}^+$  ( $[\text{M}+\text{Na}]^+$ ): 313.0658; found 313.0662

IR (KBr,  $\text{cm}^{-1}$ ): 3500, 3009, 2830, 1499, 1467, 1255, 1028, 760, 739

M.p.: 75.3-87.9°C

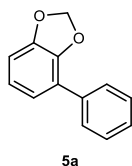

**4-phenylbenzo[d][1,3]dioxole**<sup>16</sup> (**5a**) was prepared as shown in **Scheme S1**, obtained as a yellow liquid, 83% yield (330.5mg, 2.0 mmol scale)

$^1\text{H}$  NMR (600 MHz, Chloroform-d)  $\delta$  7.72 (d,  $J = 7.9$  Hz, 2H), 7.45 (t,  $J = 7.7$  Hz, 2H), 7.35 (t,  $J = 7.4$  Hz, 1H), 7.07 (d,  $J = 8.0$  Hz, 1H), 6.93 (t,  $J = 7.9$  Hz, 1H), 6.83 (d,  $J = 7.7$  Hz, 1H), 6.02 (s, 2H)

$^{13}\text{C}$  NMR (151 MHz, Chloroform-d)  $\delta$  147.8, 144.6, 135.9, 128.5, 127.9, 127.5, 123.0, 122.0, 121.3, 107.6, 100.6

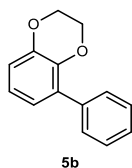

**5-phenyl-2,3-dihydrobenzo[b][1,4]dioxine**<sup>17</sup> (**5b**) was prepared as shown in **Scheme S1**, obtained as a yellow liquid, 97% yield (411.6mg, 2.0 mmol scale)

$^1\text{H}$  NMR (600 MHz, Chloroform-d)  $\delta$  7.55 (d,  $J = 6.7$  Hz, 2H), 7.42 (t,  $J = 7.7$  Hz, 2H), 7.34 (t,  $J = 7.4$  Hz, 1H), 6.93 – 6.88 (m, 3H), 4.31 – 4.29 (m, 2H), 4.27 (dd,  $J = 5.6, 2.1$  Hz, 2H).

$^{13}\text{C}$  NMR (101 MHz, Chloroform-d)  $\delta$  143.8, 140.7, 137.6, 130.9, 128.0, 127.1, 122.8, 121.0, 116.6, 64.3, 64.1

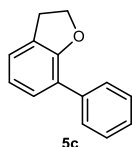

**7-phenyl-2,3-dihydrobenzofuran**<sup>18</sup> (**5c**) was prepared as shown in **Scheme S1**, obtained as a colorless liquid, quantitative yield (421.6mg, 2.0 mmol scale).

$^1\text{H}$  NMR (600 MHz, Chloroform-d)  $\delta$  7.70 (d,  $J = 7.1$  Hz, 2H), 7.43 (t,  $J = 7.8$  Hz, 2H), 7.32 (t,  $J = 7.4$  Hz, 1H), 7.29 (d,  $J = 8.2$  Hz, 1H), 7.19 (d,  $J = 8.4$  Hz, 1H), 6.95 (t,  $J = 7.5$  Hz, 1H), 4.62 (t,  $J = 8.8$  Hz, 2H), 3.28 (t,  $J = 8.7$  Hz, 2H)

$^{13}\text{C}$  NMR (101 MHz, Chloroform-d)  $\delta$  157.3, 137.5, 128.5 (two carbons), 128.0, 127.9, 127.2, 124.1, 123.7, 121.0, 71.1, 30.0

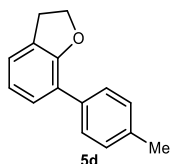

**7-(*p*-tolyl)-2,3-dihydrobenzofuran<sup>19</sup> (5d)** was prepared as shown in **Scheme S1**, obtained as a yellow solid, 81% yield (340.2mg, 2.0 mmol scale).

<sup>1</sup>H NMR (600 MHz, Chloroform-*d*) δ 7.58 (d, *J* = 8.1 Hz, 2H), 7.27 – 7.21 (m, 3H), 7.15 (d, *J* = 7.3 Hz, 1H), 6.91 (t, *J* = 7.5 Hz, 1H), 4.59 (t, *J* = 8.7 Hz, 2H), 3.26 (t, *J* = 8.7 Hz, 2H), 2.37 (s, 3H)

<sup>13</sup>C NMR (151 MHz, Chloroform-*d*) δ 157.1, 136.8, 134.4, 129.0, 128.2, 127.6, 127.6, 123.66, 123.6, 120.8, 70.9, 29.9, 21.2

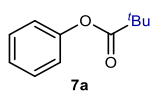

**phenyl pivalate (7a)** was prepared as shown in **Scheme S3**, obtained as a colorless liquid, 75% yield (661.6mg, 5.0 mmol scale).

<sup>1</sup>H NMR (600 MHz, Chloroform-*d*) δ 7.3 (t, *J* = 7.9 Hz, 2H), 7.1 (t, *J* = 7.4 Hz, 1H), 7.0 (d, *J* = 7.7 Hz, 2H), 1.3 (s, 10H).

<sup>13</sup>C NMR (101 MHz, Chloroform-*d*) δ 177.1, 151.1, 129.3, 125.5, 121.5, 39.0, 27.1

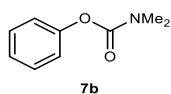

**phenyl diethylcarbamate<sup>20</sup> (7b)** was prepared as shown in **Scheme S3**, obtained as a yellow liquid, 83% yield (681.5mg, 5.0 mmol scale).

<sup>1</sup>H NMR (600 MHz, Chloroform-*d*) δ 7.35 (t, *J* = 7.2 Hz, 2H), 7.19 (t, *J* = 7.3 Hz, 1H), 7.11 (d, *J* = 7.9 Hz, 2H), 3.10 (s, 3H), 3.01 (s, 3H)

<sup>13</sup>C NMR (101 MHz, Chloroform-*d*) δ 155.1, 151.6, 129.3, 125.3, 121.9, 36.8, 36.6

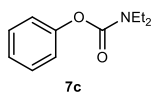

**phenyl dimethylcarbamate<sup>21</sup> (7c)** was prepared as shown in **Scheme S3**, obtained as a yellow liquid, quantitative yield (1.02g, 5.0 mmol scale).

<sup>1</sup>H NMR (600 MHz, Chloroform-*d*) δ 7.35 (t, *J* = 7.7 Hz, 2H), 7.18 (t, *J* = 7.4 Hz, 1H), 7.12 (d, *J* = 7.9 Hz, 2H), 3.44 (d, *J* = 7.2 Hz, 2H), 3.39 (d, *J* = 7.0 Hz, 2H), 1.26 (s, 3H), 1.20 (d, *J* = 7.2 Hz, 2H)

<sup>13</sup>C NMR (101 MHz, Chloroform-*d*) δ 154.2, 151.5, 129.2, 125.0, 121.7

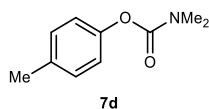

***p*-tolyl dimethylcarbamate<sup>22</sup> (7d)** was prepared as shown in **Scheme S3**, obtained as a yellow liquid, 98% yield (881.8mg, 5.0 mmol scale)

**<sup>1</sup>H NMR** (600 MHz, Chloroform-d)  $\delta$  7.14 (d,  $J$  = 8.0 Hz, 2H), 6.98 (dd,  $J$  = 8.3, 1.6 Hz, 2H), 3.09 (s, 3H), 3.00 (s, 3H), 2.33 (s, 3H)

**<sup>13</sup>C NMR** (101 MHz, Chloroform-d)  $\delta$  155.3, 149.4, 134.8, 129.8, 121.6, 36.8, 36.5, 20.9

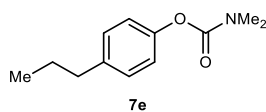

**4-propylphenyl dimethylcarbamate**<sup>23</sup> (**7e**) was prepared as shown in **Scheme S3**, obtained as a yellow liquid, quantitative yield (1.07g, 5.0 mmol scale)

**<sup>1</sup>H NMR** (600 MHz, Chloroform-d)  $\delta$  7.05 (d,  $J$  = 8.5 Hz, 2H), 6.91 (d,  $J$  = 8.5 Hz, 2H), 2.99 (s, 3H), 2.91 (s, 3H), 2.50 – 2.45 (m, 2H), 1.55-1.51 (m, 2H), 0.84 (t,  $J$  = 7.3 Hz, 3H)

**<sup>13</sup>C NMR** (151 MHz, Chloroform-d)  $\delta$  155.1, 149.4, 139.5, 129.1, 121.3, 37.4, 36.6, 36.4, 24.5, 13.7

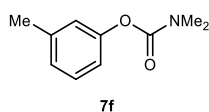

**m-tolyl dimethylcarbamate**<sup>22</sup> (**7f**) was prepared as shown in **Scheme S3**, obtained as a yellow liquid, quantitative yield (915.1 mg, 5.0 mmol scale).

**<sup>1</sup>H NMR** (600 MHz, Chloroform-d)  $\delta$  7.25 (t,  $J$  = 7.8 Hz, 1H), 7.02 (d,  $J$  = 7.6 Hz, 1H), 6.96 (s, 1H), 6.93 (d,  $J$  = 8.1 Hz, 1H), 3.11 (s, 3H), 3.03 (s, 3H), 2.37 (s, 3H)

**<sup>13</sup>C NMR** (151 MHz, Chloroform-d)  $\delta$  155.0, 151.4, 139.3, 128.9, 125.9, 122.4, 118.7, 36.6, 36.4, 21.3

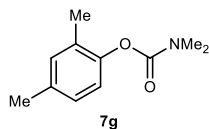

**2,4-dimethylphenyl dimethylcarbamate**<sup>24</sup> (**7g**) was prepared as shown in **Scheme S3**, obtained as a yellow liquid, quantitative yield (1.03 g, 5.0 mmol scale).

**<sup>1</sup>H NMR** (600 MHz, Chloroform-d)  $\delta$  6.91 (s, 1H), 6.88 (d,  $J$  = 8.2 Hz, 1H), 6.83 (d,  $J$  = 8.1 Hz, 1H), 3.02 (s, 3H), 2.91 (s, 3H), 2.19 (s, 3H), 2.07 (s, 3H)

**<sup>13</sup>C NMR** (151 MHz, Chloroform-d)  $\delta$  154.9, 147.7, 134.8, 131.5, 129.8, 127.3, 121.8, 36.7, 36.4, 20.7, 16.0

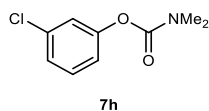

**3-chlorophenyl dimethylcarbamate**<sup>22</sup> (**7h**) was prepared as shown in **Scheme S3**, obtained as a yellow liquid, quantitative yield (5.7g, 25 mmol scale)

**<sup>1</sup>H NMR** (600 MHz, Chloroform-d)  $\delta$  7.28 (d,  $J$  = 8.1 Hz, 1H), 7.17 (d,  $J$  = 8.5 Hz, 1H), 7.16 (s, 1H), 7.02 (dd,  $J$  = 8.7, 1.6 Hz, 1H), 3.09 (s, 3H), 3.01 (s, 3H)

**<sup>13</sup>C NMR** (101 MHz, Chloroform-d)  $\delta$  154.3, 152.0, 134.4, 129.9, 122.4, 120.1, 36.7, 36.4



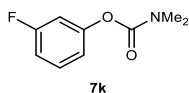

**3-fluorophenyl dimethylcarbamate**<sup>23</sup> (**7i**) was prepared as shown in **Scheme S3**, obtained a pale-yellow liquid, quantitative yield (1.05g, 5.0 mmol scale).

**<sup>1</sup>H NMR** (600 MHz, Chloroform-d)  $\delta$  7.33 – 7.27 (m, 1H), 6.94 – 6.85 (m, 3H), 3.09 (s, 3H), 3.01 (s, 3H)

**<sup>13</sup>C NMR** (151 MHz, Chloroform-d)  $\delta$  163.0 (d,  $J_{C-F}$  = 163 Hz), 154.5, 152.6 (d,  $^3J_{C-F}$  = 7 Hz), 130.0 (d,  $^3J_{C-F}$  = 6 Hz), 117.6 (d,  $4J_{C-F}$  = 2 Hz), 112.3 (d,  $^2J_{C-F}$  = 13 Hz), 110.0 (d,  $^2J_{C-F}$  = 16 Hz), 36.9, 36.6

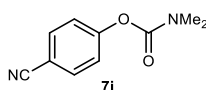

**4-cyanophenyl dimethylcarbamate**<sup>25</sup> (**7j**) was prepared as shown in **Scheme S3**, obtained as a white solid, quantitative yield (1.03g, 5.0 mmol scale).

**<sup>1</sup>H NMR** (600 MHz, Chloroform-d)  $\delta$  7.61 – 7.56 (m, 2H), 7.21 – 7.16 (m, 2H), 3.04 (s, 3H), 2.95 (s, 3H)

**<sup>13</sup>C NMR** (151 MHz, Chloroform-d)  $\delta$  155.0, 153.7, 133.6, 122.8, 118.6, 108.9, 36.9, 36.6

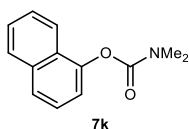

**naphthalen-1-yl dimethylcarbamate**<sup>22</sup> (**7k**) was prepared as shown in **Scheme S3**, obtained as a brown liquid, quantitative yield (1.26g, 5.0 mmol scale).

**<sup>1</sup>H NMR** (600 MHz, Chloroform-d)  $\delta$  7.99 (t,  $J$  = 7.0 Hz, 2H), 7.87 – 7.83 (m, 1H), 7.72 (d,  $J$  = 8.2 Hz, 1H), 7.52 – 7.47 (m, 2H), 2.99 (s, 3H), 2.87 (s, 3H)

**<sup>13</sup>C NMR** (101 MHz, Chloroform-d)  $\delta$  155.0, 147.4, 134.7, 128.5, 127.5, 126.34, 126.33, 125.6, 125.5, 121.4, 117.9, 37.0, 36.7

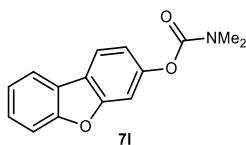

**dibenzo[b,d]furan-2-yl dimethylcarbamate** (**7l**) was prepared as shown in **Scheme S3**, obtained as a white solid, 88% yield (1.12g, 5.0 mmol scale).

**<sup>1</sup>H NMR** (600 MHz, Chloroform-d)  $\delta$  7.89 (dt,  $J$  = 7.6, 1.0 Hz, 1H), 7.71 (d,  $J$  = 2.4 Hz, 1H), 7.58 – 7.50 (m, 2H), 7.46 (dd,  $J$  = 8.4, 7.2 Hz, 1H), 7.33 (td,  $J$  = 7.5 Hz, 1H), 7.19 (dd,  $J$  = 8.8 Hz, 1H), 3.16 (s, 3H), 3.05 (s, 3H)

**<sup>13</sup>C NMR** (151 MHz, Chloroform-d)  $\delta$  156.9, 155.3, 153.4, 147.0, 127.4, 124.8, 124.1, 122.7, 121.0, 120.8, 113.8, 111.8, 111.7, 36.8, 36.5

**HRMS** calculated for  $C_{15}H_{13}NNaO_3^+$   $[M+Na]^+$ : 278.0788; found 278.0796

**IR** (KBr,  $cm^{-1}$ ): 1707, 1443, 1391, 1218, 1178, 796

**M.p.:** 97-98.6°C

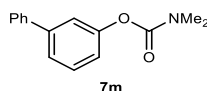

**[1,1'-biphenyl]-3-yl dimethylcarbamate<sup>26</sup> (7m)** was prepared as shown in **Scheme S4**, obtained as a brown liquid, 76% yield (544.1mg, 3.0 mmol scale).

**<sup>1</sup>H NMR** (600 MHz, Chloroform-d)  $\delta$  7.59 (d,  $J$  = 7.8 Hz, 2H), 7.43 (d,  $J$  = 6.2 Hz, 4H), 7.35 (d,  $J$  = 2.2 Hz, 2H), 7.13 – 7.10 (m, 1H), 3.13 (s, 3H), 3.04 (s, 3H).

**<sup>13</sup>C NMR** (151 MHz, Chloroform-d)  $\delta$  155.04, 152.04, 142.73, 140.52, 129.63, 129.62, 128.86, 128.84, 127.64, 127.63, 127.32, 124.08, 120.70, 120.68, 36.84, 36.60

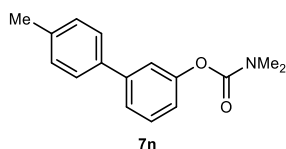

**4'-methyl-[1,1'-biphenyl]-3-yl dimethylcarbamate<sup>27</sup> (7n)** was prepared as shown in **Scheme S4**, obtained as a yellow liquid, 74% yield (567mg, 3.0 mmol scale).

**<sup>1</sup>H NMR** (600 MHz, Chloroform-d)  $\delta$  7.49 (d,  $J$  = 8.1 Hz, 2H), 7.42 – 7.40 (m, 2H), 7.33 (s, 1H), 7.24 (d,  $J$  = 8.0 Hz, 2H), 7.08 (dt,  $J$  = 5.4, 2.5 Hz, 1H), 3.13 (s, 3H), 3.03 (s, 3H), 2.39 (s, 3H)

**<sup>13</sup>C NMR** (151 MHz, Chloroform-d)  $\delta$  155.1, 152.0, 142.7, 137.6, 137.4, 129.6, 127.1, 123.9, 120.41, 120.38, 36.8, 36.6, 21.2

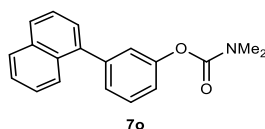

**3-(naphthalen-1-yl)phenyl dimethylcarbamate (7o)** was prepared as shown in **Scheme S4**, obtained as a brown liquid, 76% yield (661.9mg, 3.0 mmol scale).

**<sup>1</sup>H NMR** (400 MHz, Chloroform-d)  $\delta$  7.94 (d,  $J$  = 8.2 Hz, 1H), 7.90 (d,  $J$  = 7.6 Hz, 1H), 7.86 (d,  $J$  = 8.1 Hz, 1H), 7.55 – 7.42 (m, 5H), 7.34 (d,  $J$  = 7.9 Hz, 1H), 7.24 – 7.19 (m, 1H), 3.13 (s, 3H), 3.04 (s, 3H).

**<sup>13</sup>C NMR** (101 MHz, Chloroform-d)  $\delta$  155.0, 151.5, 142.1, 139.4, 133.9, 131.6, 129.1, 128.4, 128.0, 127.1, 127.0, 126.3, 126.1, 125.9, 125.4, 123.5, 120.8, 36.8, 36.6

**HRMS** calculated for C<sub>19</sub>H<sub>17</sub>NNaO<sub>2</sub><sup>+</sup> [M+Na]<sup>+</sup>: 314.1151; found 314.1149

**IR** (KBr, cm<sup>-1</sup>): 3049, 2938, 1723, 1488, 1391, 1201, 1178, 893

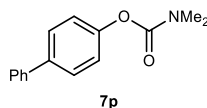

**[1,1'-biphenyl]-4-yl dimethylcarbamate<sup>27</sup> (7p)** was prepared as shown in **Scheme S3**, obtained as a white solid, quantitative yield (5.0 mmol scale).

**<sup>1</sup>H NMR** (600 MHz, Chloroform-d)  $\delta$  7.58 – 7.55 (m, 4H), 7.42 (t,  $J$  = 7.7 Hz, 2H), 7.33 (t,  $J$  = 7.4 Hz, 1H), 7.18 (d,  $J$  = 8.6 Hz, 2H), 3.11 (s, 3H), 3.03 (s, 3H)

**<sup>13</sup>C NMR** (151 MHz, Chloroform-d)  $\delta$  154.8, 150.9, 140.5, 138.2, 128.7, 127.9, 127.1, 127.0, 122.0, 36.6, 36.4

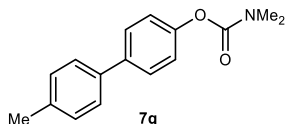

**4'-methyl-[1,1'-biphenyl]-4-yl dimethylcarbamate (7q)** was prepared as shown in **Scheme S4**, obtained as a grey solid, 81% yield (616.6 mg, 3.0 mmol scale).

**<sup>1</sup>H NMR** (600 MHz, Chloroform-d)  $\delta$  7.55 (d,  $J$  = 8.6 Hz, 2H), 7.46 (d,  $J$  = 8.1 Hz, 2H), 7.24 (d,  $J$  = 7.9 Hz, 2H), 7.17 (d,  $J$  = 8.6 Hz, 2H), 3.12 (s, 3H), 3.03 (s, 3H), 2.39 (s, 3H)

**<sup>13</sup>C NMR** (101 MHz, Chloroform-d)  $\delta$  155.1, 150.9, 138.4, 137.8, 137.1, 129.6, 127.9, 127.1, 122.1, 36.8, 36.6, 21.2

**HRMS** for  $C_{16}H_{17}NNaO_2^+$  ( $[M+Na]^+$ ): 278.1151; found: 278.1159

**IR** (KBr,  $cm^{-1}$ ): 2497, 1737, 1441, 1397, 1207, 1174, 803

**M.p.:** 113.5-117.5°C

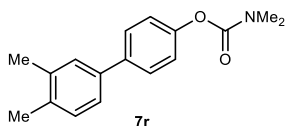

**3',4'-dimethyl-[1,1'-biphenyl]-4-yl dimethylcarbamate (7r)** was prepared according to as shown in **Scheme S4**, obtained as a brown solid, 85% yield (681.4mg, 3.0 mmol scale).

**<sup>1</sup>H NMR** (400 MHz, Chloroform-d)  $\delta$  7.55 (d,  $J$  = 8.6 Hz, 2H), 7.35 (s, 1H), 7.31 (d,  $J$  = 9.5 Hz, 1H), 7.19 (d,  $J$  = 7.8 Hz, 1H), 7.16 (d,  $J$  = 8.6 Hz, 2H), 3.12 (s, 3H), 3.03 (s, 3H), 2.33 (s, 3H), 2.30 (s, 3H)

**<sup>13</sup>C NMR** (101 MHz, Chloroform-d)  $\delta$  155.12, 150.83, 138.48, 138.33, 137.02, 135.75, 130.17, 128.49, 127.91, 124.58, 122.03, 36.86, 36.60, 20.04, 19.54.

**HRMS** for  $C_{17}H_{19}NNaO_2^+$  ( $[M+Na]^+$ ): 292.1308; found: 292.1309

**IR** (KBr,  $cm^{-1}$ ): 3602, 3030, 1714, 1500, 1390, 1213, 868, 812

**M.p.:** 64.3-67.5°C

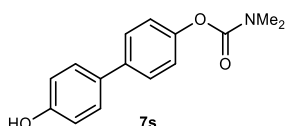

**4'-hydroxy-[1,1'-biphenyl]-4-yl dimethylcarbamate (7s)** was prepared as shown in **Scheme S4**, obtained as a yellow solid, 51% yield (390mg, 3.0 mmol scale).

**<sup>1</sup>H NMR** (600 MHz, Chloroform-d)  $\delta$  9.44 (d,  $J$  = 2.5 Hz, 1H), 7.96 (d,  $J$  = 8.9 Hz, 3H), 7.88 – 7.84 (m, 2H), 7.59 (dd,  $J$  = 9.0, 2.7 Hz, 2H), 7.39 – 7.34 (m, 2H), 3.59 (s, 3H), 3.49 (s, 3H)

**<sup>13</sup>C NMR** (151 MHz, Chloroform-d + DMSO- $D_6$ )  $\delta$  156.6, 154.5, 149.9, 137.7, 131.1, 127.5, 126.8, 121.6, 115.5, 36.3, 36.1

**HRMS** for  $C_{15}H_{15}NNaO_3^+$  ( $[M+Na]^+$ ): 280.0944; found 280.0950

**IR** (KBr,  $cm^{-1}$ ): 3393, 2928, 1715, 1612, 1397, 1212, 807

**M.p.:** 198.4-201.8°C

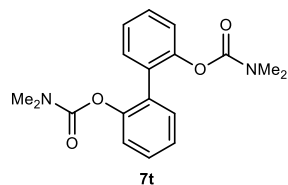

**[1,1'-biphenyl]-2,2'-diyl bis(dimethylcarbamate)<sup>28</sup> (7t)** was prepared as shown in **Scheme S3**, obtained as a yellow liquid, quantitative yield (5.0 mmol scale)

<sup>1</sup>H NMR (600 MHz, Chloroform-d) δ 7.36 (dd, *J* = 8.2, 1.7 Hz, 2H), 7.30 – 7.26 (m, 4H), 7.22 (t, *J* = 7.4 Hz, 2H), 2.83 (s, 6H), 2.72 (s, 6H).

<sup>13</sup>C NMR (101 MHz, Chloroform-d) δ 154.5, 149.1, 131.0, 130.9, 128.7, 125.0, 122.6, 36.6, 36.2

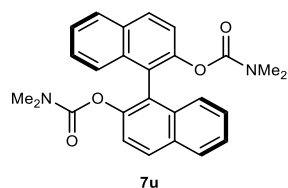

**(R)-[1,1'-binaphthalene]-2,2'-diyl bis(dimethylcarbamate)<sup>22</sup> (7u)** was prepared as shown in **Scheme S3**, obtained as a white solid, 98% yield (2.09g, 5.0 mmol scale).

<sup>1</sup>H NMR (600 MHz, Chloroform-d) δ 7.97 (d, *J* = 8.9 Hz, 2H), 7.91 (dd, *J* = 8.2, 1.1 Hz, 2H), 7.59 (d, *J* = 8.9 Hz, 2H), 7.43 (dt, *J* = 8.1, 3.9 Hz, 2H), 7.32 – 7.28 (m, 4H), 2.67 (s, 6H), 2.20 (s, 6H)

<sup>13</sup>C NMR (151 MHz, Chloroform-d) δ 154.1, 147.4, 133.3, 131.1, 128.9, 127.8, 126.4, 126.0, 125.2, 123.6, 122.5, 36.3, 35.5

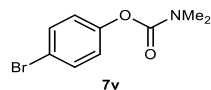

**4-bromophenyl dimethylcarbamate<sup>27</sup> (7v)** was prepared as shown in **Scheme S3**, obtained as a brown liquid, quantitative yield (5.84g, 20 mmol scale).

<sup>1</sup>H NMR (600 MHz, Chloroform-d) (d, *J* = 8.8 Hz, 2H), 7.00 (d, *J* = 8.8 Hz, 2H), 3.09 (s, 3H), 3.00 (s, 3H)

<sup>13</sup>C NMR (151 MHz, Chloroform-d) δ 154.4, 150.6, 132.2, 123.5, 118.1, 36.7, 36.4

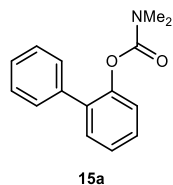

**[1,1'-biphenyl]-2-yl dimethylcarbamate<sup>22</sup> (15a)** was prepared as shown in **Scheme S3**, obtained as a colorless liquid, quantitative yield (5.0 mmol scale).

<sup>1</sup>H NMR (600 MHz, Chloroform-d) δ 7.43 (d, *J* = 7.7 Hz, 2H), 7.41 – 7.32 (m, 5H), 7.29 – 7.26 (m, 1H), 7.22 (d, *J* = 8.0 Hz, 1H), 2.89 (s, 3H), 2.88 (s, 3H)

<sup>13</sup>C NMR (151 MHz, Chloroform-d) δ 154., 148.4, 137.9, 134.8, 130.6, 129.1, 128.3, 128.0, 127.2, 125.6, 123.3, 36.6, 36.2

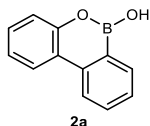

**6H-dibenzo[c,e][1,2]oxaborinin-6-ol**<sup>29</sup> (**2a**) was prepared as shown in **Scheme S5**, obtained as a white solid, quantitative yield (2.97g, 15 mmol scale)

**<sup>1</sup>H NMR** (600 MHz, Chloroform-d)  $\delta$  8.17 (d,  $J$  = 8.1 Hz, 1H), 8.14 (d,  $J$  = 8.0 Hz, 1H), 8.08 (d,  $J$  = 8.1 Hz, 1H), 7.72 (dd,  $J$  = 8.6, 7.8 Hz, 1H), 7.48 (t,  $J$  = 7.3 Hz, 1H), 7.40 – 7.37 (m, 1H), 7.28 (d,  $J$  = 8.1 Hz, 1H), 7.26 – 7.22 (m, 1H), 4.79 (s, 1H)

**<sup>13</sup>C NMR** (151 MHz): **<sup>13</sup>C NMR** (101 MHz, Chloroform-d)  $\delta$  151.3, 140.5, 133.5, 132.7, 129.1, 127.4, 123.7, 123.1, 122.8, 121.8, 119.7 (the C-B carbon not seen)

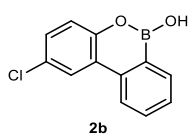

**2-chloro-6H-dibenzo[c,e][1,2]oxaborinin-6-ol** (**2b**) was prepared as shown in **Scheme S5**, obtained as a white solid, quantitative yield (119.9mg, 0.5 mmol scale).

**<sup>1</sup>H NMR** (600 MHz, Chloroform-d + DMSO-D<sub>6</sub>)  $\delta$  8.10 – 8.06 (m, 3H), 7.72 (t,  $J$  = 7.8 Hz, 1H), 7.51 (t,  $J$  = 7.4 Hz, 1H), 7.31 (dd,  $J$  = 8.7, 2.4 Hz, 1H), 7.20 (d,  $J$  = 8.6 Hz, 1H)

**<sup>13</sup>C NMR** (151 MHz, Chloroform-d + DMSO-D<sub>6</sub>)  $\delta$  150.1, 138.9, 133.7, 132.2, 128.4, 127.7, 127.3, 124.3, 123.2, 121.4, 120.9 (the C-B carbon not seen)

**HRMS** calculated for C<sub>14</sub>H<sub>13</sub>BClO<sub>3</sub><sup>-</sup> ([M+2MeOH-2H<sub>2</sub>O-H]<sup>-</sup>): 275.0652; found 275.0694 (The HRMS analysis was performed in MeOH/H<sub>2</sub>O, and the boronic acid motif transferred into corresponding dimethylborate in situ, and the HRMS was actually obtained as the dimethylborate)

**IR** (KBr, cm<sup>-1</sup>): 3299, 1556, 1491, 1371, 1098, 776

**M.p.:** 214.5-220.4°C

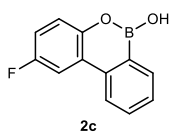

**2-fluoro-6H-dibenzo[c,e][1,2]oxaborinin-6-ol**<sup>30</sup> (**2c**) was prepared as shown in **Scheme S5**, obtained as a yellow solid, 88% yield (22.7mg, 0.12 mmol scale).

When the reaction was performed in 4.0 mmol scale (**1f**, 1.0 equivalent) with Fe(OTf)<sub>3</sub> (100.6 mg, 5 mol%) and BBr<sub>3</sub> (2.0 M in DCM, 4.0 mL, 2.0 equivalents) in 10 mL DCM at around 10°C for 20h, only 48% yield (413.1mg) of desired boronic acid obtained. While 54% yield of 5-fluoro-[1,1'-biphenyl]-2-ol (from demethylation) were obtained as byproduct.

**<sup>1</sup>H NMR** (400 MHz, Chloroform-d)  $\delta$  8.08 (d,  $J$  = 6.9 Hz, 1H), 8.05 (d,  $J$  = 8.2 Hz, 1H), 7.81 – 7.76 (m, 1H), 7.76 – 7.70 (m, 1H), 7.51 (t,  $J$  = 7.0 Hz, 1H), 7.23 (dd,  $J$  = 8.9, 5.0 Hz, 1H), 7.11 – 7.04 (m, 1H), 4.74 (b, 1H)

**<sup>13</sup>C NMR** (101 MHz, Chloroform-d)  $\delta$  151.4 (d,  $J_{C-F}$  = 82.8 Hz, 1H), 147.2, 139.5, 133.4, 132.7, 127.8, 121.8, 120.6 (d,  $^3J_{C-F}$  = 8.1 Hz, 1H), 115.9 (d,  $^2J_{C-F}$  = 24.2 Hz, 1H), 109.5 (d,  $^2J_{C-F}$  = 24.2 Hz, 1H)

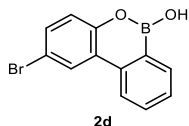

**2-bromo-6H-dibenzo[c,e][1,2]oxaborinin-6-ol**<sup>31</sup> (**2d**) was prepared as shown in **Scheme S5**, obtained as a white solid, 84% yield (274.9mg, 1.2 mmol scale).

**<sup>1</sup>H NMR** (400 MHz, Chloroform-d)  $\delta$  8.23 (d,  $J$  = 2.3 Hz, 1H), 8.08 (t,  $J$  = 6.7 Hz, 2H), 7.73 (t,  $J$  = 8.3 Hz, 1H), 7.51 (t,  $J$  = 7.4 Hz, 1H), 7.48 – 7.42 (m, 1H), 7.15 (d,  $J$  = 8.6 Hz, 1H), 4.72 (s, 1H)

**<sup>13</sup>C NMR** (101 MHz, Chloroform-d + DMSO-D<sub>6</sub>)  $\delta$  150.45, 138.79, 133.65, 132.18, 131.26, 127.61, 126.16, 124.78, 121.38, 121.23, 114.77 (the B-C not seen)

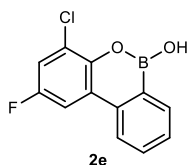

**4-chloro-2-fluoro-6H-dibenzo[c,e][1,2]oxaborinin-6-ol** (**2e**) was prepared as shown in **Scheme S5**, obtained as a white solid, 84% yield (104.5mg, 0.5 mmol scale).

**<sup>1</sup>H NMR** (600 MHz, Chloroform-d)  $\delta$  8.12 (d,  $J$  = 7.5 Hz, 1H), 8.03 (d,  $J$  = 8.1 Hz, 1H), 7.76 – 7.73 (m, 1H), 7.73 – 7.69 (m, 1H), 7.54 (t,  $J$  = 7.4 Hz, 1H), 7.23 (d,  $J$  = 7.6 Hz, 1H), 5.20 – 5.15 (br, 1H)

**<sup>13</sup>C NMR** (101 MHz, Chloroform-d)  $\delta$  156.6 (d,  $J_{C-F}$  = 242 Hz), 143.8 (d,  $^4J_{C-F}$  = 3.0 Hz), 138.5 (d,  $^4J_{C-F}$  = 3.0 Hz), 133.7, 132.2, 128.1, 124.8 (d,  $^3J_{C-F}$  = 8.0 Hz), 124.3 (d,  $^3J_{C-F}$  = 8.0 Hz), 121.7, 116.2 (d,  $^2J_{C-F}$  = 27 Hz), 108.2 (d,  $^2J_{C-F}$  = 24 Hz) (the C-B carbon not seen)

**<sup>19</sup>F NMR** (565 MHz, Chloroform-d)  $\delta$  -119.09.

**HRMS** calculated for C<sub>14</sub>H<sub>12</sub>BClFO<sub>3</sub><sup>-</sup> ([M+2MeOH-2H<sub>2</sub>O-H]<sup>-</sup>): 293.0558; found 293.0604 (The HRMS analysis was performed in MeOH/H<sub>2</sub>O, and the boronic acid motif transferred into corresponding dimethylborate in situ, and the HRMS was actually obtained as the dimethylborate)

**IR** (KBr, cm<sup>-1</sup>): 3530, 1608, 1654, 1494, 1300, 1160, 826, 776

**M.p.:** 214.5-220.4°C

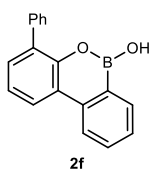

**4-phenyl-6H-dibenzo[c,e][1,2]oxaborinin-6-ol**<sup>31</sup> (**2f**) was prepared as shown in **Scheme S5**, obtained as a yellow liquid, quantitative yield (138.5mg, 0.5 mmol scale).

**<sup>1</sup>H NMR** (600 MHz, Chloroform-d)  $\delta$  8.23 (d,  $J$  = 8.3 Hz, 1H), 8.17 (d,  $J$  = 8.1 Hz, 1H), 8.11 – 8.08 (m, 1H), 7.76 – 7.72 (m, 1H), 7.61 (d,  $J$  = 8.2 Hz, 2H), 7.51 – 7.46 (m, 3H), 7.43 – 7.38 (m, 2H), 7.33 – 7.28 (m, 1H), 4.83 (s, 1H).

**<sup>13</sup>C NMR** (151 MHz, Chloroform-d)  $\delta$  148.0, 140.7, 138.6, 133.5, 132.7, 132.6, 130.6, 129.9, 128.3, 127.5, 127.4, 123.5, 123.2, 122.6, 122.0 (the C-B carbon not seen).

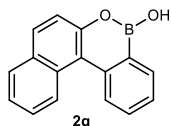

**5H-benzo[c]naphtho[1,2-e][1,2]oxaborinin-5-ol (2g)** was prepared as shown in **Scheme S5**, obtained as a yellow liquid, 85% yield (104.8 mg, 0.5 mmol scale).

**<sup>1</sup>H NMR** (600 MHz, Chloroform-d)  $\delta$  8.80 (d,  $J$  = 8.7 Hz, 1H), 8.57 (d,  $J$  = 8.2 Hz, 1H), 8.17 (d,  $J$  = 6.6 Hz, 1H), 7.91 (d,  $J$  = 8.0 Hz, 1H), 7.82 (d,  $J$  = 8.7 Hz, 1H), 7.78 – 7.74 (m, 1H), 7.60 – 7.56 (m, 1H), 7.52 (t,  $J$  = 7.3 Hz, 1H), 7.47 (t,  $J$  = 7.4 Hz, 1H), 7.42 (d,  $J$  = 8.7 Hz, 1H), 4.88 (b, 1H)

**<sup>13</sup>C NMR** (151 MHz, Chloroform-d)  $\delta$  149.6, 140.7, 133.2, 131.8, 131.1, 130.8, 129.7, 128.7, 127.2, 126.6, 126.5, 125.8, 124.2, 120.0, 117.4

**HRMS** calculated for  $C_{18}H_{16}BO_3^-$  ([M+2MeOH-2H<sub>2</sub>O-H]<sup>-</sup>): 291.1198; found 291.1259 (The HRMS analysis was performed in MeOH/H<sub>2</sub>O, and the boronic acid motif transferred into corresponding dimethylborate in situ, and the HRMS was actually obtained as the dimethylborate)

**IR** (KBr, cm<sup>-1</sup>): 3442, 1596, 1408, 1340, 1305, 748, 678

**M.p.:** 73-82.3°C

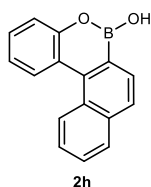

**6H-benzo[e]naphtho[2,1-c][1,2]oxaborinin-6-ol (2h)** was prepared as shown in **Scheme S5**, obtained as a solid, quantitative yield (0.5 mmol scale).

**<sup>1</sup>H NMR** (400 MHz, Chloroform-d)  $\delta$  8.82 (d,  $J$  = 9.4 Hz, 1H), 8.46 (d,  $J$  = 8.0 Hz, 1H), 8.00 (d,  $J$  = 8.1 Hz, 1H), 7.98 – 7.93 (m, 1H), 7.86 (d,  $J$  = 8.1 Hz, 1H), 7.64 – 7.56 (m, 2H), 7.44 – 7.35 (m, 2H), 7.27 (d,  $J$  = 8.3 Hz, 1H), 4.80 (s, 1H)

**<sup>13</sup>C NMR** (101 MHz, Chloroform-d)  $\delta$  151.7, 140.1, 136.8, 129.3, 129.1, 128.9, 128.5, 127.8, 127.7, 127.1, 126.8, 126.2, 123.7, 122.0, 119.4

**HRMS** calculated for  $C_{18}H_{16}BO_3^-$  ([M+2MeOH-2H<sub>2</sub>O-H]<sup>-</sup>): 291.1198; found 291.1238 (The HRMS analysis was performed in MeOH/H<sub>2</sub>O, and the boronic acid motif transferred into corresponding dimethylborate in situ, and the HRMS was actually obtained as the dimethylborate)

**IR** (KBr, cm<sup>-1</sup>): 3442, 1596, 1470, 1408, 1340, 1305, 748, 678

**M.p.:** 75.2-100.3°C

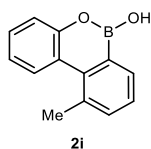

**10-methyl-6H-dibenzo[c,e][1,2]oxaborinin-6-ol (2i)** was prepared as shown in **Scheme S5**, obtained as a yellow solid, 58% yield (60.2mg, 0.5 mmol scale).

**<sup>1</sup>H NMR** (600 MHz, Chloroform-d)  $\delta$  8.29 (d,  $J$  = 8.2 Hz, 1H), 7.99 (d,  $J$  = 7.2 Hz, 1H), 7.57 – 7.54 (m, 1H), 7.41 – 7.36 (m, 2H), 7.31 (d,  $J$  = 8.1, 1H), 7.21 (dd,  $J$  = 8.5, 7.1 Hz, 1H), 4.71 (br, 1H), 2.89 (s, 3H)

**<sup>13</sup>C NMR** (151 MHz, Chloroform-d)  $\delta$  151.7, 139.5, 137.2, 134.3, 131.3, 128.3, 128.3, 126.8, 124.7,

121.8, 119.6, 25.7

**HRMS** calculated for  $C_{15}H_{17}BNaO_3^+$  ( $[M+2MeOH-2H_2O+Na]^+$ ): 279.1163; found 279.2259 (The HRMS analysis was performed in MeOH/H<sub>2</sub>O, and the boronic acid motif transferred into corresponding dimethylborate in situ, and the HRMS was actually obtained as the dimethylborate)

**IR** (KBr,  $cm^{-1}$ ): 3457, 2959, 1594, 1430, 1386, 1327, 1037, 750, 683

**M.p.:** 82.6-86.1°C

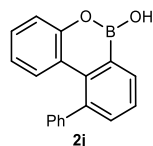

**10-phenyl-6H-dibenzo[c,e][1,2]oxaborinin-6-ol (2j)** was prepared as shown in **Scheme S5**, obtained as a white solid, 79% yield (107.1mg, 0.5 mmol scale).

**<sup>1</sup>H NMR** (600 MHz, Chloroform-d)  $\delta$  8.11 (d,  $J = 7.2$  Hz, 1H), 7.55 (d,  $J = 5.8$  Hz, 1H), 7.49 (t,  $J = 7.4$  Hz, 1H), 7.43 (dt,  $J = 14.5, 6.9$  Hz, 3H), 7.38 – 7.36 (m, 2H), 7.24 – 7.17 (m, 3H), 6.72 – 6.68 (m, 1H), 4.78 (b, 1H).

**<sup>13</sup>C NMR** (101 MHz, Chloroform-d)  $\delta$  151.9, 144.1, 139.6, 138.3, 136.7, 132.7, 129.5, 129.1, 129.1, 128.5, 127.4, 126.7, 123.3, 121.4, 119.5 (one carbon was buried in other peaks)

**HRMS** calculated for  $C_{20}H_{18}BO_3^-$  ( $[M+2MeOH-2H_2O-H]^-$ ): 317.1354; found 317.1395 (The HRMS analysis was performed in MeOH/H<sub>2</sub>O, and the boronic acid motif transferred into corresponding dimethylborate in situ, and the HRMS was actually obtained as the dimethylborate)

**IR** (KBr,  $cm^{-1}$ ): 3447, 1590, 1429, 1365, 1330, 861

**M.p.:** 83.4-93.1°C

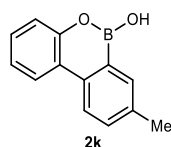

**8-methyl-6H-dibenzo[c,e][1,2]oxaborinin-6-ol<sup>32</sup> (2k)** was prepared as shown in **Scheme S5**, obtained as a gray solid, 95% yield (199.1mg, 1.1 mmol scale).

**<sup>1</sup>H NMR** (600 MHz, Chloroform-d)  $\delta$  8.13 (dd,  $J = 8.0, 1.4$  Hz, 1H), 7.99 – 7.95 (m, 2H), 7.38 – 7.35 (m, 1H), 7.30 (d,  $J = 7.5$  Hz, 1H), 7.28 – 7.26 (m, 1H), 7.22 (t,  $J = 7.6$  Hz, 1H), 4.82 (s, 1H), 2.53 (s, 3H)

**<sup>13</sup>C NMR** (151 MHz, Chloroform-d)  $\delta$  151.3, 142.8, 140.4, 133.3, 128.8, 128.5, 123.5, 123.0, 122.5, 122.0, 119.5, 22.3

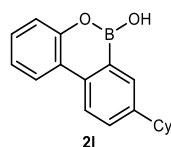

**8-cyclohexyl-6H-dibenzo[c,e][1,2]oxaborinin-6-ol (2l)** was prepared as shown in **Scheme S5**, obtained as a yellow solid, quantitative yield (140.6 mg, 0.5 mmol scale)

**<sup>1</sup>H NMR** (600 MHz, Chloroform-d)  $\delta$  7.99 (t,  $J = 7.9$  Hz, 2H), 7.80 (s, 1H), 7.46 (d,  $J = 8.2$  Hz, 1H), 7.23 (t,  $J = 7.5$  Hz, 1H), 7.15 (d,  $J = 7.8$  Hz, 1H), 7.10 (t,  $J = 7.3$  Hz, 1H), 4.69 (s, 1H), 2.52 (t,  $J = 11.7$  Hz, 1H), 1.83 (d,  $J = 12.7$  Hz, 2H), 1.77 (d,  $J = 12.8$  Hz, 2H), 1.67 (d,  $J = 12.9$  Hz, 1H), 1.41 (q,  $J = 12.4$



Hz, 2H), 1.32 (q,  $J = 12.9$  Hz, 3H), 1.18 (q,  $J = 11.1$  Hz, 2H)

$^{13}\text{C NMR}$  (151 MHz, Chloroform- $d$ )  $\delta$  151.0, 147.3, 138.3, 131.8, 131.3, 128.6, 123.5, 123.3, 122.8, 121.8, 119.6, 44.6, 34.5, 27.0, 26. (the C-B was not seen)

**HRMS** calculated for  $\text{C}_{19}\text{H}_{21}\text{BNaO}_2^+$  ( $[\text{M}+\text{MeOH}-\text{H}_2\text{O}+\text{Na}]^+$ ): 315.1527; found 315.1522 (The HRMS analysis was performed in MeOH/ $\text{H}_2\text{O}$ , and the boronic acid motif transferred into corresponding methylborate in situ, and the HRMS was actually obtained as the methylborate)

**IR** (KBr,  $\text{cm}^{-1}$ ): 3460, 2850, 1611, 1485, 1309, 1035, 752, 682

**M.p.:** 176.9-180.5°C

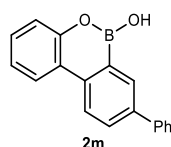

**8-phenyl-6H-dibenzo[c,e][1,2]oxaborinin-6-ol (2m)** was prepared as shown in **Scheme S5**, obtained as a white solid, quantitative yield (137.5 mg, 0.5 mmol scale).

When the reaction was performed in 4.0 mmol scale (**1p**, 1.0 equivalent) with  $\text{Fe}(\text{OTf})_3$  (201.2 mg, 10 mol%) and  $\text{BBr}_3$  (2.0 M in DCM, 6.0 mL, 3.0 equivalents) in 10 mL DCM at room temperature for overnight, quantitative yield of product was obtained (1.14 g)

$^1\text{H NMR}$  (600 MHz, Chloroform- $d$ )  $\delta$  8.40 (d,  $J = 2.1$  Hz, 1H), 8.15 (d,  $J = 8.4$  Hz, 1H), 8.08 (dd,  $J = 8.0$  Hz, 1H), 7.87 (dd,  $J = 8.4, 2.1$  Hz, 1H), 7.70 – 7.65 (m, 2H), 7.41 (t,  $J = 7.7$  Hz, 2H), 7.33 – 7.27 (m, 2H), 7.23 (d,  $J = 8.1$  Hz, 1H), 7.15 (dd,  $J = 8.1, 7.2$  Hz, 1H)

$^{13}\text{C NMR}$  (151 MHz, Chloroform- $d$  +  $\text{DMSO}-d_6$ )  $\delta$  151.4, 140.3, 139.2, 139.1, 131.8, 130.6, 128.6, 127.2, 126.8, 123.4, 122.6, 122.2, 121.8, 119.4 (the C-B cannot be seen).

**HRMS** calculated for  $\text{C}_{19}\text{H}_{15}\text{BNaO}_2^+$  ( $[\text{M}+\text{MeOH}-\text{H}_2\text{O}+\text{Na}]^+$ ): 309.1057; found 309.1043 (The HRMS analysis was performed in MeOH/ $\text{H}_2\text{O}$ , and the boronic acid motif transferred into corresponding methylborate in situ, and the HRMS was actually obtained as the methylborate)

**IR** (KBr,  $\text{cm}^{-1}$ ): 3445, 1482, 1391, 1312, 855, 761, 694

**M.p.:** 257.4-271.2°C

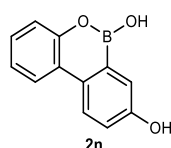

**6H-dibenzo[c,e][1,2]oxaborinine-6,8-diol (2n)** was prepared as shown in **Scheme S5**, obtained as a white solid, 65% yield (150.8 mg, 1.1 mmol scale)

$^1\text{H NMR}$  (600 MHz, Chloroform- $d$ )  $\delta$  8.10 – 8.06 (m, 3H), 7.72 (t,  $J = 7.8$  Hz, 1H), 7.51 (t,  $J = 7.4$  Hz, 1H), 7.31 (dd,  $J = 8.7, 2.4$  Hz, 1H), 7.20 (d,  $J = 8.6$  Hz, 1H), 4.82 (s, 1H)

$^{13}\text{C NMR}$  (151 MHz, Chloroform- $d$  +  $\text{DMSO}-d_6$ )  $\delta$  149.9, 138.7, 133.6, 132.1, 128.3, 127.5, 127.1, 124.1, 123.0, 121.3, 120.7 (the C-B cannot be seen)

**HRMS** calculated for  $\text{C}_{14}\text{H}_{14}\text{BO}_4^-$  ( $[\text{M}+2\text{MeOH}-2\text{H}_2\text{O}-\text{H}]^-$ ): 257.0991; found 257.0979 (The HRMS analysis was performed in MeOH/ $\text{H}_2\text{O}$ , and the boronic acid motif transferred into corresponding dimethylborate in situ, and the HRMS was actually obtained as the dimethylborate)

**IR** (KBr,  $\text{cm}^{-1}$ ): 3453, 3330, 1614, 1461, 1327, 741

**M.p.:** 282.7-297.8°C

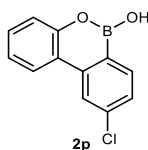

**9-chloro-6H-dibenzo[c,e][1,2]oxaborinin-6-ol<sup>30</sup> (2p)** was prepared as shown in **Scheme S5**, obtained as a white solid, 86% yield (97.9mg, 0.5 mmol scale).

**<sup>1</sup>H NMR** (600 MHz, Chloroform-d)  $\delta$  8.11 (d,  $J$  = 1.8 Hz, 1H), 8.05 (d,  $J$  = 8.0 Hz, 1H), 8.00 (d,  $J$  = 8.0 Hz, 1H), 7.43 (d,  $J$  = 8.0 Hz, 1H), 7.40 (dd,  $J$  = 8.6, 7.2 Hz, 1H), 7.28 (s, 1H), 7.24 (td,  $J$  = 8.4, 7.9 Hz, 1H), 4.78 (s, 1H)

**<sup>13</sup>C NMR** (151 MHz, Chloroform-d)  $\delta$  151.4, 142.1, 139.2, 134.9, 129.7, 127.5, 123.7, 122.9, 121.9, 121.8, 119.7 (the C-B does not show)

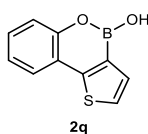

**4H-benzo[e]thieno[3,2-c][1,2]oxaborinin-4-ol (2q)** was prepared as shown in **Scheme S5**, obtained as a white solid, 45% yield (44.8mg, 0.5 mmol scale).

**<sup>1</sup>H NMR** (600 MHz, Chloroform-d)  $\delta$  7.76 (d,  $J$  = 7.7 Hz, 1H), 7.47 (d,  $J$  = 4.8 Hz, 1H), 7.39 (d,  $J$  = 4.9 Hz, 1H), 7.36 (t,  $J$  = 7.7 Hz, 1H), 7.32 (d,  $J$  = 8.1 Hz, 1H), 7.20 (s, 1H), 4.80 (s, 1H)

**<sup>13</sup>C NMR** (151 MHz, Chloroform-d)  $\delta$  153.7, 150.2, 129.7, 128.6, 125.1, 124.4, 122.8, 121.3, 119.0 (the C-B does not show).

**HRMS** calculated for  $C_{12}H_{13}BKO_3S^+$  [ $M+2MeOH-2H_2O+K$ ]<sup>+</sup>: 287.0310; found 287.0234 (The HRMS analysis was performed in MeOH/H<sub>2</sub>O, and the boronic acid motif transferred into corresponding dimethylborate in situ, and the HRMS was actually obtained as the dimethylborate.)

**IR** (KBr, cm<sup>-1</sup>): 3342, 1579, 1517, 1451, 1350, 1268, 837, 744

**M.p.:** 84.4-87.3°C

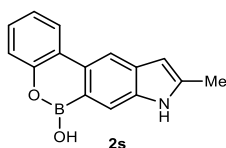

**9-methylbenzo[5,6][1,2]oxaborinino[4,3-f]indol-6(8H)-ol (2s)** was prepared as shown in **Scheme S5**, obtained as a brown solid, 62% yield (77.2mg, 0.5 mmol scale).

**<sup>1</sup>H NMR** (600 MHz, Chloroform-d + DMSO-d<sub>6</sub>)  $\delta$  9.97 (m, 1H), 8.74 (s, 1H), 8.65 (s, 1H), 8.58 (s, 1H), 8.39 (m, 1H), 7.71 (m, 2H), 7.63 (s, 1H), 6.76 (s, 1H), 2.92 (s, 3H).

**<sup>13</sup>C NMR** (151 MHz, Chloroform-d + DMSO-d<sub>6</sub>)  $\delta$  150.5, 139.0, 135.9, 132.8, 130.9, 126.8, 124.3, 122.8, 121.8, 119.1, 117.2, 114.8, 111.7, 100.0, 29.4, 13.6

**HRMS** calculated for  $C_{16}H_{13}BNO_2^-$  ([ $M+MeOH-H_2O-H$ ])<sup>-</sup>: 262.1045; found 262.0934 (The HRMS analysis was performed in MeOH/H<sub>2</sub>O, and the boronic acid motif transferred into corresponding dimethylborate in situ, and the HRMS was actually obtained as the methylborate.)

**IR** (KBr, cm<sup>-1</sup>): 3465, 3415, 1455, 1405, 1323, 1302, 866, 748, 698

**M.p.:** 144.4-162.8°C

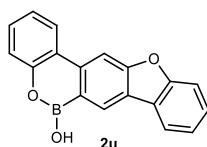

**benzo[b]benzo[5,6][1,2]oxaborinino[3,4-f]benzofuran-6-ol (2u)** was prepared as shown in **Scheme S5**, obtained as a white solid, 90% yield (128.5mg, 0.5 mmol scale).

**<sup>1</sup>H NMR** (600 MHz, DMSO-*d*<sub>6</sub> + Chloroform-*d*) δ 8.53 (d, *J* = 6.9 Hz, 2H), 8.14 (s, 1H), 8.07 (d, *J* = 7.8 Hz, 1H), 7.90 (d, *J* = 7.6 Hz, 1H), 7.40 (d, *J* = 8.2 Hz, 1H), 7.33 (t, *J* = 7.7 Hz, 1H), 7.22 – 7.17 (m, 1H), 7.14 (t, *J* = 7.5 Hz, 1H), 7.08 (d, *J* = 7.9 Hz, 1H), 7.04 (t, *J* = 7.0 Hz, 1H)

**<sup>13</sup>C NMR** (101 MHz, DMSO-*d*<sub>6</sub>) δ 156.4, 154.6, 150.7, 135.0, 128.9, 128.7, 127.9, 124.7, 124.1, 123.4, 123.3, 122.6, 122.5, 122.0, 119.3, 115.1, 115.0, 111.9

**HRMS** calculated for C<sub>20</sub>H<sub>16</sub>BO<sub>4</sub><sup>-</sup> ([M+2MeOH-2H<sub>2</sub>O-H]<sup>-</sup>): 331.1147; found 331.1199 (The HRMS analysis was performed in MeOH/H<sub>2</sub>O, and the boronic acid motif transferred into corresponding dimethylborate in situ, and the HRMS was actually obtained as the dimethylborate.)

**IR** (KBr, cm<sup>-1</sup>): 3466, 1425, 1317, 1187, 1029, 740, 726

**M.p.:** 203.5-247.5°C

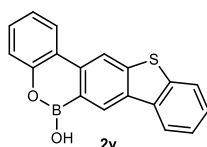

**6H-benzo[e]benzo[4',5']thieno[2',3':4,5]benzo[1,2-c][1,2]oxaborinin-6-ol (2v)** was prepared as shown in **Scheme S5**, obtained as a light yellow solid, 69% yield (104.9mg, 0.5 mmol scale).

**<sup>1</sup>H NMR** (600 MHz, DMSO-*d*<sub>6</sub>) δ 9.55 (m, 1H), 9.37 (m, 1H), 8.73 (s, 1H), 8.65 (d, *J* = 8.6 Hz, 2H), 8.08 (s, 1H), 7.60 (m, 2H), 7.47 – 7.42 (m, 1H), 7.34 – 7.27 (m, 2H)

**<sup>13</sup>C NMR** (101 MHz, DMSO-*d*<sub>6</sub>) δ 151.0, 139.7, 138.8, 137.4, 136.2, 135.0, 129.1, 128.1, 127.9, 124.9, 124.3, 123.2, 123.2, 122.7, 122.5, 119.3, 115.5

**HRMS** calculated for C<sub>20</sub>H<sub>16</sub>BO<sub>3</sub>S<sup>-</sup> ([M+2MeOH-2H<sub>2</sub>O-H]<sup>-</sup>): 347.0919; found 347.0976 (The HRMS analysis was performed in MeOH/H<sub>2</sub>O, and the boronic acid motif transferred into corresponding dimethylborate in situ, and the HRMS was actually obtained as the dimethylborate.)

**IR** (KBr, cm<sup>-1</sup>): 3477, 1534, 1464, 1396, 1317, 1311, 1293, 843, 793

**M.p.:** 250.7-267.9°C

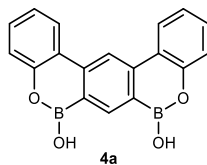

**Bis-6H-dibenzo[c,e][1,2]oxaborinin-6-ol(4a)** was prepared as shown in **Scheme S7**, obtained as a yellow solid, quantitative yield (157.4mg, 0.5 mmol scale).

**<sup>1</sup>H NMR** (600 MHz, DMSO-*d*<sub>6</sub>) δ 9.53 (s, 2H), 9.13 (s, 1H), 8.84 (s, 1H), 8.75 (d, *J* = 7.4 Hz, 2H), 7.49 (t, *J* = 7.2 Hz, 2H), 7.30 (d, *J* = 7.7 Hz, 4H)

**<sup>13</sup>C NMR** (151 MHz, DMSO-*d*<sub>6</sub>) δ 152.3, 143.3, 140.8, 130.5, 125.6, 124.1, 122.9, 122.9, 119.8, 114.8

**HRMS** calculate for  $C_{20}H_{16}B_2NaO_4^+$  [ $M+2MeOH-2H_2O+Na^+$ ]: 365.1127; found 365.1197 (The HRMS analysis was performed in MeOH/ $H_2O$ , and the boronic acid motif transferred into corresponding dimethylborate in situ, and the HRMS was actually obtained as the dimethylborate.)

**IR** (KBr,  $cm^{-1}$ ): 3471, 1611, 1532, 1381, 1322, 740

**M.p.:** >316°C

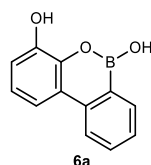

**6H-dibenzo[c,e][1,2]oxaborinine-4,6-diol (6a)** was prepared as shown in **Scheme S5**. 99% yield (104.9 mg, from **5a**, 0.5 mmol scale) of desired product was obtained as a purple solid.

When the reaction of substrate **5b** (0.5 mmol, 1.0 equivalent) was performed with  $BBr_3$  (1.0 M in DCM, 0.75 mL, 1.5 equivalents) but without  $Fe(OTf)_3$ , 44% yield (46.3 mg) of product **6a** was obtained.

**$^1H$  NMR** (600 MHz, Chloroform- $d$  +  $DMSO-D_6$ )  $\delta$  8.39 (s, 1H), 8.07 (d,  $J = 7.3$  Hz, 1H), 8.03 (d,  $J = 8.1$  Hz, 1H), 7.59 (t,  $J = 7.5$  Hz, 1H), 7.53 (d,  $J = 7.9$  Hz, 1H), 7.36 (t,  $J = 7.2$  Hz, 2H), 6.97 (t,  $J = 7.9$  Hz, 1H), 6.91 (d,  $J = 7.6$  Hz, 1H)

**$^{13}C$  NMR** (151 MHz, Chloroform- $d$  +  $DMSO-D_6$ )  $\delta$  146.1, 139.5, 139.1, 132.9, 131.4, 126.2, 122.4, 121.3, 121.3, 121.0, 114.1, 113.3

**HRMS** calculated for  $C_{14}H_{14}BO_4^-$  ( $[M+2MeOH-2H_2O-H]^-$ ): 257.0991; found 257.0979 (The HRMS analysis was performed in MeOH/ $H_2O$ , and the boronic acid motif transferred into corresponding dimethylborate in situ, and the HRMS was actually obtained as the dimethylborate)

**IR** (KBr,  $cm^{-1}$ ): 3447, 3392, 1564, 1500, 1359, 1292, 750

**M.p.:** >317°C

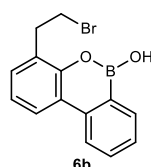

**4-(2-bromoethyl)-6H-dibenzo[c,e][1,2]oxaborinin-6-ol (6b)** was prepared according to General procedure A, obtained as a gray solid, quantitative yield (349.3 mg, 1.1 mmol scale).

**$^1H$  NMR** (600 MHz, Chloroform- $d$ )  $\delta$  8.16 (d,  $J = 8.2$  Hz, 1H), 8.08 (t,  $J = 6.7$  Hz, 2H), 7.74 – 7.70 (m, 1H), 7.48 (t,  $J = 7.3$  Hz, 1H), 7.28 (d,  $J = 8.6$  Hz, 1H), 7.19 (t,  $J = 7.7$  Hz, 1H), 4.88 (s, 1H), 3.68 (t,  $J = 7.7$  Hz, 2H), 3.42 (t,  $J = 7.7$  Hz, 2H)

**$^{13}C$  NMR** (101 MHz, Chloroform- $d$ )  $\delta$  149.3, 140.5, 133.4, 132.8, 130.3, 128.9, 127.4, 123.2, 122.9, 122.5, 122.0, 34.7, 32.1

**HRMS** calculate for  $C_{15}H_{14}BBrNaO_2^+$  [ $M+MeOH-H_2O+Na^+$ ]: 339.0162; found 339.0153 (The HRMS analysis was performed in MeOH/ $H_2O$ , and the boronic acid motif transferred into corresponding methylborate in situ, and the HRMS was actually obtained as the methylborate)

**IR** (KBr,  $cm^{-1}$ ): 3477, 2932, 1603, 1561, 1494, 1368, 1394, 758, 621

**M.p.:** 157.2-171.9°C

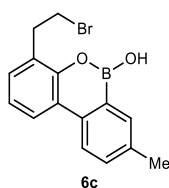

**4-(2-bromoethyl)-8-methyl-6H-dibenzo[*c,e*][1,2]oxaborinin-6-ol (6c)** was prepared as shown in **Scheme S5**, obtained as a gray solid, quantitative yield (342.3mg, 1.1 mmol).

**<sup>1</sup>H NMR** (600 MHz, Chloroform-*d*) δ 8.00 – 7.94 (m, 2H), 7.80 (s, 1H), 7.45 (d, *J* = 8.2 Hz, 1H), 7.17 (d, *J* = 9.9 Hz, 1H), 7.09 (t, *J* = 7.6 Hz, 1H), 4.74 (s, 1H), 3.60 (t, *J* = 7.7 Hz, 2H), 3.33 (t, *J* = 7.7 Hz, 2H), 2.39 (s, 3H)

**<sup>13</sup>C NMR** (101 MHz, Chloroform-*d*) δ 148.8, 137.8, 137.0, 133.8, 133.4, 129.7, 128.6, 123.2, 122.5, 122.3, 121.9, 34.6, 32.0, 21.2 (the C-B did not show)

**HRMS** calculate for C<sub>16</sub>H<sub>16</sub>BBrNaO<sub>2</sub><sup>+</sup> [M+MeOH-H<sub>2</sub>O+Na]<sup>+</sup>: 355.0298; found 355.0297 (The HRMS analysis was performed in MeOH/H<sub>2</sub>O, and the boronic acid motif transferred into corresponding methylborate in situ, and the HRMS was actually obtained as the methylborate)

**IR** (KBr, cm<sup>-1</sup>): 3395, 2966, 1500, 1322, 1209, 792, 751

**M.p.:** 177.2 189.5°C

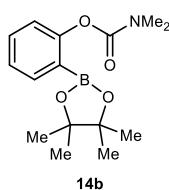

**2-(4,4,5,5-tetramethyl-1,3,2-dioxaborolan-2-yl)phenyl dimethylcarbamate<sup>32</sup> (14b)** was prepared as shown in **Scheme S6**, obtained as a pale-yellow liquid, 86% yield (125.1mg, 0.5 mmol scale).

**<sup>1</sup>H NMR** (600 MHz, Chloroform-*d*) δ 7.76 (d, *J* = 7.4 Hz, 1H), 7.43 (t, *J* = 8.0 Hz, 1H), 7.19 (t, *J* = 7.4 Hz, 1H), 7.07 (d, *J* = 8.1 Hz, 1H), 3.14 (s, 3H), 3.00 (s, 3H), 1.31 (s, 12H)

**<sup>13</sup>C NMR** (151 MHz, Chloroform-*d*) δ 156.4, 155.7, 136.2, 132.3, 124.9, 122.2, 83.5, 36.7, 36.5, 24.9 (the C-B did not show)

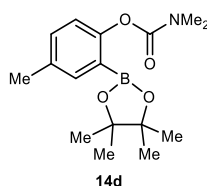

**6-hydroxy-6H-dibenzo[*c,e*][1,2]oxaborinine-3-carbonitrile (14d)** was prepared as shown in **Scheme S6**, obtained as a yellow liquid, 89% yield (136mg, 0.5 mmol scale)

**<sup>1</sup>H NMR** (600 MHz, Chloroform-*d*) δ 7.56 (s, 1H), 7.23 (d, *J* = 8.1 Hz, 1H), 6.95 (d, *J* = 8.1 Hz, 1H), 3.13 (s, 3H), 2.99 (s, 3H), 2.32 (s, 3H), 1.31 (s, 12H)

**<sup>13</sup>C NMR** (151 MHz, Chloroform-*d*) δ 156.0, 154.4, 136.7, 134.4, 133.0, 122.0, 83.6, 36.8, 36.6, 25.1, 20.8 (the C-B did not show)

**HRMS** calculated for C<sub>16</sub>H<sub>24</sub>BNNaO<sub>4</sub><sup>+</sup> ([M+Na]<sup>+</sup>): 328.1691; found 328.1703

**IR** (KBr, cm<sup>-1</sup>): 2981, 1728, 1392, 1351, 1220, 1173, 1070, 857

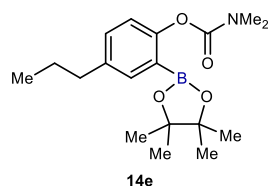

**2-((dimethylcarbamoyloxy)-5-propylphenyl)boronic acid (14e)** was prepared as shown in **Scheme S6**, obtained as a pale-yellow liquid, 97% yield (160.8mg, 0.5 mmol scale).

**<sup>1</sup>H NMR** (600 MHz, Chloroform-d)  $\delta$  7.55 (d,  $J$  = 2.3 Hz, 1H), 7.23 (d,  $J$  = 8.2 Hz, 1H), 6.97 (d,  $J$  = 8.2 Hz, 1H), 3.12 (s, 3H), 2.99 (s, 3H), 2.58 – 2.54 (m, 2H), 1.65 – 1.61 (m, 2H), 1.31 (s, 12H), 0.92 (t,  $J$  = 7.3 Hz, 3H)

**<sup>13</sup>C NMR** (151 MHz, Chloroform-d)  $\delta$  155.8, 154.4, 139.0, 136.0, 132.2, 121.8, 83.4, 37.3, 36.6, 36.4, 24.9, 24.6, 13.8

**HRMS** calculated for  $C_{18}H_{28}BNNaO_4^+$  ( $[M+Na]^+$ ): 356.2004; found 356.2000

**IR** (KBr,  $cm^{-1}$ ): 2980, 2928, 1720, 1387, 1213, 1166, 859

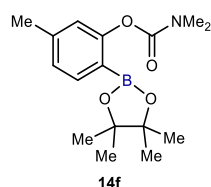

**5-methyl-2-(4,4,5,5-tetramethyl-1,3,2-dioxaborolan-2-yl)phenyl dimethylcarbamate (14f)** was prepared as shown in **Scheme S6**, obtained as a pale-yellow liquid, quantitative yield (156.3mg, 0.5 mmol scale).

**<sup>1</sup>H NMR** (600 MHz, Chloroform-d)  $\delta$  7.65 (d,  $J$  = 7.5 Hz, 1H), 7.03 – 6.98 (m, 1H), 6.90 (t,  $J$  = 1.1 Hz, 1H), 3.12 (s, 3H), 2.99 (s, 3H), 2.34 (s, 3H), 1.30 (s, 12H)

**<sup>13</sup>C NMR** (151 MHz, Chloroform-d)  $\delta$  156.4, 155.7, 142.9, 136.1, 125.8, 122.9, 83.3, 36.6, 36.4, 24.9, 21.4

**HRMS** calculated for  $C_{16}H_{24}BNNaO_4^+$  ( $[M+Na]^+$ ): 328.1691; found 328.1697

**IR** (KBr,  $cm^{-1}$ ): 3500 (br), 2978, 2928, 1725, 1620, 1390, 1168, 1069, 859

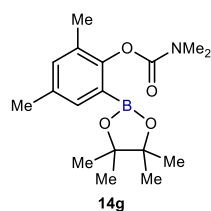

**2,4-dimethyl-6-(4,4,5,5-tetramethyl-1,3,2-dioxaborolan-2-yl)phenyl dimethylcarbamate (14g)** was prepared as shown in **Scheme S6**, obtained as a pale-yellow liquid, 95% yield (152mg, 0.5 mmol scale).

**<sup>1</sup>H NMR** (600 MHz, Chloroform-d)  $\delta$  7.39 (s, 1H), 7.09 (s, 1H), 3.14 (s, 3H), 3.00 (s, 3H), 2.28 (s, 3H), 2.16 (s, 3H), 1.30 (s, 12H)

**<sup>13</sup>C NMR** (151 MHz, Chloroform-d)  $\delta$  155.4, 152.5, 134.6, 134.2, 134.2, 130.1, 83.3, 24.9, 20.6, 16.1 (one carbon cannot be seen)

HRMS calculated for  $C_{17}H_{26}BNNaO_4^+$   $[M+Na]^+$ : 342.1847; found 342.1842

IR (KBr,  $cm^{-1}$ ): 3465, 2982, 2929, 1722, 1385, 1362, 1171, 969, 852

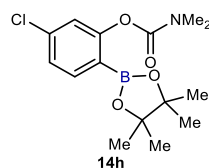

**5-chloro-2-(4,4,5,5-tetramethyl-1,3,2-dioxaborolan-2-yl)phenyl dimethylcarbamate**<sup>33</sup> (**14h**) was prepared as shown in **Scheme S6**, obtained as a pale-yellow liquid, 70% yield (101.1 mg, 0.5 mmol scale).

<sup>1</sup>H NMR (600 MHz, Chloroform-*d*)  $\delta$  7.69 (d,  $J = 7.6$  Hz, 1H), 7.18 (d,  $J = 7.3$  Hz, 1H), 7.11 (s, 1H), 3.12 (s, 3H), 3.00 (s, 3H), 1.30 (s, 13H)

<sup>13</sup>C NMR (151 MHz, Chloroform-*d*)  $\delta$  157.0, 155.3, 137.8, 137.1, 125.4, 123.0, 83.8, 36.9, 36.6, 25.1

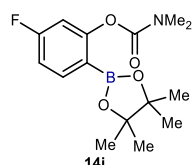

**5-fluoro-2-(4,4,5,5-tetramethyl-1,3,2-dioxaborolan-2-yl)phenyl dimethylcarbamate**<sup>35</sup> (**14i**) was prepared as shown in **Scheme S6**, obtained as a pale-yellow liquid, 89% yield (136.4mg, 0.5 mmol scale).

<sup>1</sup>H NMR (600 MHz, Chloroform-*d*)  $\delta$  7.74 (t,  $J = 7.5$  Hz, 1H), 6.91 (t,  $J = 8.3$  Hz, 1H), 6.83 (d,  $J = 9.8$  Hz, 1H), 3.13 (s, 3H), 3.00 (s, 3H), 1.30 (s, 13H)

<sup>13</sup>C NMR (151 MHz, Chloroform-*d*)  $\delta$  165.3 (d,  $J_{C-F} = 250.7$  Hz), 157.9 (d,  $^3J_{C-F} = 10.1$  Hz), 155.2, 137.7 (d,  $^3J_{C-F} = 6$  Hz), 112.3 (d,  $^2J_{C-F} = 19.6$  Hz), 110.4 (d,  $^2J_{C-F} = 24.2$  Hz), 83.7, 36.8, 36.6, 25.1

HRMS calculated for  $C_{15}H_{21}BFNNaO_4^+$   $[M+Na]^+$ : 332.1440; found 332.1451

IR (KBr,  $cm^{-1}$ ): 3456, 2979, 2962, 1782, 1605, 1388, 1166, 1072, 858

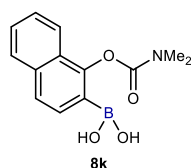

**1-((dimethylcarbamoyl)oxy)naphthalen-2-ylboronic acid** (**8k**) was prepared as shown in **Scheme S6**, obtained as a white solid, 87% yield (112.7mg, 0.5 mmol scale).

<sup>1</sup>H NMR (600 MHz, Chloroform-*d*)  $\delta$  7.99 (t,  $J = 7.0$  Hz, 2H), 7.88 – 7.83 (m, 1H), 7.72 (d,  $J = 8.2$  Hz, 1H), 7.53 – 7.46 (m, 2H), 2.99 (s, 3H), 2.87 (s, 3H)

<sup>13</sup>C NMR (151 MHz, Chloroform-*d*)  $\delta$  156.0, 151.3, 135.5, 130.8, 127.8, 126.5, 126.0, 125.9, 124.6, 121.3, 36.6, 36.3 (the C-B did not show)

HRMS calculated for  $C_{15}H_{18}BNNaO_4^+$  ( $[M+2MeOH-2H_2O+Na]^+$ ): 310.1221; found 310.1221 (The HRMS analysis was performed in MeOH/H<sub>2</sub>O, and the boronic acid motif transferred into corresponding dimethylborate in situ, and the HRMS was actually obtained as the dimethylborate.)

IR (KBr,  $\text{cm}^{-1}$ ): 3454, 1720, 1664, 1482, 1352, 1249, 1172, 751

M.p.: 132.2-175.2°C

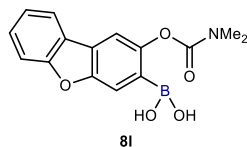

**2-((dimethylcarbamoyl)oxy)dibenzo[b,d]furan-3-ylboronic acid (8I)** was prepared as shown in **Scheme S6**, obtained as a white solid, 76% yield (113.2mg, 0.5 mmol scale).

$^1\text{H NMR}$  (600 MHz, Chloroform- $d$ )  $\delta$  8.11 (s, 1H), 7.92 (d,  $J = 7.7$  Hz, 1H), 7.65 (s, 1H), 7.58 (d,  $J = 8.2$  Hz, 1H), 7.48 (t,  $J = 7.7$  Hz, 1H), 7.34 (t,  $J = 7.5$  Hz, 1H), 2.96 (s, 3H), 2.95 (s, 3H)

$^{13}\text{C NMR}$  (151 MHz, Chloroform- $d$ )  $\delta$  157.2, 156.5, 153.8, 151.0, 127.7, 126.0, 124.2, 122.6, 120.9, 117.3, 111.9, 111.6, 111.5, 36.6, 36.2

**HRMS** calculated for  $\text{C}_{17}\text{H}_{18}\text{BNNaO}_5^+$  ( $[\text{M}+2\text{MeOH}-2\text{H}_2\text{O}+\text{Na}]^+$ ): 350.1170; found 350.1197 (The HRMS analysis was performed in MeOH/ $\text{H}_2\text{O}$ , and the boronic acid motif transferred into corresponding dimethylborate in situ, and the HRMS was actually obtained as the dimethylborate.)

IR (KBr,  $\text{cm}^{-1}$ ): 3450, 2929, 1728, 1661, 1394, 1265, 1169, 1145, 861, 750

M.p.: 151.3-171.9°C

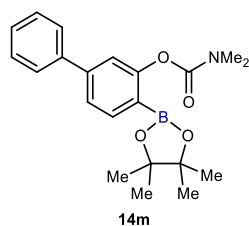

**4-(4,4,5,5-tetramethyl-1,3,2-dioxaborolan-2-yl)-[1,1'-biphenyl]-3-yl dimethylcarbamate (14m)** was prepared as shown in **Scheme S6**, obtained as a colorless liquid, 86% yield (156.8mg, 0.5 mmol scale).

$^1\text{H NMR}$  (600 MHz, Chloroform- $d$ )  $\delta$  7.83 (d,  $J = 7.7$  Hz, 1H), 7.60 (d,  $J = 8.3$  Hz, 2H), 7.45 – 7.40 (m, 3H), 7.36 – 7.33 (m, 1H), 7.32 (d,  $J = 1.6$  Hz, 1H), 3.16 (s, 3H), 3.02 (s, 3H), 1.33 (s, 12H)

$^{13}\text{C NMR}$  (151 MHz, Chloroform- $d$ )  $\delta$  156.8, 155.6, 145.3, 140.1, 136.6, 128.7, 127.7, 127.2, 123.5, 120.8, 83.5, 36.7, 36.5, 24.9 (the C-B did not show)

**HRMS** calculated for  $\text{C}_{21}\text{H}_{26}\text{BNNaO}_4^+$  ( $[\text{M}+\text{Na}]^+$ ): 390.1847; found 390.1853

IR (KBr,  $\text{cm}^{-1}$ ): 3500(br), 2981, 1728, 1617, 1384, 1358, 1189, 1081, 862, 769

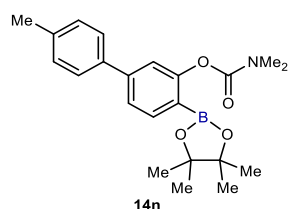

**4'-methyl-4-(4,4,5,5-tetramethyl-1,3,2-dioxaborolan-2-yl)-[1,1'-biphenyl]-3-yl**

**dimethylcarbamate (14n)** was prepared as shown in **Scheme S6**, obtained as a yellow liquid, 87% yield (165.9mg, 0.5 mmol scale).



**<sup>1</sup>H NMR** (600 MHz, Chloroform-d)  $\delta$  7.81 (d,  $J$  = 7.7 Hz, 1H), 7.50 (d,  $J$  = 7.9 Hz, 2H), 7.42 (d,  $J$  = 7.7 Hz, 1H), 7.30 (s, 1H), 7.23 (d,  $J$  = 7.9 Hz, 2H), 3.16 (s, 3H), 3.02 (s, 3H), 2.38 (s, 3H), 1.32 (s, 12H)  
**<sup>13</sup>C NMR** (151 MHz, Chloroform-d)  $\delta$  156.8, 155.7, 145.2, 137.6, 137.2, 136.6, 129.4, 127.0, 126.9, 123.3, 120.5, 83.4, 36.7, 36.5, 24.9, 21.1

**HRMS** calculated for C<sub>22</sub>H<sub>28</sub>BNNaO<sub>4</sub><sup>+</sup> [M+Na]<sup>+</sup>: 404.2004; found 404.2001

**IR** (KBr, cm<sup>-1</sup>): 1963, 2931, 1727, 1617, 1389, 1355, 1212, 1145, 812

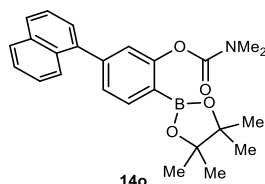

**5-(naphthalen-1-yl)-2-(4,4,5,5-tetramethyl-1,3,2-dioxaborolan-2-yl)phenyl dimethylcarbamate (14o)** was prepared as shown in **Scheme S6**, obtained as a yellow solid, 84% yield (175.2mg, 0.5 mmol scale).

**<sup>1</sup>H NMR** (400 MHz, Chloroform-d)  $\delta$  7.92 – 7.81 (m, 4H), 7.51 – 7.44 (m, 2H), 7.44 – 7.38 (m, 2H), 7.33 (d,  $J$  = 7.6, 1.5 Hz, 1H), 7.21 (d,  $J$  = 1.4 Hz, 1H), 3.14 (s, 3H), 3.00 (s, 3H), 1.33 (s, 12H)

**<sup>13</sup>C NMR** (101 MHz, Chloroform-d)  $\delta$  156.2, 155.6, 145.0, 139.2, 136.0, 133.7, 131.3, 128.3, 127.9, 126.9, 126.7, 126.2, 125.9, 125.8, 125.3, 123.8, 83.5, 36.7, 36.5, 25.0 (B-C did not show).

**HRMS** calculated for C<sub>25</sub>H<sub>28</sub>BNNaO<sub>4</sub><sup>+</sup> [M+Na]<sup>+</sup>: 440.2004; found 440.2005

**IR** (KBr, cm<sup>-1</sup>): 3383, 1634, 1579, 1333, 1174, 1054, 919, 852

**M.p.**: 125.1-130.2°C

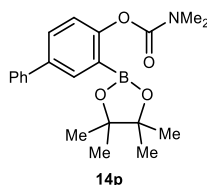

**4-((dimethylcarbamoyloxy)-[1,1'-biphenyl]-3-yl)boronic acid (14p)** was prepared as shown in **Scheme S6**, obtained as a white solid, 86% yield (104.1mg, 0.5 mmol scale).

**<sup>1</sup>H NMR** (600 MHz, Chloroform-d)  $\delta$  7.83 (d,  $J$  = 7.7 Hz, 1H), 7.60 (dd,  $J$  = 8.3, 1.2 Hz, 2H), 7.45 – 7.40 (m, 3H), 7.34 (t,  $J$  = 7.4 Hz, 1H), 7.32 (d,  $J$  = 1.6 Hz, 1H), 3.16 (s, 3H), 3.02 (s, 3H), 1.33 (s, 12H)

**<sup>13</sup>C NMR** (151 MHz, Chloroform-d)  $\delta$  156.0, 155.8, 140.8, 138.0, 135.1, 131.1, 128.7, 127.4, 127.2, 122.6, 83.7, 36.8, 36.6, 25.1

**HRMS** calculated for C<sub>21</sub>H<sub>26</sub>BNNaO<sub>4</sub><sup>+</sup> [M+Na]<sup>+</sup>: 390.1847; found 390.1848

**IR** (KBr, cm<sup>-1</sup>): 3442, 2973, 2929, 1722, 1608, 1388, 1345, 1172, 767

**M.p.**: 73.5-91.5°C

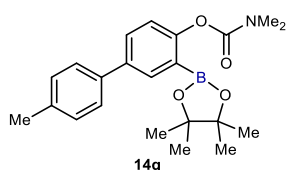

**4'-methyl-3-(4,4,5,5-tetramethyl-1,3,2-dioxaborolan-2-yl)-[1,1'-biphenyl]-4-yl**

**dimethylcarbamate (14q)** was prepared as shown in **Scheme S6**, obtained as a white solid, 65% yield (124.1mg, 0.5 mmol scale).

**<sup>1</sup>H NMR** (600 MHz, Chloroform-d)  $\delta$  7.89 (d,  $J$  = 2.5 Hz, 1H), 7.55 (dd,  $J$  = 8.3, 2.5 Hz, 1H), 7.44 – 7.40 (m, 2H), 7.15 (d,  $J$  = 7.9 Hz, 2H), 7.06 (d,  $J$  = 8.3 Hz, 1H), 3.08 (s, 3H), 2.94 (s, 3H), 2.31 (s, 3H), 1.25 (s, 12H)

**<sup>13</sup>C NMR** (101 MHz, Chloroform-d)  $\delta$  155.7, 155.6, 137.8, 137.7, 136.7, 134.7, 130.7, 129.3, 127.0, 122.4, 83.5, 36.7, 36.5, 24.9 (the C-B did not show)

**HRMS** calculated for C<sub>22</sub>H<sub>28</sub>BNNaO<sub>4</sub><sup>+</sup> [M+Na]<sup>+</sup>: 404.2004; found 404.2002

**IR** (KBr, cm<sup>-1</sup>): 3453, 2976, 2923, 1708, 1611, 1388, 1169, 1072, 808, 674

**M.p.**: 104.3-109.6°C

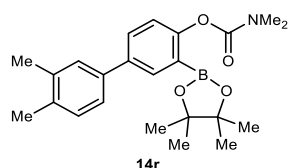

### **3',4'-dimethyl-3-(4,4,5,5-tetramethyl-1,3,2-dioxaborolan-2-yl)-[1,1'-biphenyl]-4-yl**

**dimethylcarbamate (14r)** was prepared as shown in **Scheme S6**, obtained as a yellow solid, 81% yield (158.6mg, 0.5 mmol scale).

**<sup>1</sup>H NMR** (400 MHz, Chloroform-d)  $\delta$  7.95 (d,  $J$  = 2.4 Hz, 1H), 7.63 (d,  $J$  = 8.4 Hz, 1H), 7.37 (s, 1H), 7.33 (d,  $J$  = 7.8 Hz, 1H), 7.18 (d,  $J$  = 7.8 Hz, 1H), 7.12 (d,  $J$  = 8.3 Hz, 1H), 3.16 (s, 3H), 3.02 (s, 3H), 2.32 (s, 3H), 2.29 (s, 3H), 1.32 (s, 12H)

**<sup>13</sup>C NMR** (101 MHz, Chloroform-d)  $\delta$  155.8, 155.7, 138.3, 138.1, 136.9, 135.6, 134.8, 130.9, 130.1, 128.6, 124.7, 122.5, 83.7, 36.8, 25.1, 20.0, 19.5 (the C-B did not show)

**HRMS** calculated for C<sub>23</sub>H<sub>30</sub>BNNaO<sub>4</sub><sup>+</sup> [M+Na]<sup>+</sup>: 418.2160; found 418.2157

**IR** (KBr, cm<sup>-1</sup>): 2973, 2929, 1719, 1332, 1169, 1069, 963

**M.p.**: 71.9-76.4°C

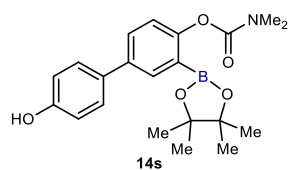

### **4'-hydroxy-3-(4,4,5,5-tetramethyl-1,3,2-dioxaborolan-2-yl)-[1,1'-biphenyl]-4-yl**

**dimethylcarbamate (14s)** was prepared as shown in **Scheme S6**, obtained as a colorless liquid, 38% yield (51.6mg, 0.36 mmol scale).

**<sup>1</sup>H NMR** (600 MHz, Chloroform-d)  $\delta$  7.71 (t,  $J$  = 1.8 Hz, 1H), 7.37 (d,  $J$  = 8.4 Hz, 1H), 7.13 – 7.07 (m, 2H), 6.97 (dd,  $J$  = 8.3 Hz, 1H), 6.62 (s, 1H), 6.42 (dd,  $J$  = 8.4 Hz, 2H), 3.10 (s, 3H), 2.98 (s, 3H), 1.26 (d,  $J$  = 1.5 Hz, 12H)

**<sup>13</sup>C NMR** (151 MHz, Chloroform-d)  $\delta$  156.7, 156.1, 155.2, 138.3, 134.7, 131.6, 130.6, 128.2, 122.5, 115.5, 83.7, 77.4, 36.9, 25.1

**HRMS** calculated for C<sub>21</sub>H<sub>26</sub>BNNaO<sub>5</sub><sup>+</sup> [M+Na]<sup>+</sup>: 406.1796; found 406.1791

**IR** (KBr, cm<sup>-1</sup>): 3260, 2976, 1693, 1614, 1397, 1350, 849, 673

**M.p.**: 198.4-201.8°C

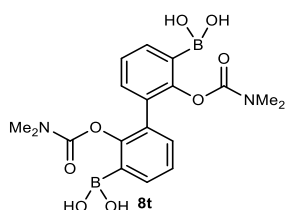

**(2,2'-bis((dimethylcarbamoyl)oxy)-[1,1'-biphenyl]-3,3'-diyl)diboronic acid (8t)** was prepared as shown in **Scheme S6**, obtained as a white solid, 77% yield (159.6mg, 0.5 mmol scale)

**<sup>1</sup>H NMR** (600 MHz, DMSO-d<sub>6</sub>) δ 7.84 (s, 4H), 7.55 (t, *J* = 4.6 Hz, 2H), 7.20 (d, *J* = 4.5 Hz, 4H), 2.70 (s, 12H)

**<sup>13</sup>C NMR** (101 MHz, DMSO-d<sub>6</sub>) δ 154.7, 151.9, 133.9, 131.9, 130.6, 123.8, 36.2, 35.8

**HRMS** calculated for C<sub>22</sub>H<sub>30</sub>B<sub>2</sub>N<sub>2</sub>NaO<sub>8</sub><sup>+</sup> ([M+4MeOH-4H<sub>2</sub>O+Na]<sup>+</sup>): 494.2117; found 494.2116 (The HRMS analysis was performed in MeOH/H<sub>2</sub>O, and the boronic acid motif transferred into corresponding dimethylborate in situ, and the HRMS was actually obtained as the dimethylborate.)

**IR** (KBr, cm<sup>-1</sup>): 3442, 2929, 1710, 1658, 1274, 1201, 750

**M.p.:** 286-297.5°C

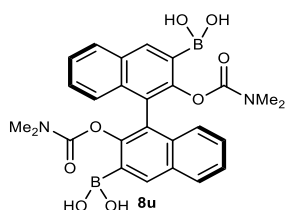

**(R)-(2,2'-bis((dimethylcarbamoyl)oxy)-[1,1'-binaphthalene]-3,3'-diyl)diboronic acid (8u)** was prepared as shown in **Scheme S6**, obtained as a yellow solid, quantitative yield (260.6mg, 0.5 mmol scale).

**<sup>1</sup>H NMR** (600 MHz, DMSO-d<sub>6</sub>) δ 8.24 (s, 2H), 7.99 (d, *J* = 8.2 Hz, 2H), 7.97 (s, 4H), 7.44 (t, *J* = 7.4 Hz, 2H), 7.27 (t, *J* = 8.0 Hz, 2H), 7.01 (d, *J* = 8.5 Hz, 2H), 2.54 (s, 6H), 2.25 (s, 6H)

**<sup>13</sup>C NMR** (151 MHz, DMSO-d<sub>6</sub>) δ 154.8, 150.2, 135.2, 133.6, 130.3, 130.1, 128.3, 126.6, 125.5, 125.1, 123.0, 36.0, 35.5

**HRMS** calculated for C<sub>30</sub>H<sub>34</sub>B<sub>2</sub>N<sub>2</sub>NaO<sub>8</sub><sup>+</sup> ([M+4MeOH-4H<sub>2</sub>O+Na]<sup>+</sup>): 594.2430; found 594.2437 (The HRMS analysis was performed in MeOH/H<sub>2</sub>O, and the boronic acid motif transferred into corresponding dimethylborate in situ, and the HRMS was actually obtained as the dimethylborate.)

**IR** (KBr, cm<sup>-1</sup>): 3430, 2932, 1702, 1453, 1172, 750

**M.p.:** 295.9-299.4°C

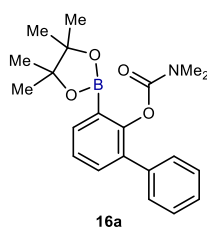

**3-(4,4,5,5-tetramethyl-1,3,2-dioxaborolan-2-yl)-[1,1'-biphenyl]-2-yl dimethylcarbamate (16a)**

was prepared as shown in **Scheme S6**, obtained as a white solid, 74% yield (136.1mg, 0.5 mmol scale).

**<sup>1</sup>H NMR** (600 MHz, Chloroform-d)  $\delta$  7.75 (d,  $J$  = 7.4 Hz, 1H), 7.46 – 7.39 (m, 3H), 7.39 – 7.33 (m, 2H), 7.32 – 7.27 (m, 1H), 7.24 (d,  $J$  = 4.4 Hz, 1H), 2.94 – 2.91 (m, 3H), 2.88 (s, 3H), 1.30 (s, 12H)

**<sup>13</sup>C NMR** (151 MHz, Chloroform-d)  $\delta$  155.5, 153.0, 138.4, 135.5, 135.0, 133.8, 129.4, 128.1, 127.1, 125.3, 83.7, 25.1

**HRMS** calculated for C<sub>21</sub>H<sub>26</sub>BNNaO<sub>4</sub><sup>+</sup> ([M+Na]<sup>+</sup>): 390.1847; found 390.1849

**IR** (KBr, cm<sup>-1</sup>): 2982, 2938, 1719, 1385, 1362, 1210, 1169, 764, 674

**M.p.:** 98.6-100.9°C

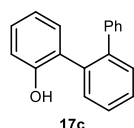

**[1,1':2',1''-terphenyl]-2-ol<sup>34</sup> (17c)** was prepared as shown in **Scheme S8**, obtained as a yellow liquid, quantitative yield (129.8mg, 0.5 mmol scale).

**<sup>1</sup>H NMR** (600 MHz, Chloroform-d)  $\delta$  7.54 – 7.45 (m, 3H), 7.42 (d,  $J$  = 7.3 Hz, 1H), 7.21 (s, 3H), 7.17 (dd,  $J$  = 13.9, 5.8 Hz, 3H), 7.04 (d,  $J$  = 7.5 Hz, 1H), 6.85 (t,  $J$  = 7.4 Hz, 1H), 6.80 (d,  $J$  = 8.1 Hz, 1H)

**<sup>13</sup>C NMR** (101 MHz, Chloroform-d)  $\delta$  152.5, 141.9, 140.6, 135.2, 131.5, 131.3, 130.9, 129.3, 129.1, 128.8, 128.2, 128.1, 127.9, 127.2, 120.6, 115.6

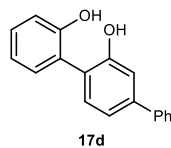

**[1,1':4',1''-terphenyl]-2,2'-diol<sup>35</sup> (17d)** was prepared as shown in **Scheme S9**, obtained as a brown liquid, 94% yield (123mg, 0.47 mmol scale)

**<sup>1</sup>H NMR** (600 MHz, Chloroform-d)  $\delta$  7.62 (d,  $J$  = 7.2 Hz, 2H), 7.46 (t,  $J$  = 7.2 Hz, 2H), 7.40 – 7.31 (m, 4H), 7.31 – 7.27 (m, 2H), 7.10 – 7.03 (m, 2H), 6.10 (s, 1H), 6.04 (s, 1H)

**<sup>13</sup>C NMR** (101 MHz, Chloroform-d)  $\delta$  153.2, 152.9, 143.1, 140.2, 131.6, 131.4, 130.0, 128.8, 127.7, 127.0, 123.5, 122.6, 121.7, 120.4, 116.7, 115.3

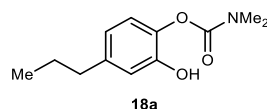

**2-hydroxy-4-propylphenyl dimethylcarbamate (18a)** was prepared as shown in **Scheme S9**, obtained as a yellow liquid, quantitative yield (122.7mg, 0.43 mmol scale).

**<sup>1</sup>H NMR** (600 MHz, Chloroform-d)  $\delta$  6.91 (d,  $J$  = 8.2 Hz, 1H), 6.84 (d,  $J$  = 2.1 Hz, 1H), 6.68 (d,  $J$  = 8.2 Hz, 1H), 3.13 (s, 3H), 3.03 (s, 3H), 2.54 – 2.48 (m, 2H), 1.64 – 1.56 (m, 3H), 0.92 (t,  $J$  = 7.3 Hz, 3H).

**<sup>13</sup>C NMR** (101 MHz, Chloroform-d)  $\delta$  147.2, 141.5, 126.5, 121.8, 121.6, 120.9, 119.1, 77.0, 76.7, 37.4, 36.9, 36.7, 24.3, 13.7

**HRMS** calculated for C<sub>12</sub>H<sub>17</sub>NNaO<sub>3</sub><sup>+</sup> [M+Na]<sup>+</sup> 246.1101; found 246.1100

**IR** (KBr, cm<sup>-1</sup>): 3395, 2964, 2929, 1705, 1514, 1394, 1187, 855





K-6-17.1.fid

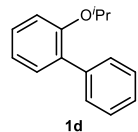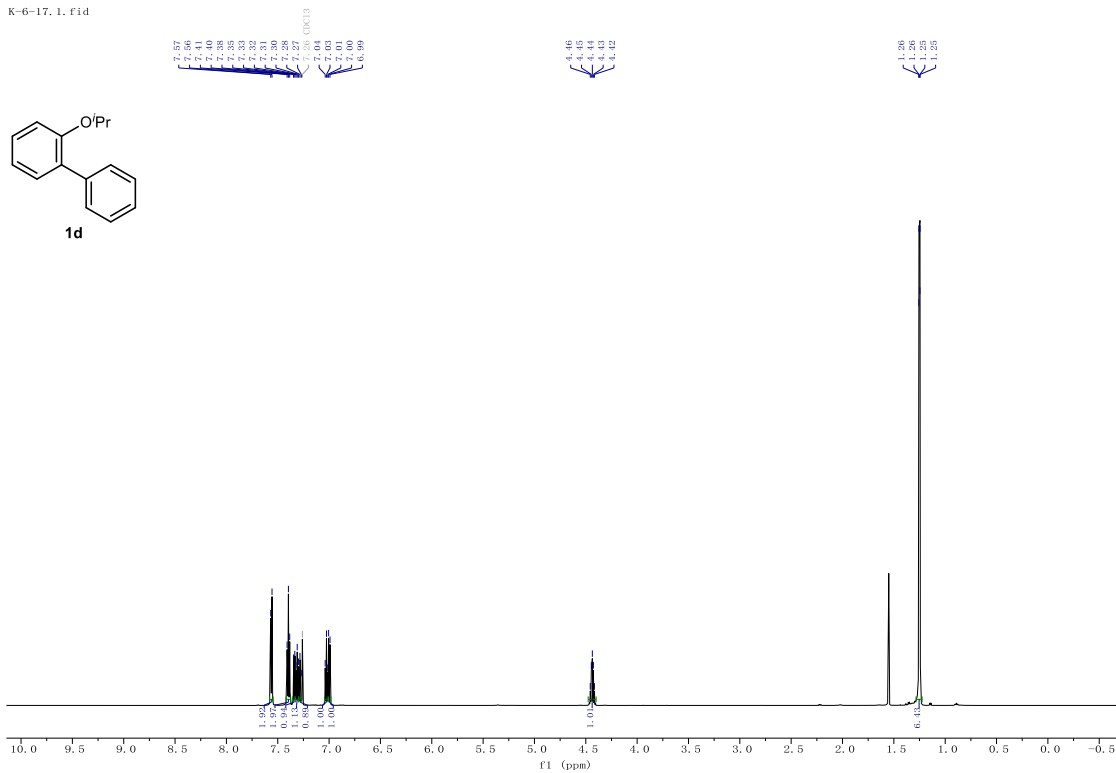

2023-1.14298.fid  
K-6-17

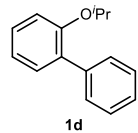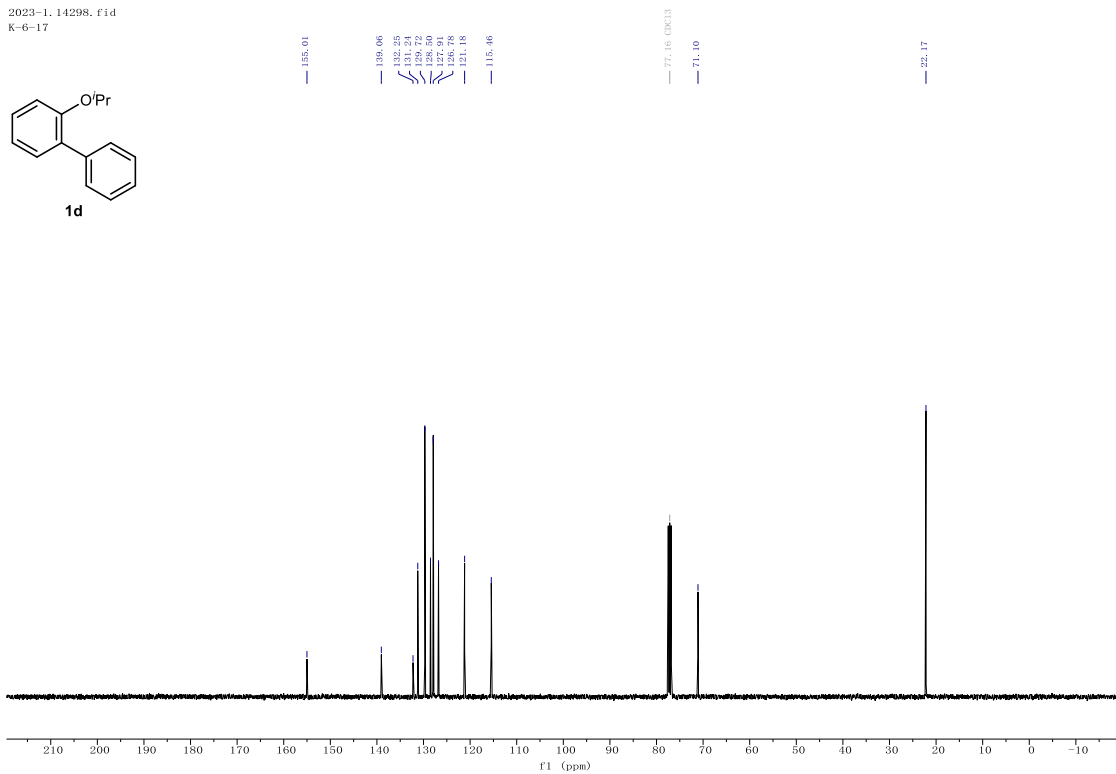







2023-1-18012.fid  
K-5-43P

7.57  
7.50  
7.44  
7.42  
7.40  
7.37  
7.34  
7.29  
6.86

6.23

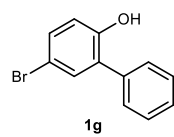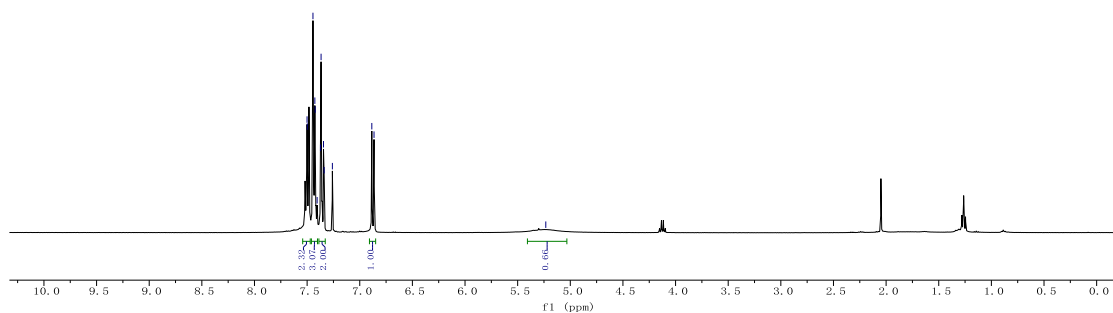

2023-1-18247.fid  
K-5-43

151.62

135.69  
132.62  
130.04  
129.44  
128.42

117.63  
112.74

77.00  
76.88

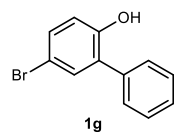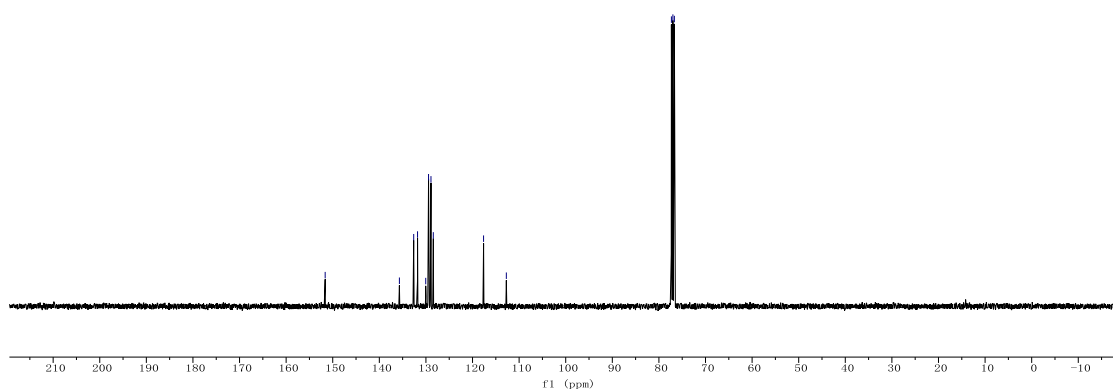





K-1-14.2.fid

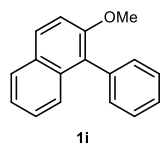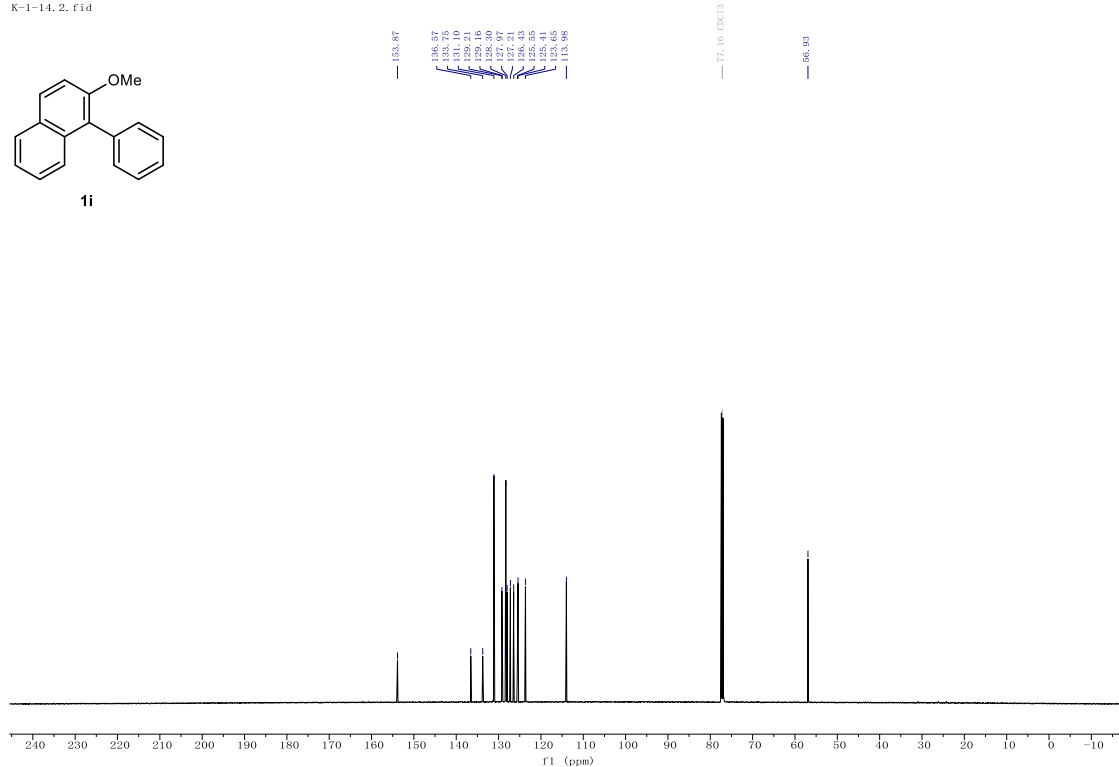

LJ-2-3.1.fid

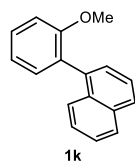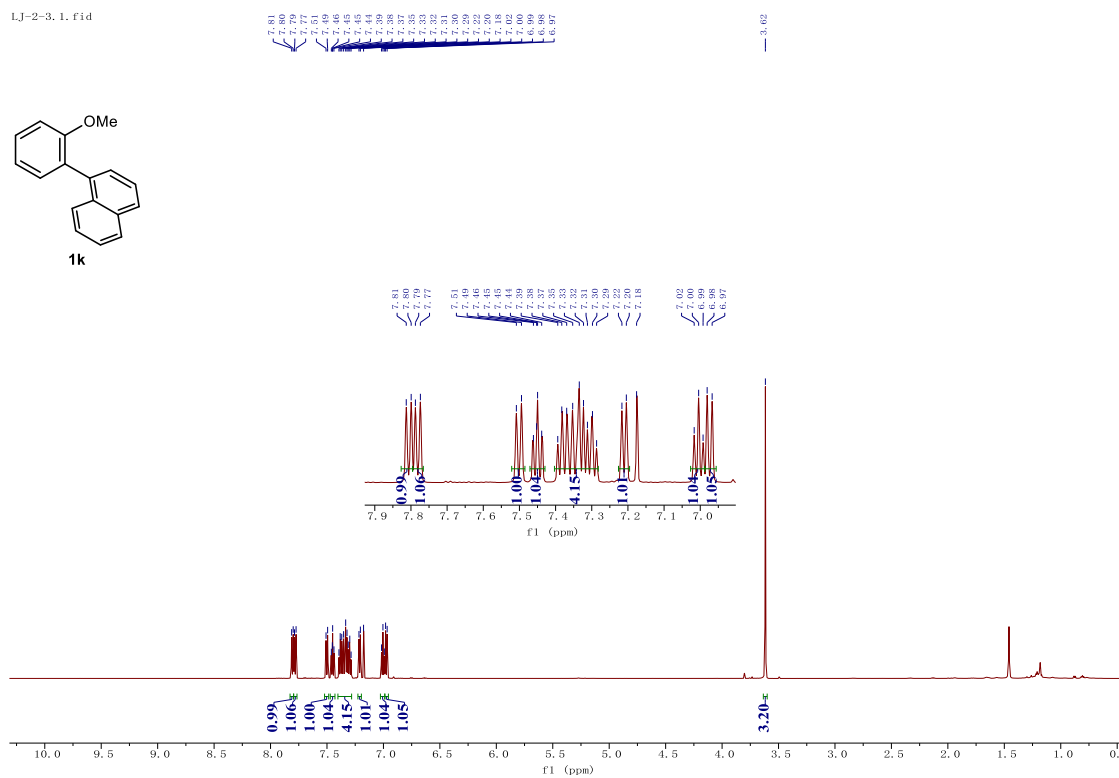

2023-1-14290.fid  
LJ-2-3

157.21  
156.93  
156.43  
132.12  
131.80  
131.50  
128.95  
128.09  
127.56  
126.40  
125.51  
125.32  
110.97  
77.00  
76.08  
55.50

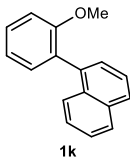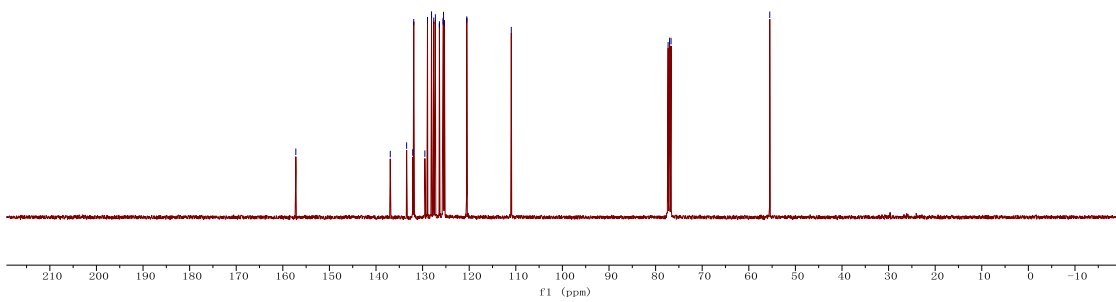

K-1-23.1.fid

7.35  
7.33  
7.31  
7.28  
7.18  
7.15  
7.13  
7.02  
6.99  
6.95  
3.75  
2.14

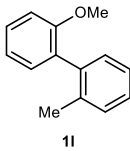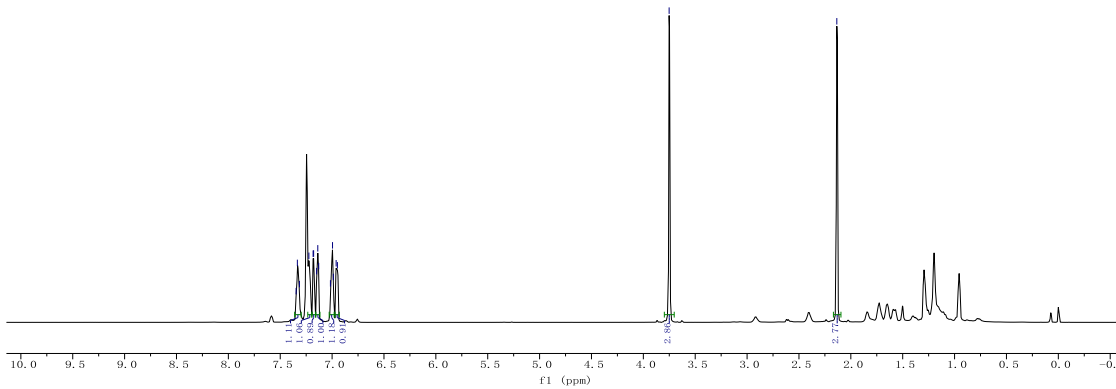

K-1-23.2.fid

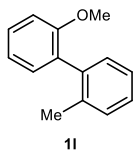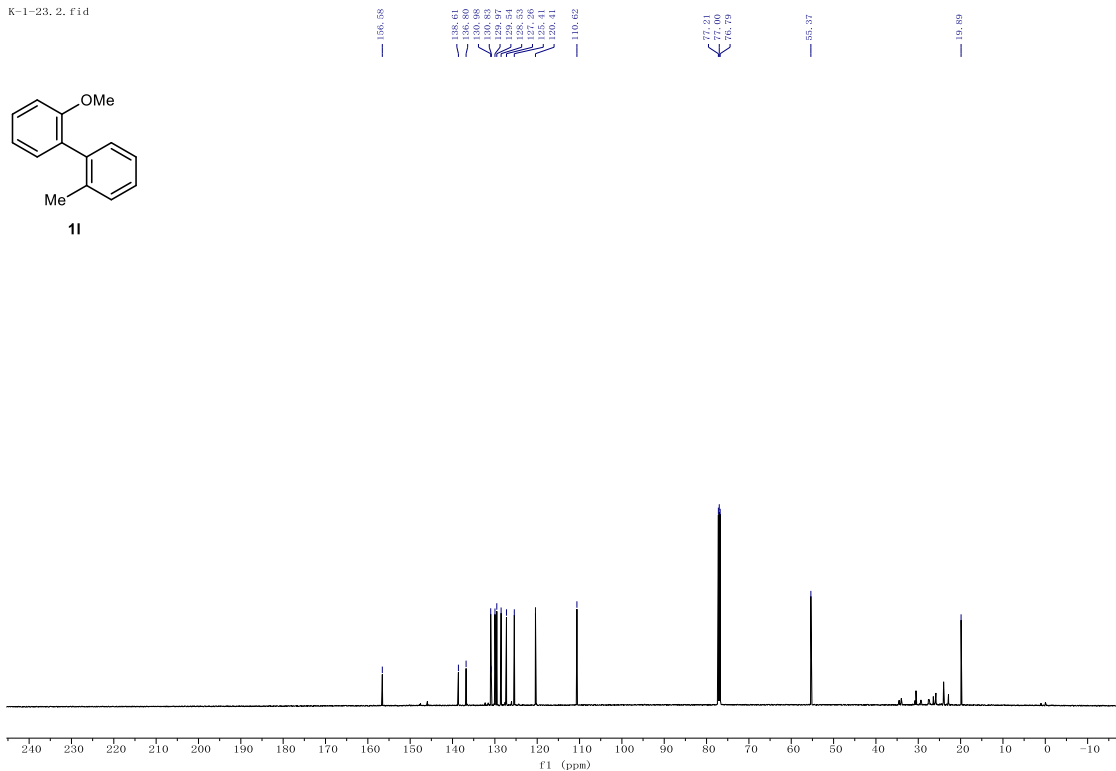

2023-1.15972.fid  
K-5-33

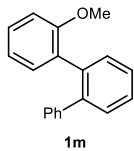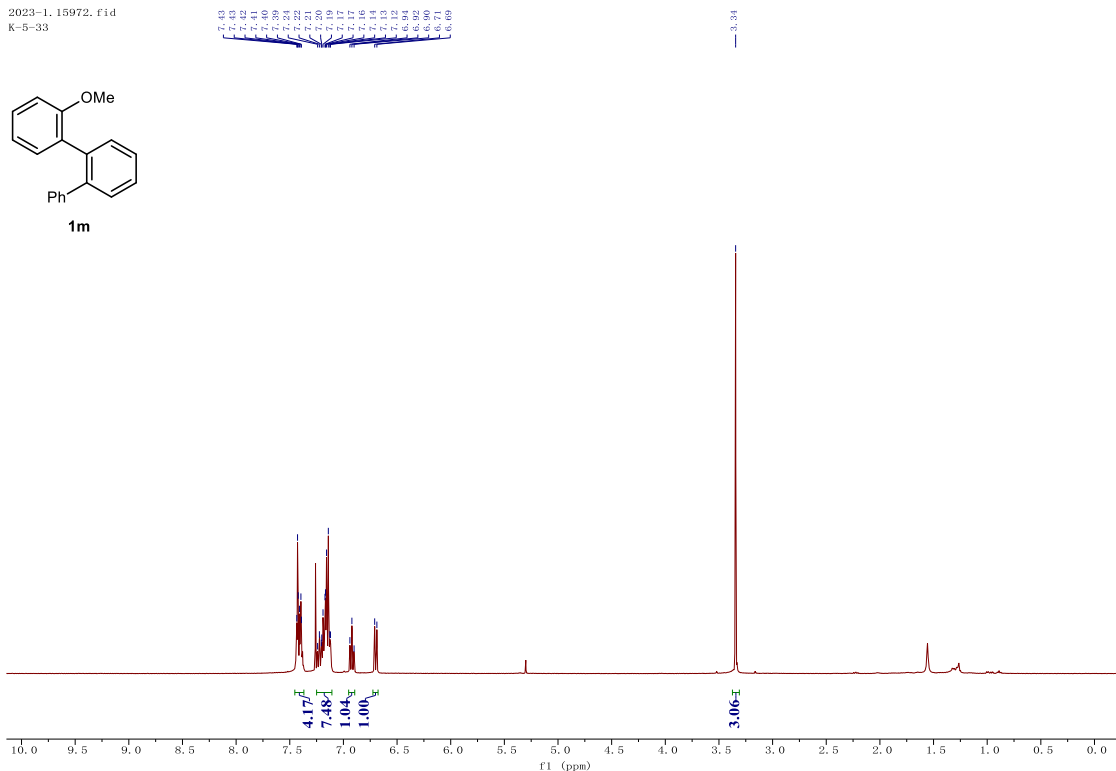

2023-1-16293.fid  
K-5-33

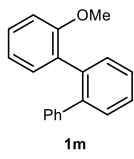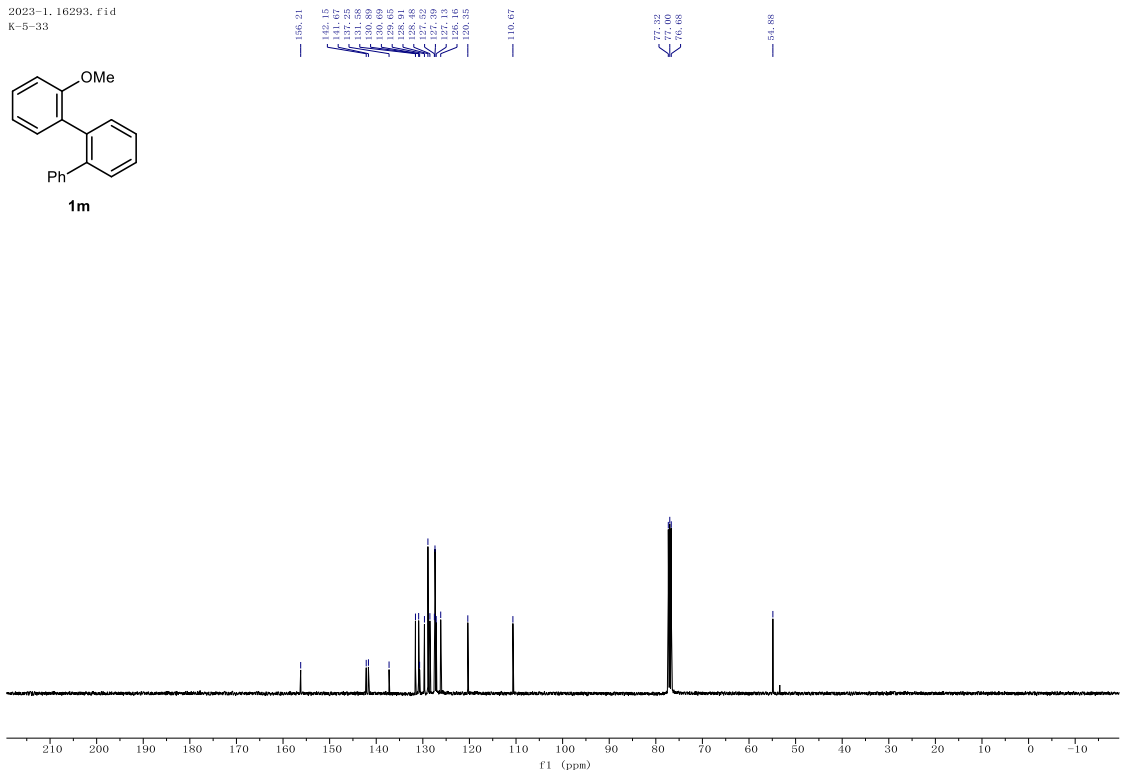

K-6-24.1.fid

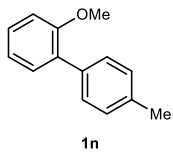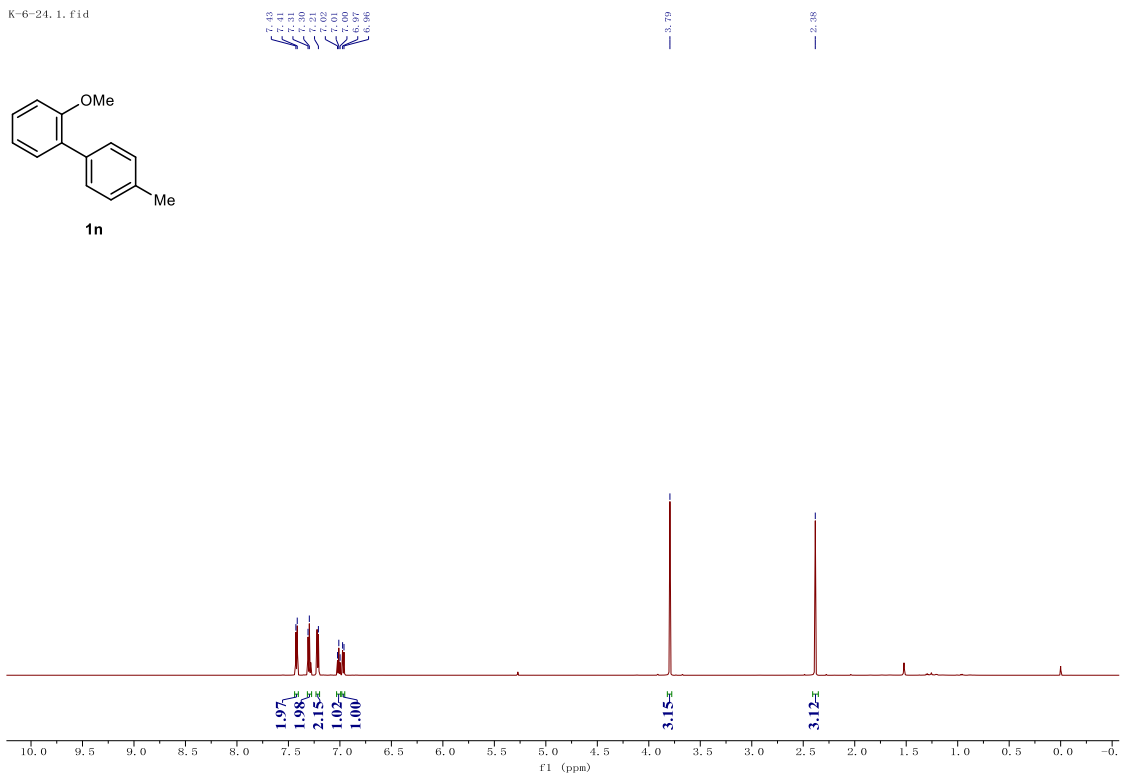





2023-1-14509.fid  
K-5-88

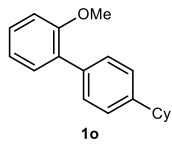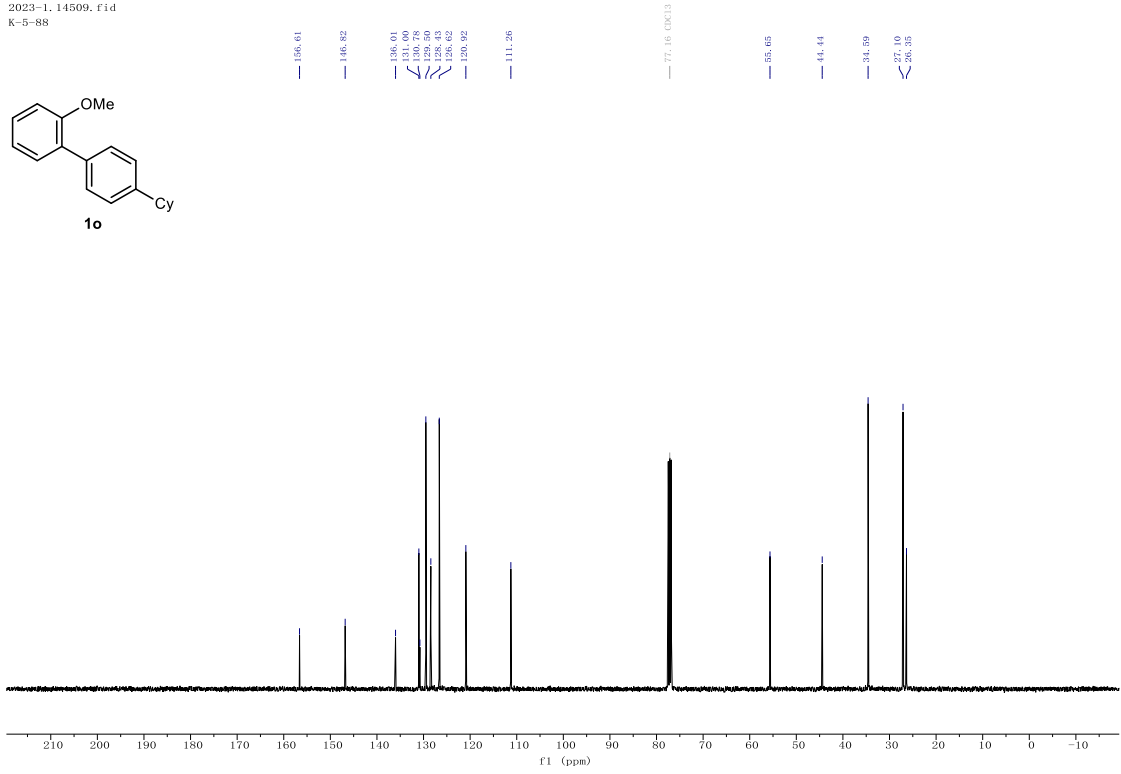

K-CL-3Ph.1.fid

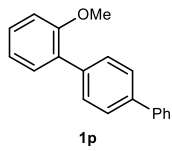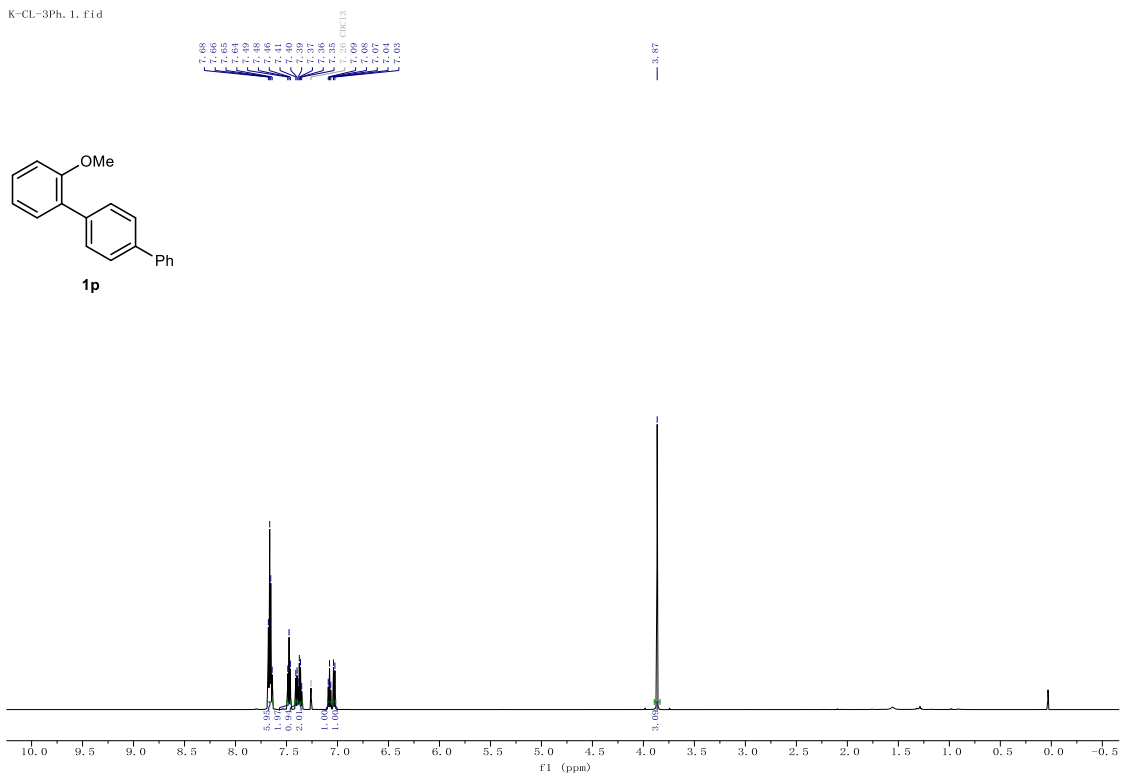

2023-1. 14514. fid  
CZL-3PH

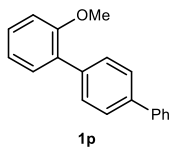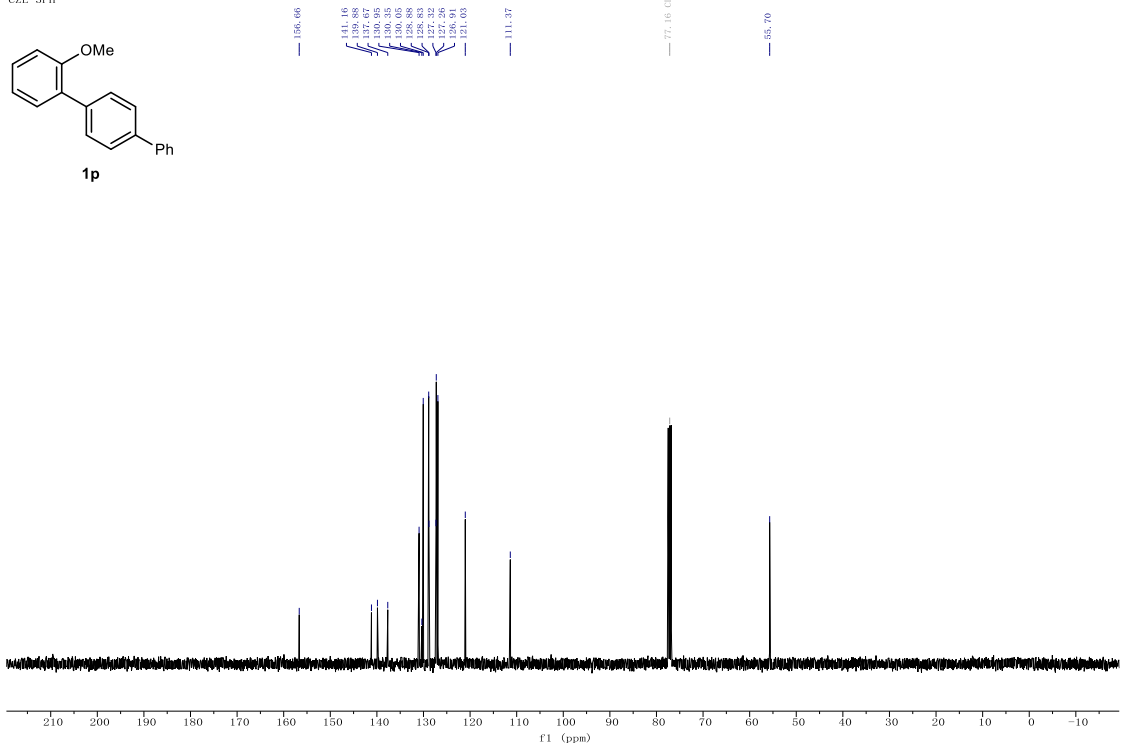

K-5-89. 1. fid

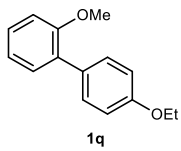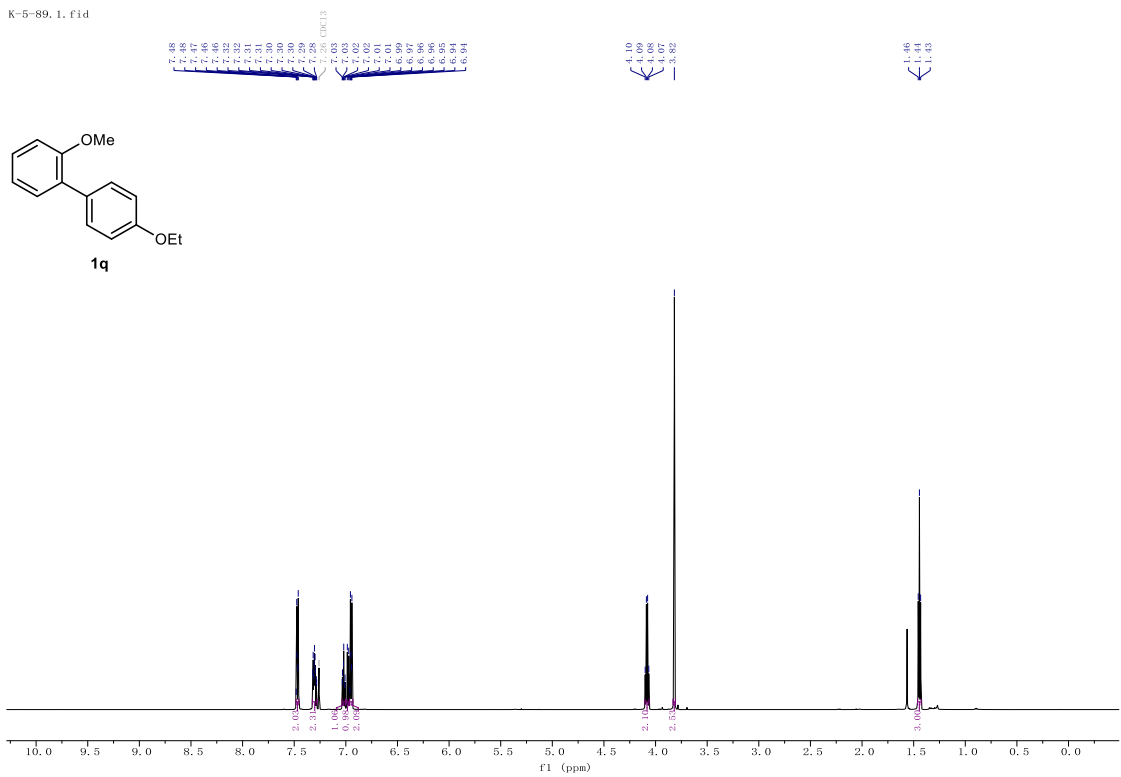

2023-1-15350.fid  
K-6-89

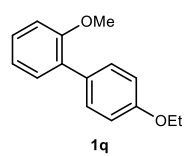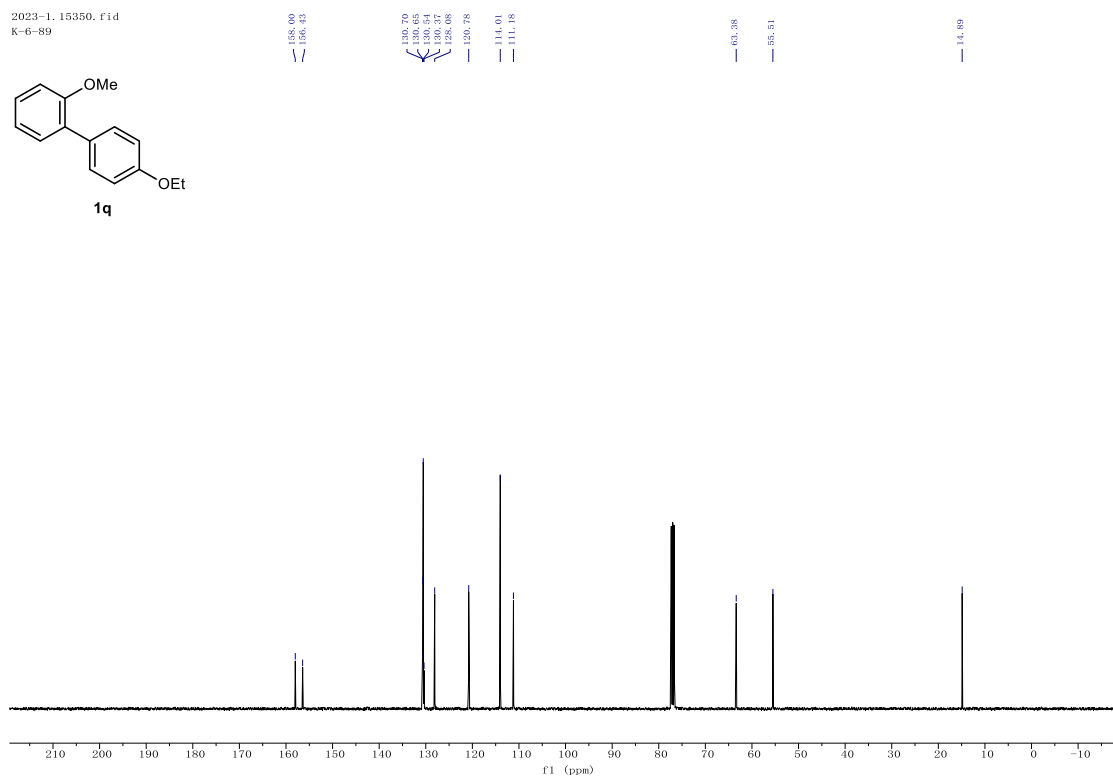

LJ-1-77.1.fid

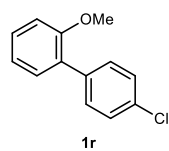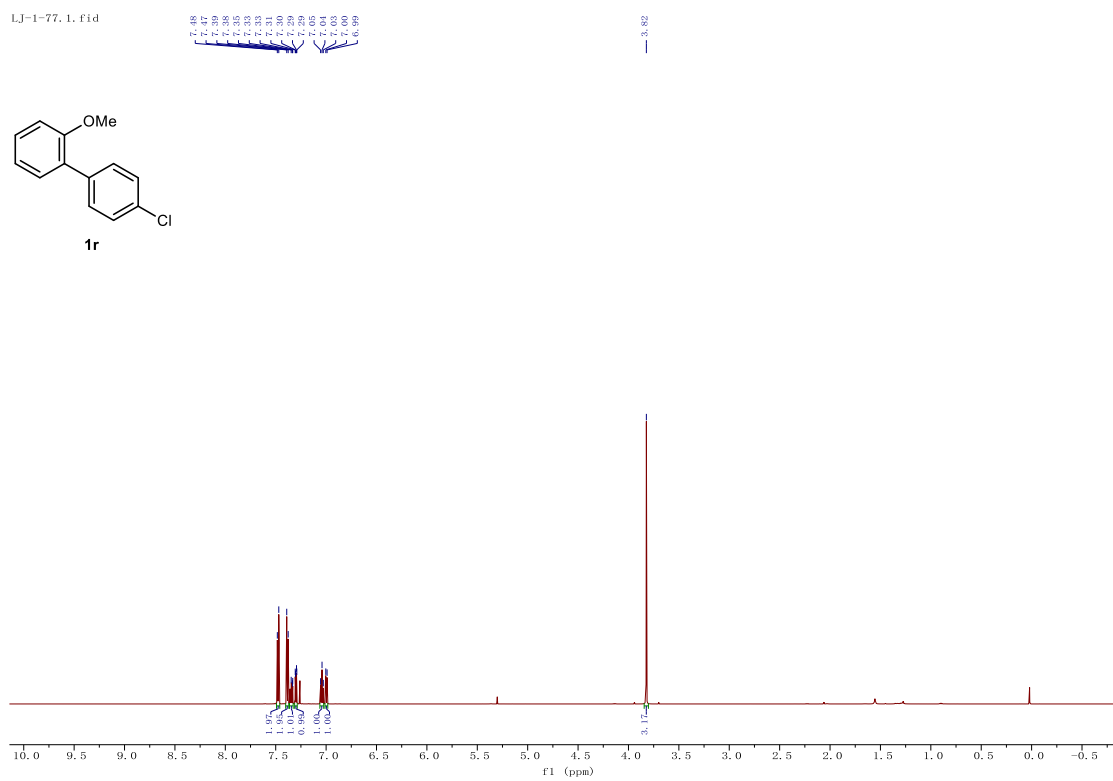

2023-1-17249.fid  
LJ 1-77

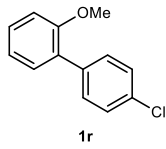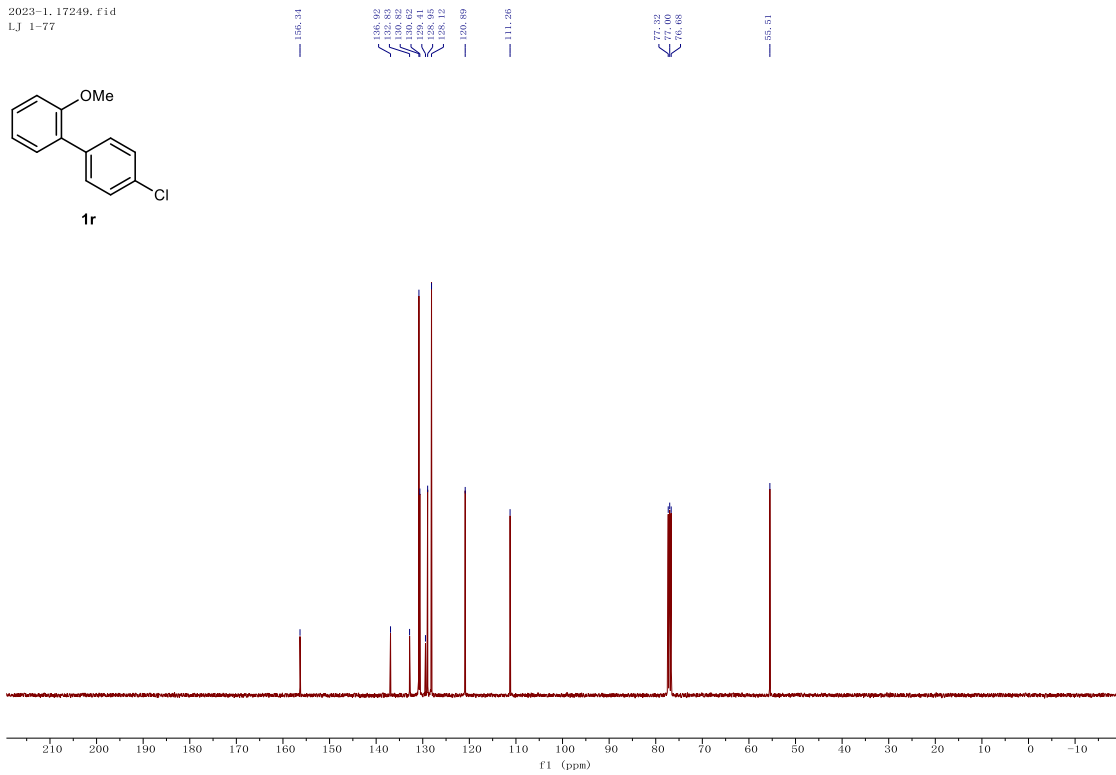

K-6-43.1.fid

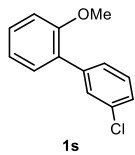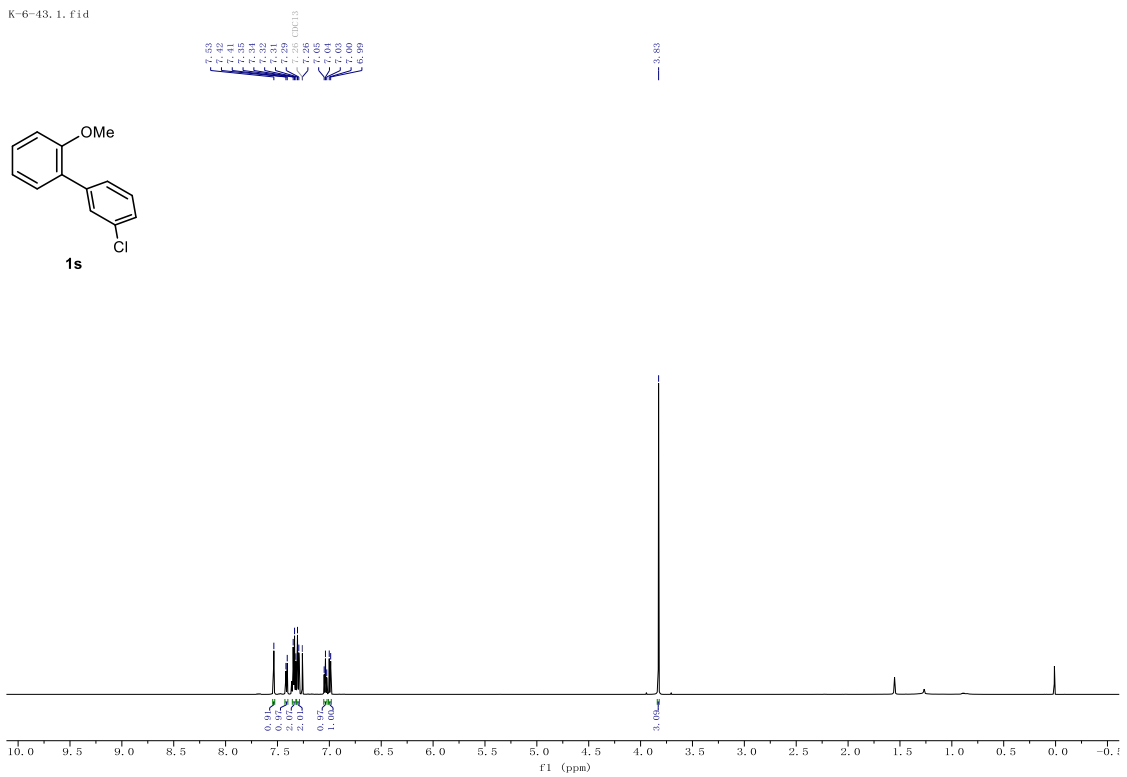

K-6-43.2.fid

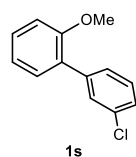

156.32  
146.29  
139.62  
138.65  
128.59  
128.59  
128.15  
127.69  
126.91  
126.86  
111.22  
77.00  
77.00  
76.79  
65.51

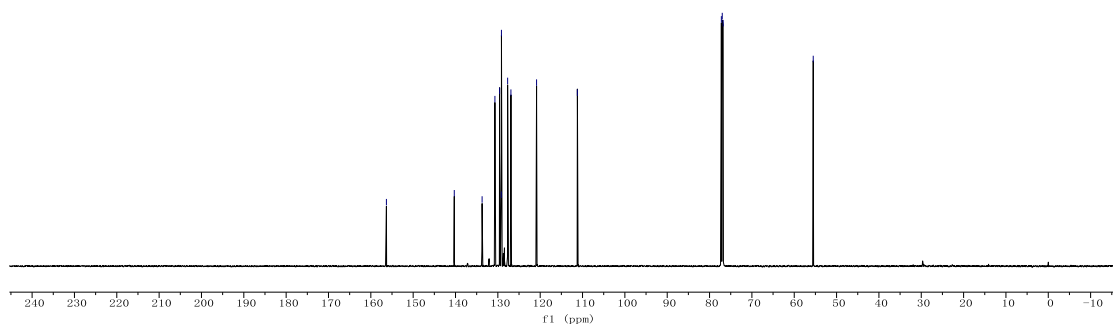

K-6-12.1.fid

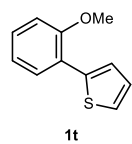

7.60  
7.65  
7.51  
7.51  
7.36  
7.31  
7.29  
7.12  
7.12  
7.04  
7.03  
7.02  
3.96

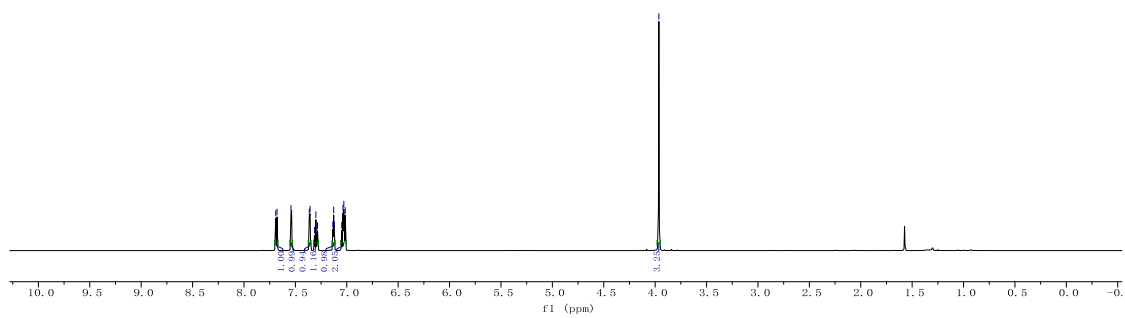

2023-1-14288.fid  
K-6-12

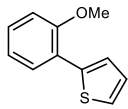

1t

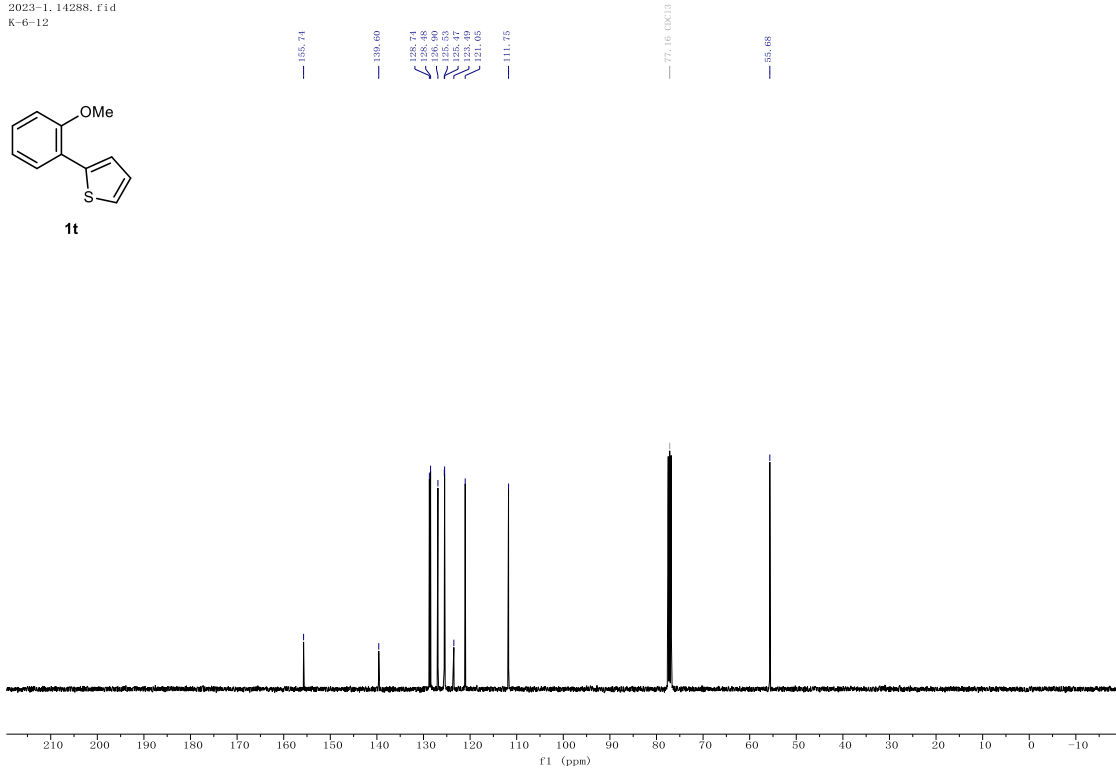

K-4-50.1.fid

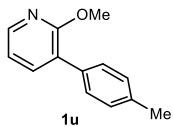

1u

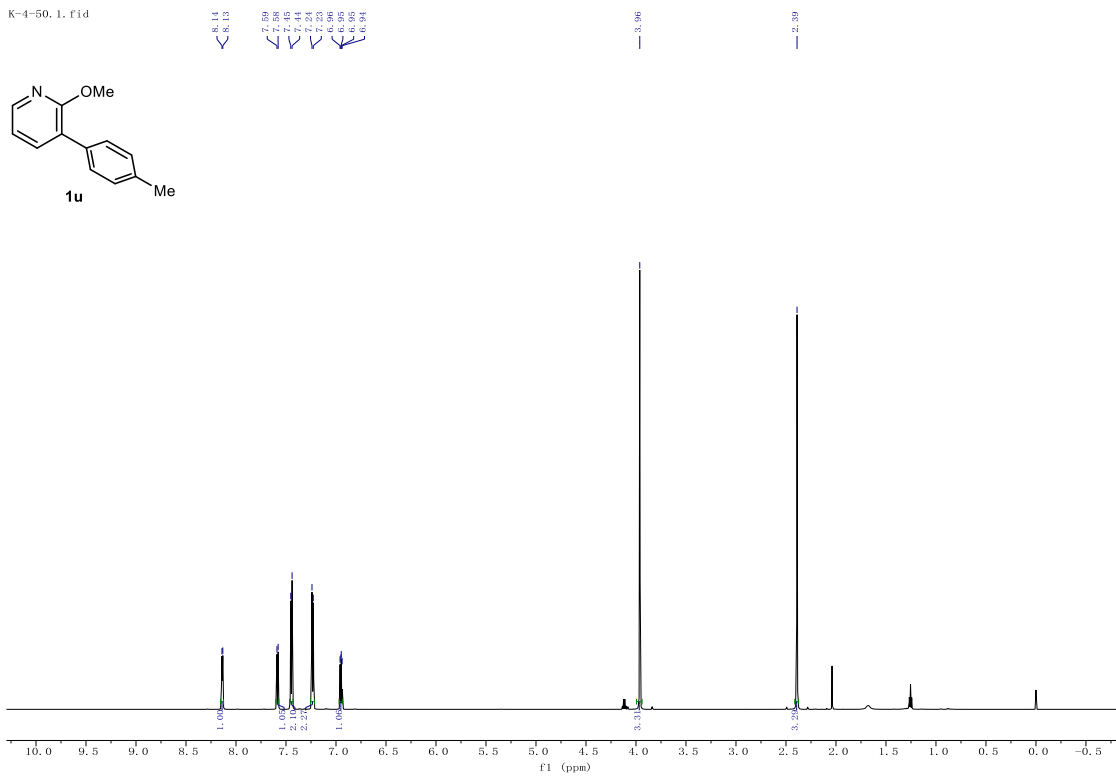

K-4-50.2.fid

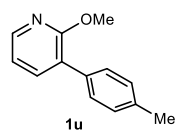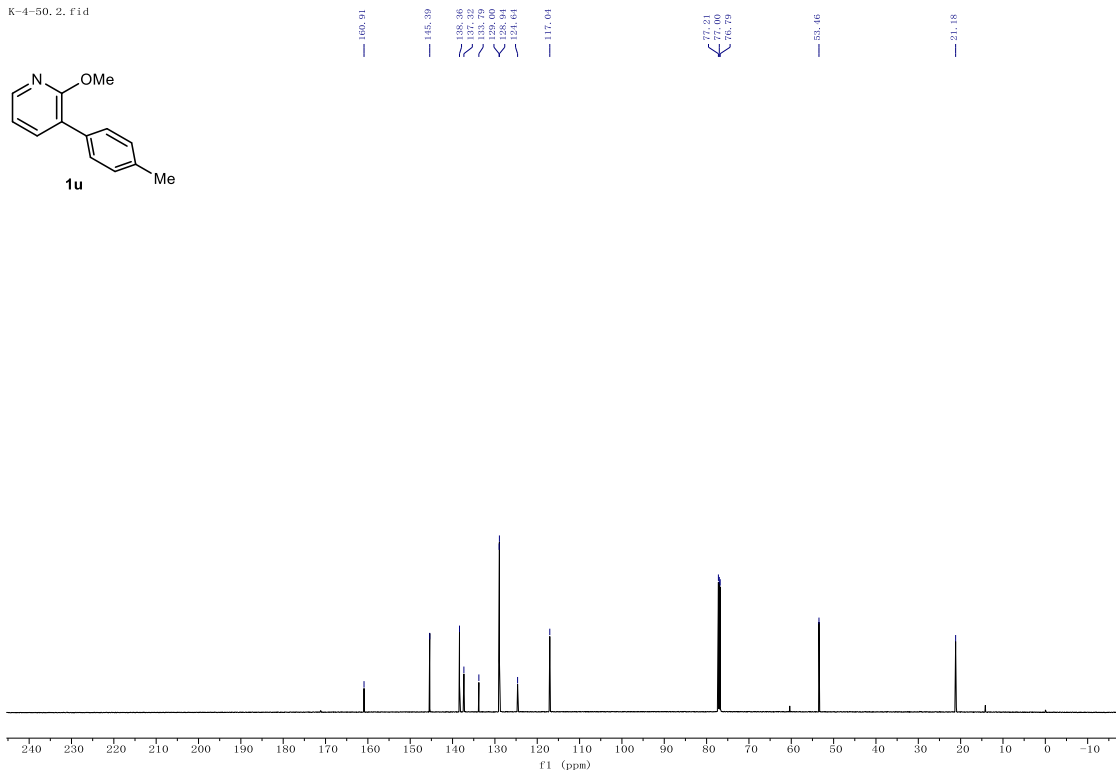

LJ-2-21-2.1.fid

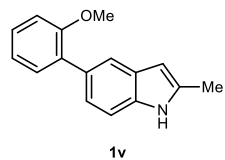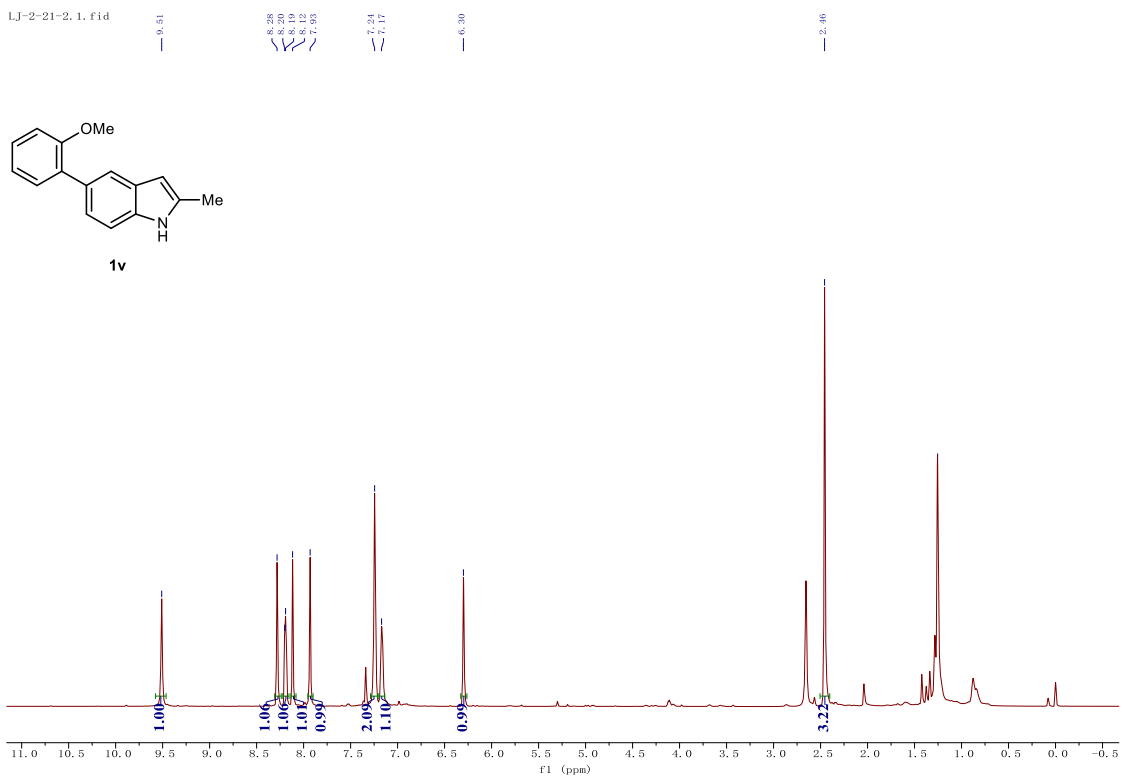



LJ-2-21-2.2.fid

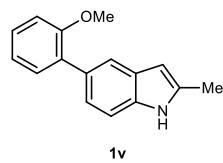

156.54  
138.99  
132.81  
132.81  
130.93  
124.25  
122.78  
119.68  
117.30  
111.70  
100.02

77.51  
77.00  
76.79

39.92  
39.64  
39.50  
39.38

29.38  
13.59

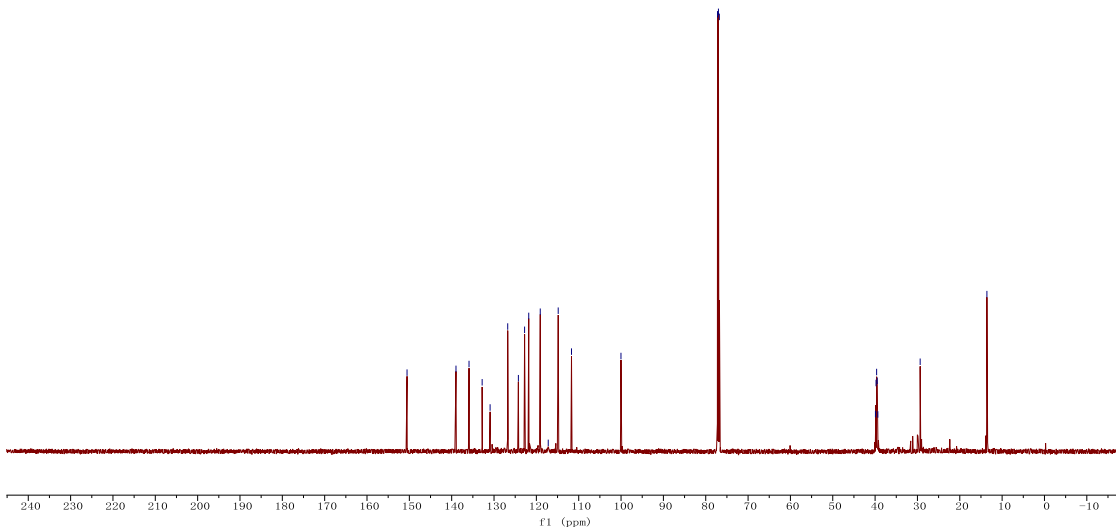

LJ-2-33.1.fid

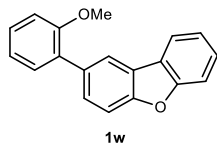

8.08  
7.97  
7.96  
7.63  
7.60  
7.41  
7.37  
7.35  
7.34  
7.07  
7.05  
7.02

3.84

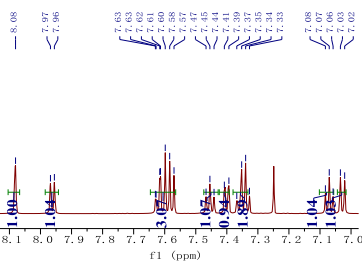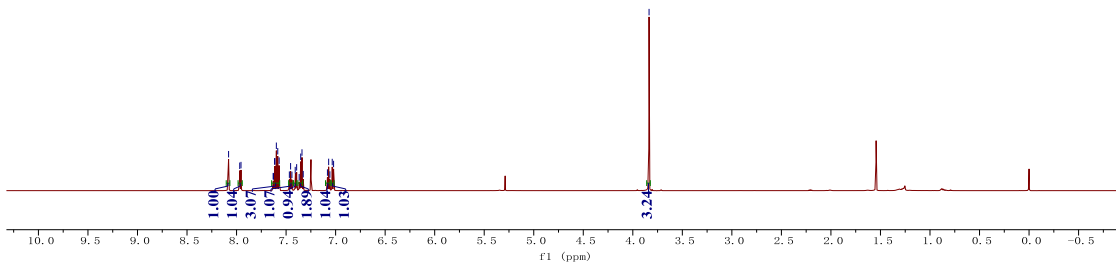



2023-1-14291.fid  
LJ-2-34

156.54  
139.74  
138.10  
135.57  
134.97  
133.09  
128.72  
128.51  
122.81  
121.57  
113.32

77.02  
77.00  
76.08

55.60

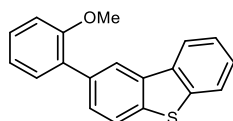

1x

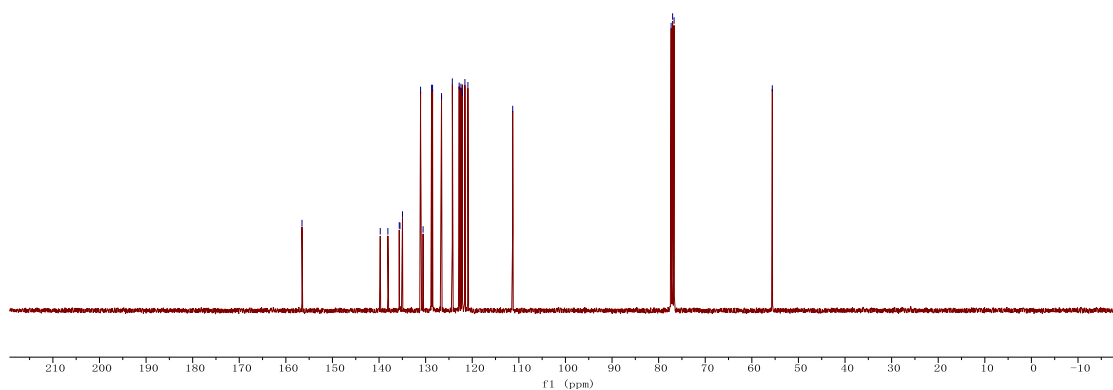

K-6-23.1.fid

7.72  
7.72  
7.45  
7.44  
7.35  
7.34  
7.06  
7.06  
6.91  
6.81  
6.82  
0.02

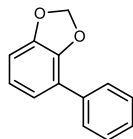

5a

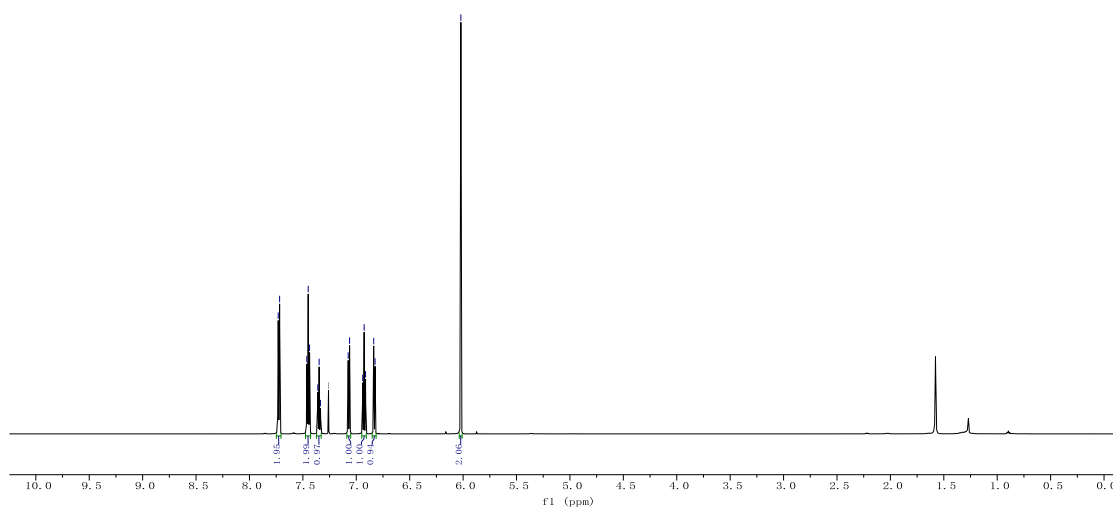

K-6-23. 2. fid

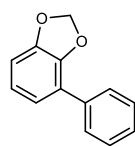

5a

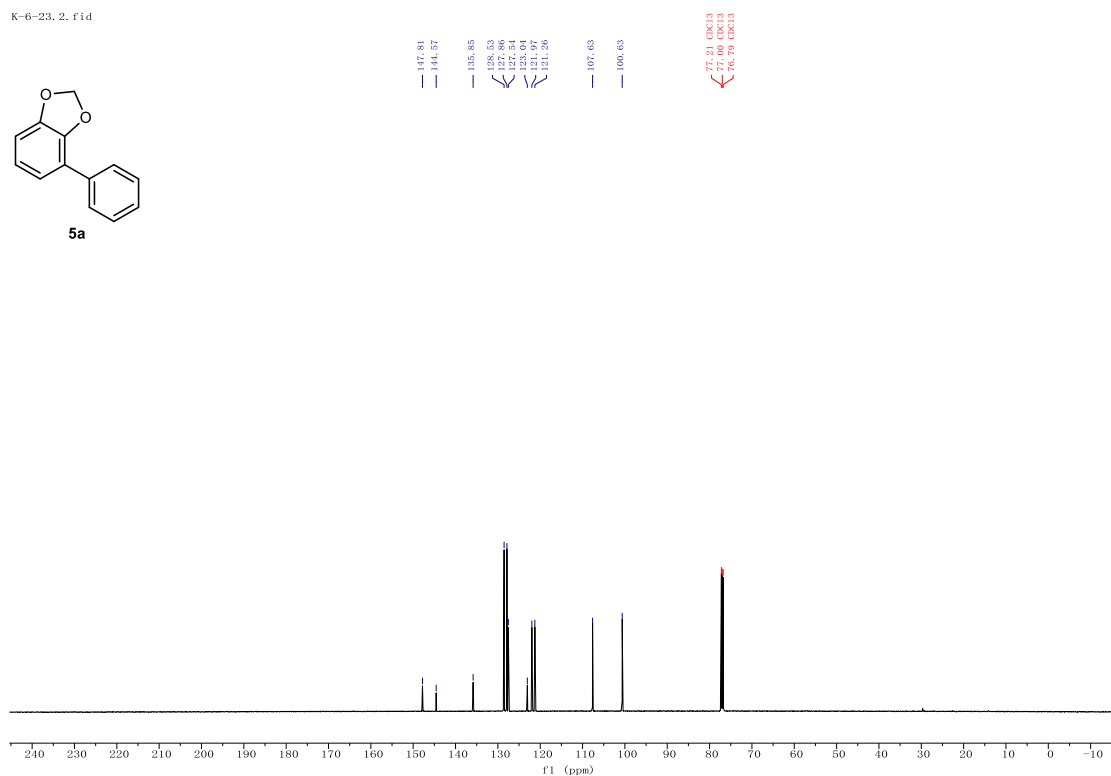

K-6-18. 1. fid

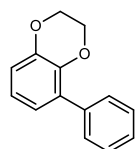

5b

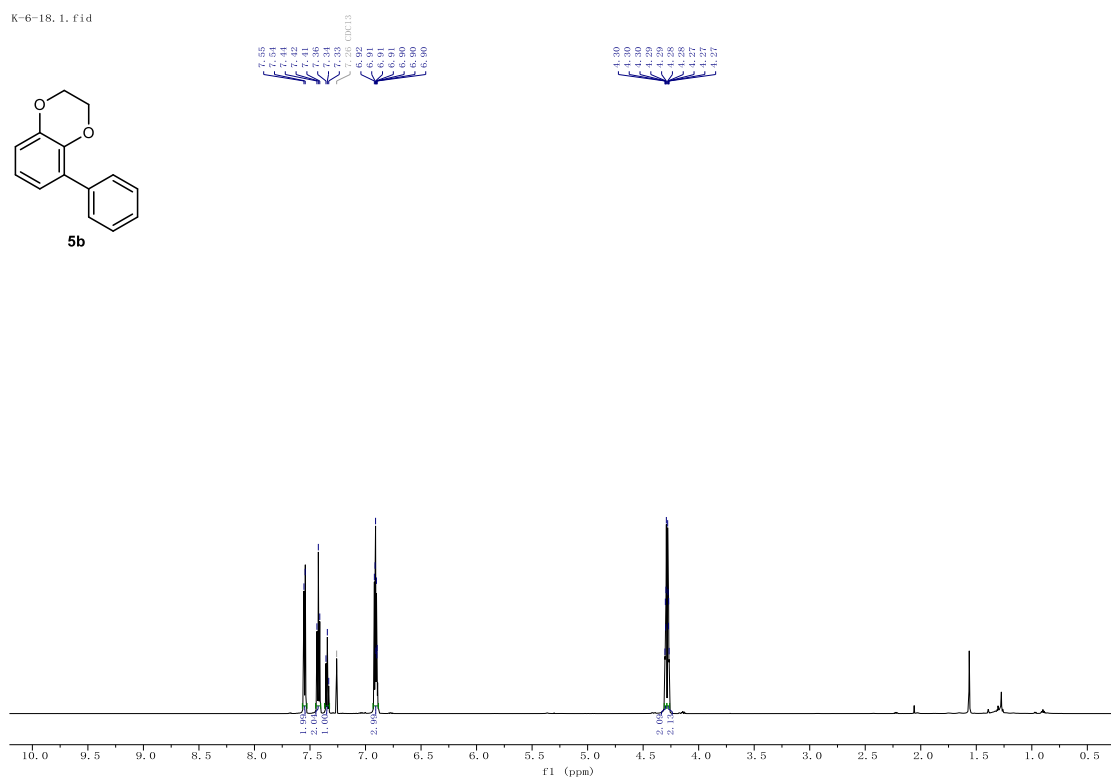

2023-1-14284.fid  
K-6-18

142.84  
137.63  
130.89  
129.40  
128.00  
127.82  
127.82  
126.96  
116.57  
77.02  
77.00  
76.08  
61.33  
61.11

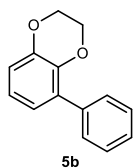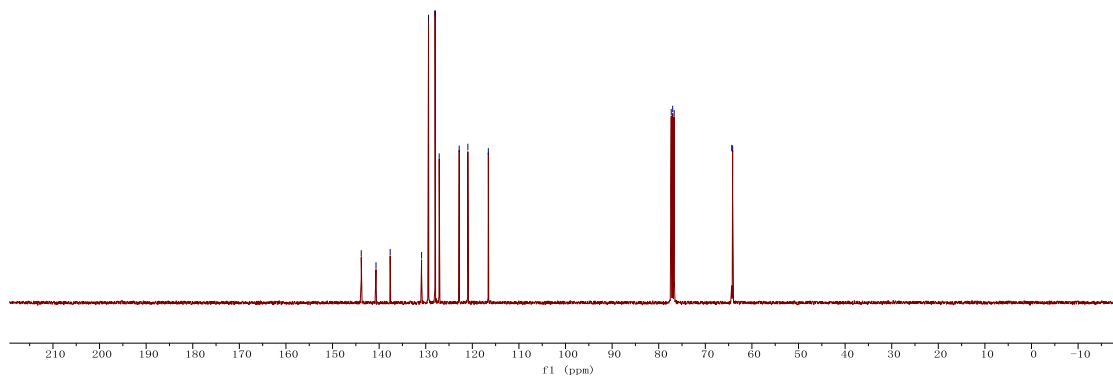

K-5-91.1.fid

7.71  
7.70  
7.45  
7.42  
7.32  
7.31  
7.30  
7.29 (CDCl<sub>3</sub>)  
7.20  
6.96  
6.91  
4.64  
4.61  
2.30  
2.27

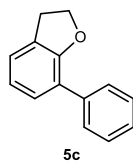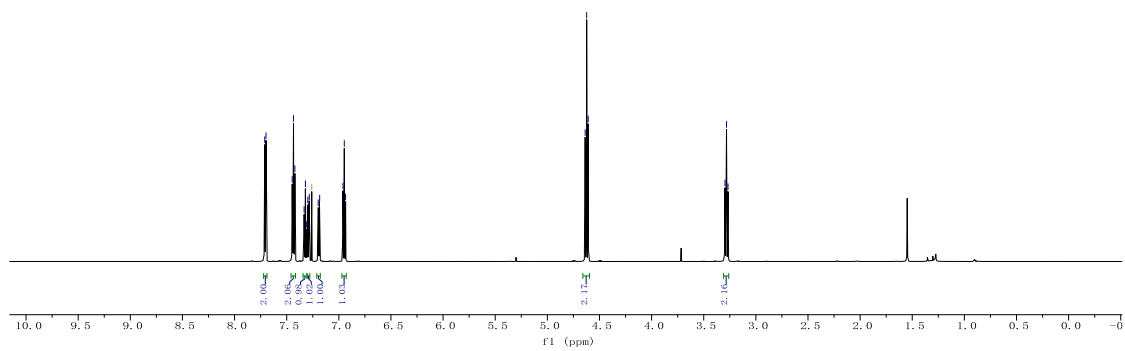

2023-1-14506.fid  
K-5-91

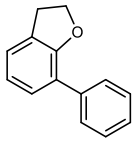

5c

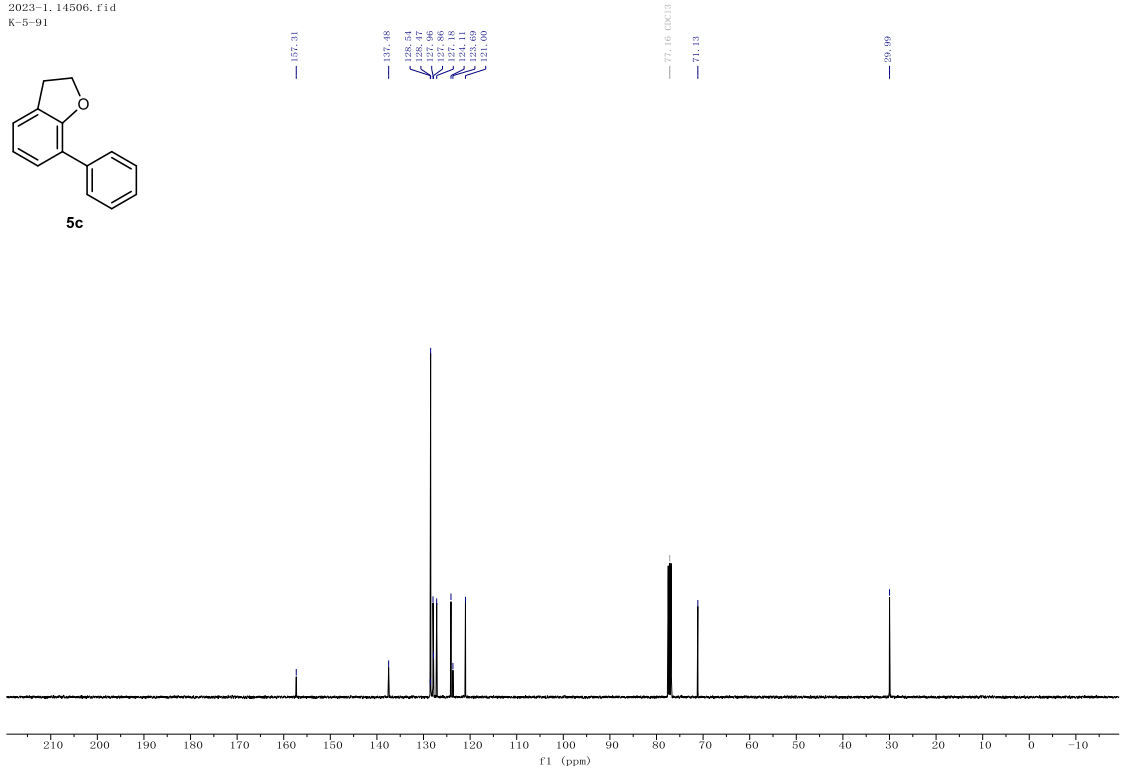

K-6-36.2.fid

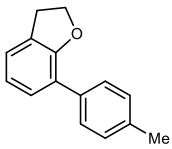

5d

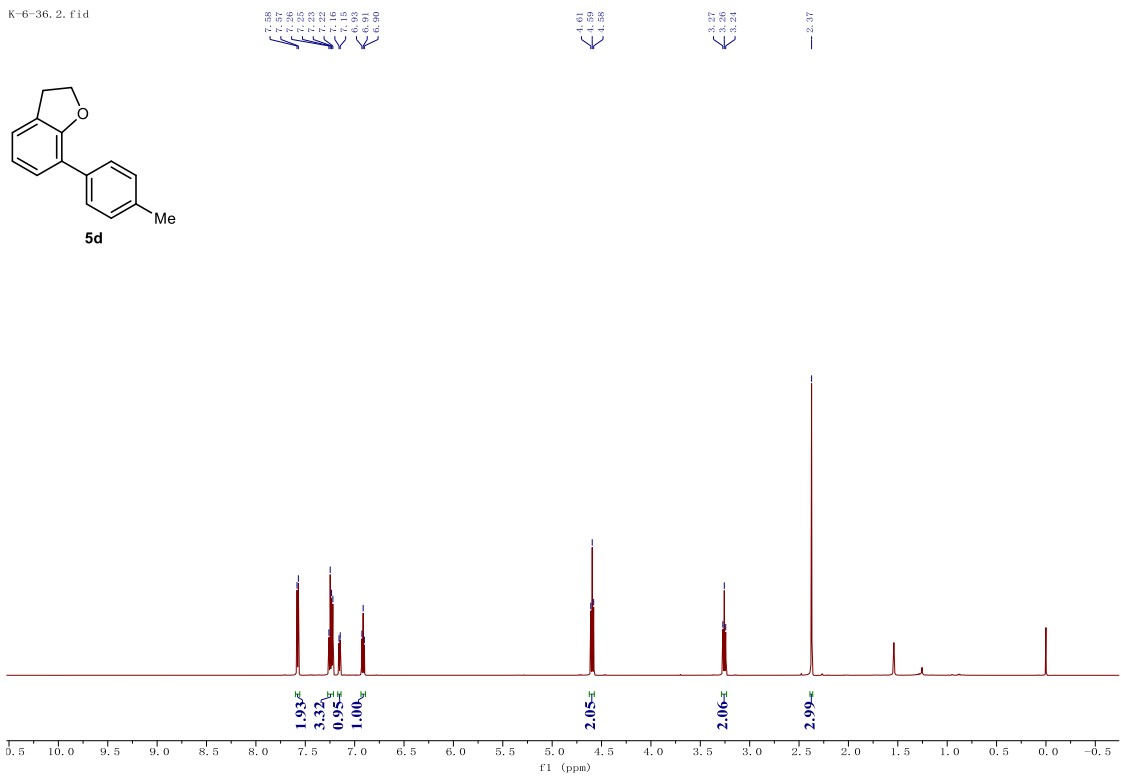

K-6-36.3.fid

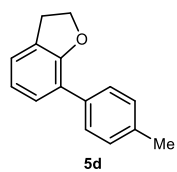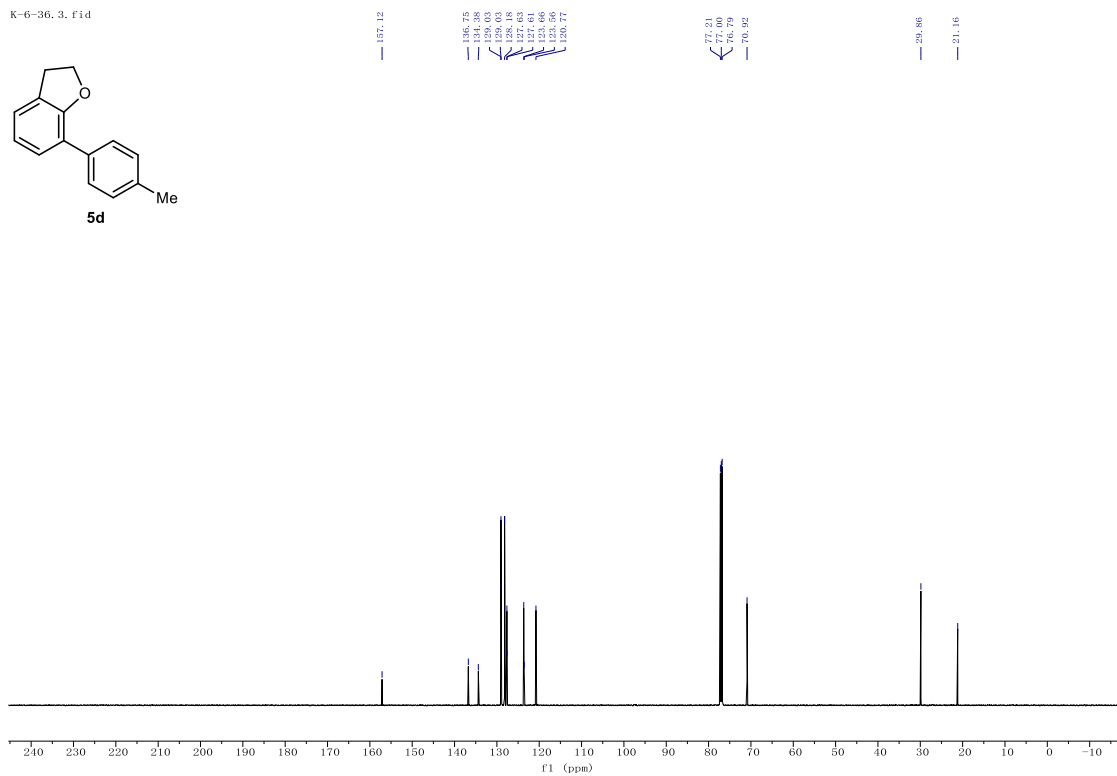

K-5-94.1.fid

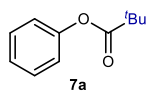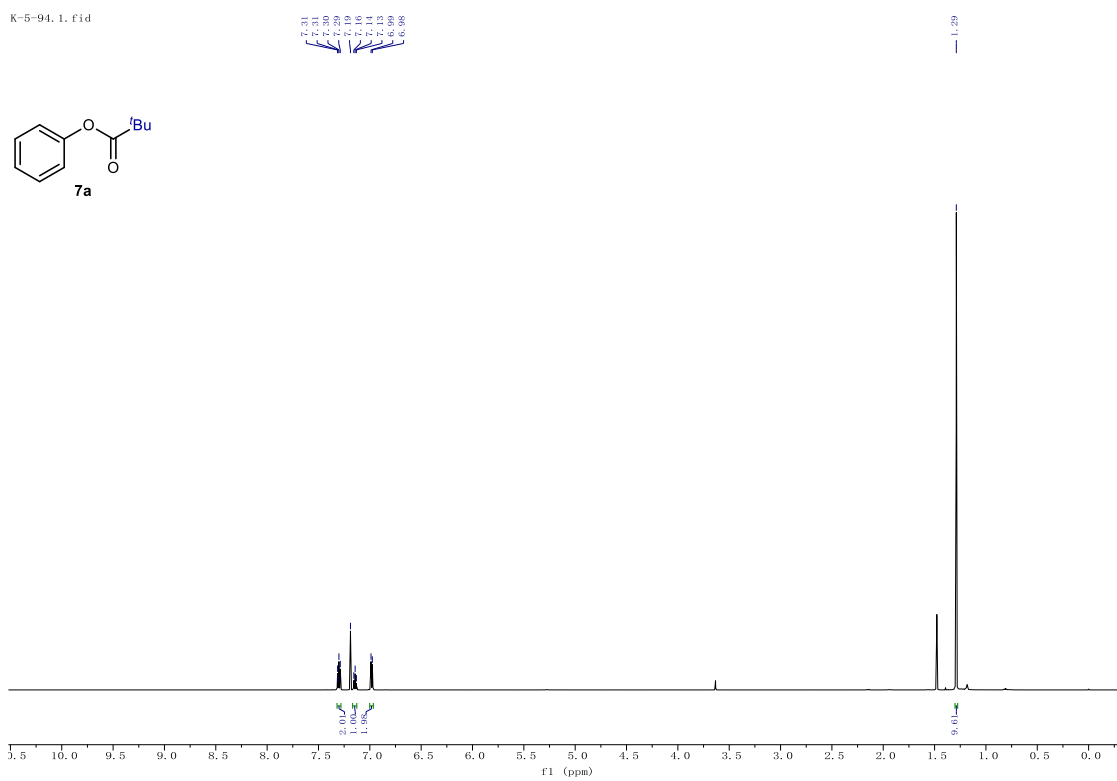

2023-1-16296.fid  
K-5-94

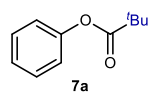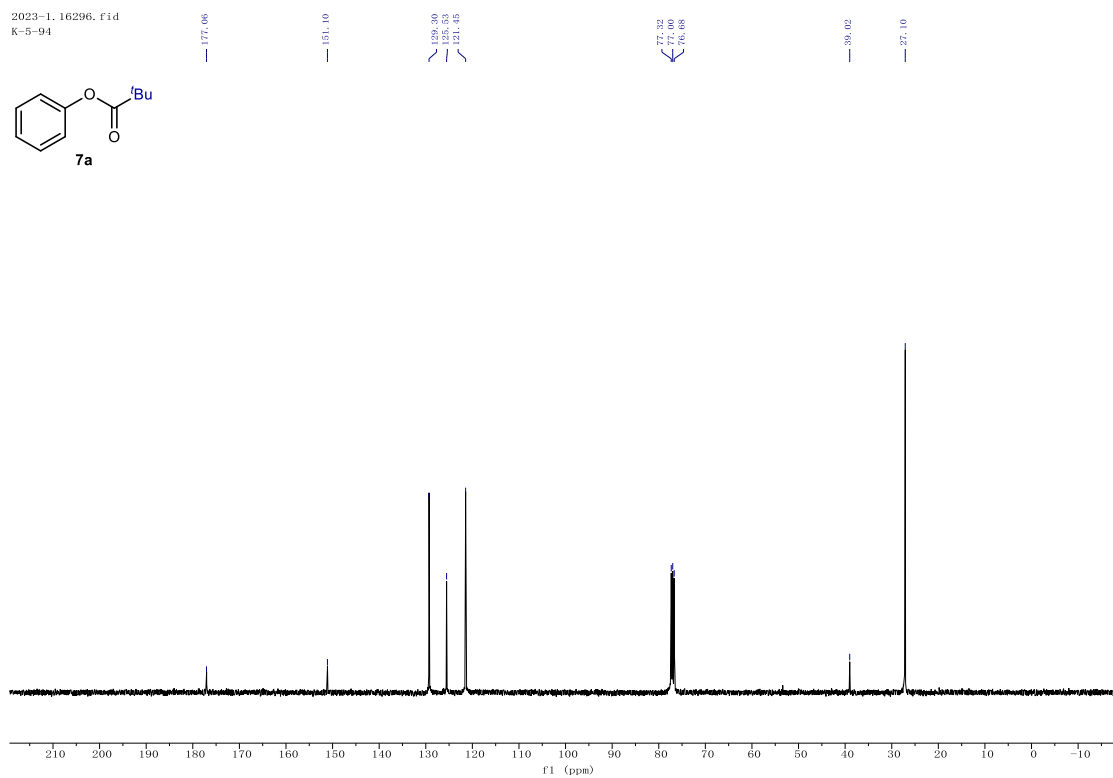

K-5-82A.1.fid

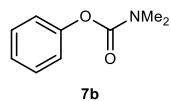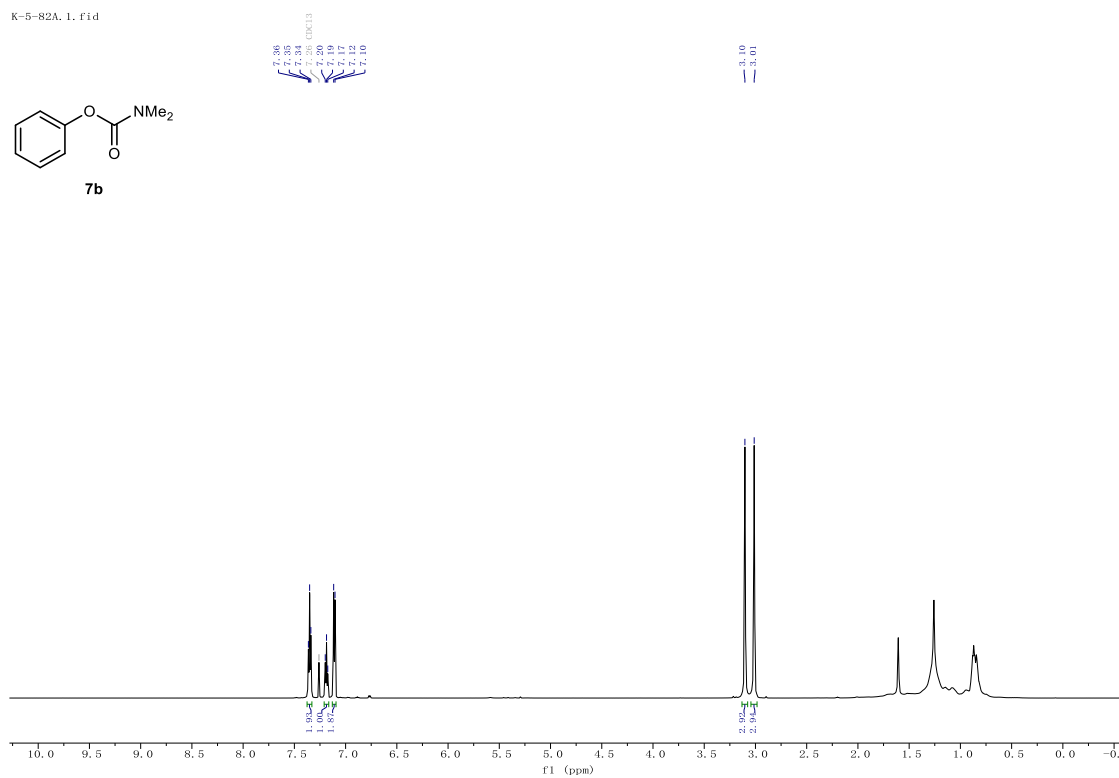



2023-1-14513.fid  
K-5-82A

154.91  
151.46

129.16  
128.11  
121.71

77.00  
77.00  
76.08

36.63  
36.39

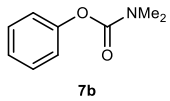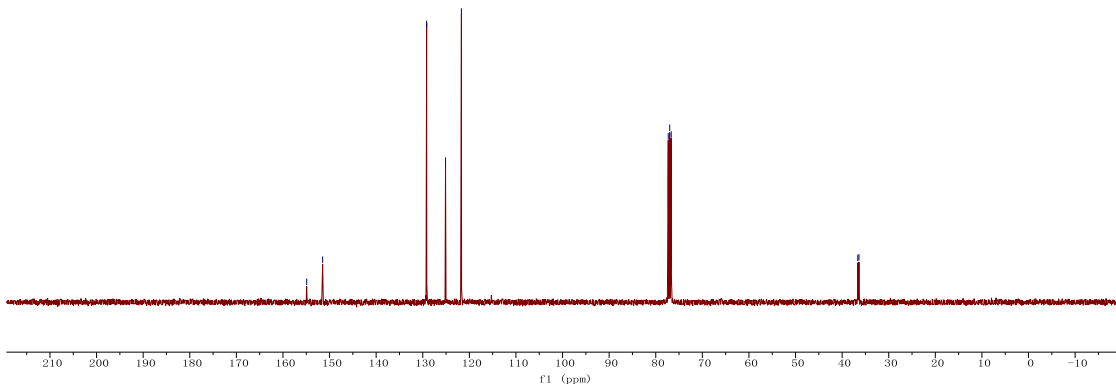

K-6-73.5.fid

7.36  
7.31  
7.32  
7.19  
7.18  
7.17  
7.11

3.45  
3.44  
3.39  
3.35

1.26  
1.20  
1.19

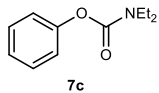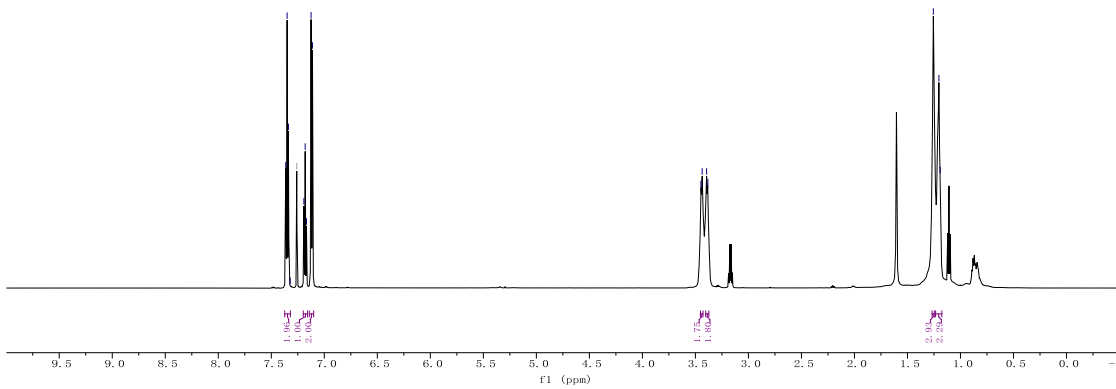

2023-1-16292.fid  
K-5-73

151.55  
151.55  
129.16  
128.01  
121.74  
77.00  
77.00  
76.08  
42.20  
41.87  
14.21  
13.37

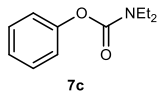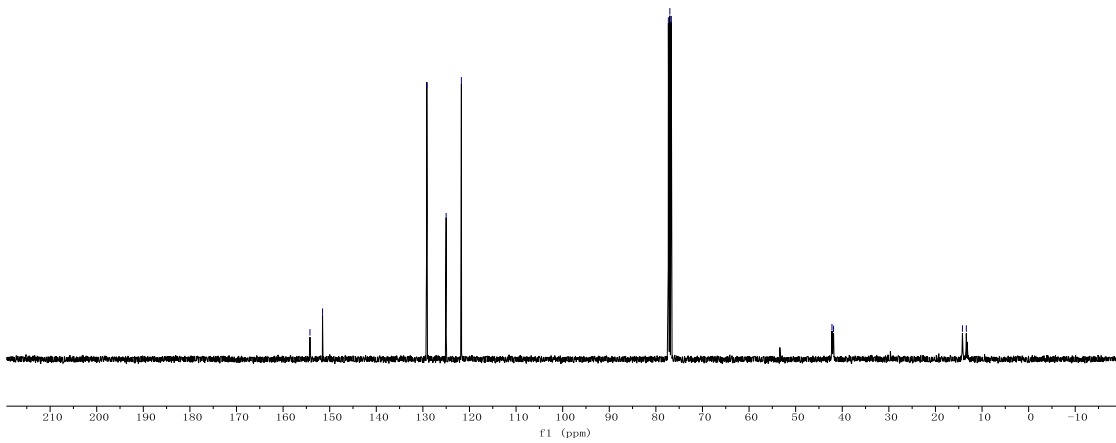

K-5-82B.1.fid

7.20 (CDCl3)  
7.13  
7.13  
6.99  
6.99  
6.98  
6.98  
3.00  
3.00  
2.33

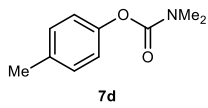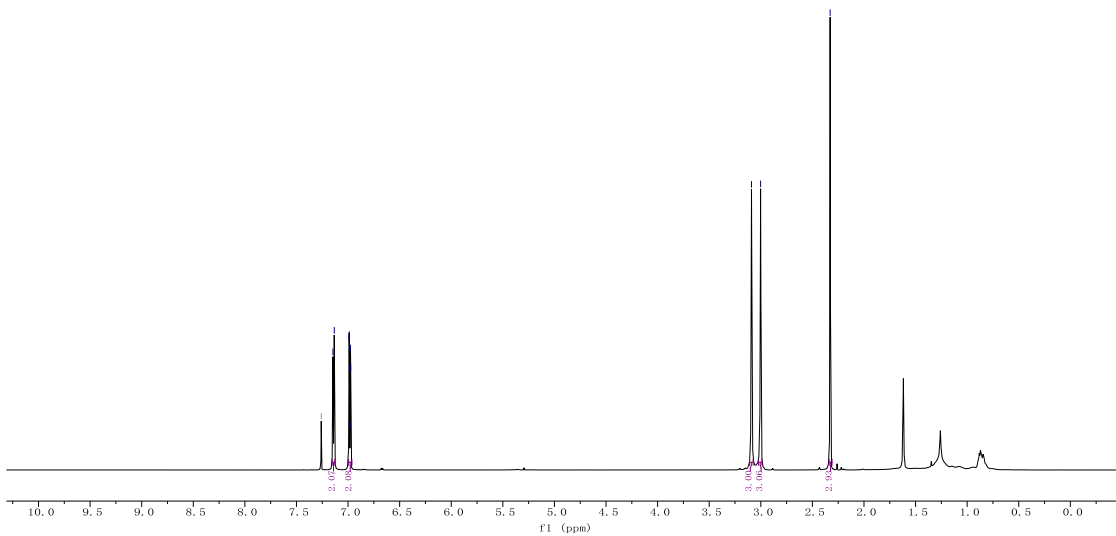

2023-1-14512.fid  
K-5-82B

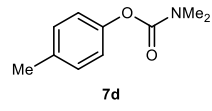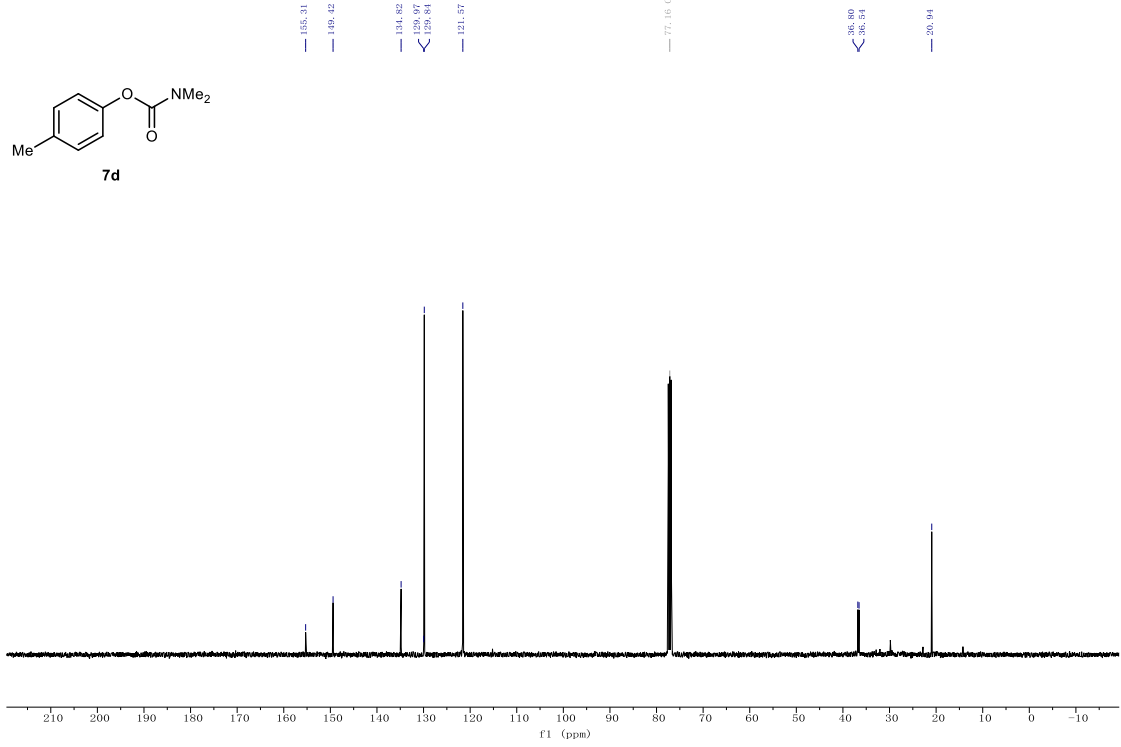

K-6-7D, 1.fid

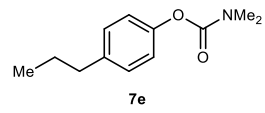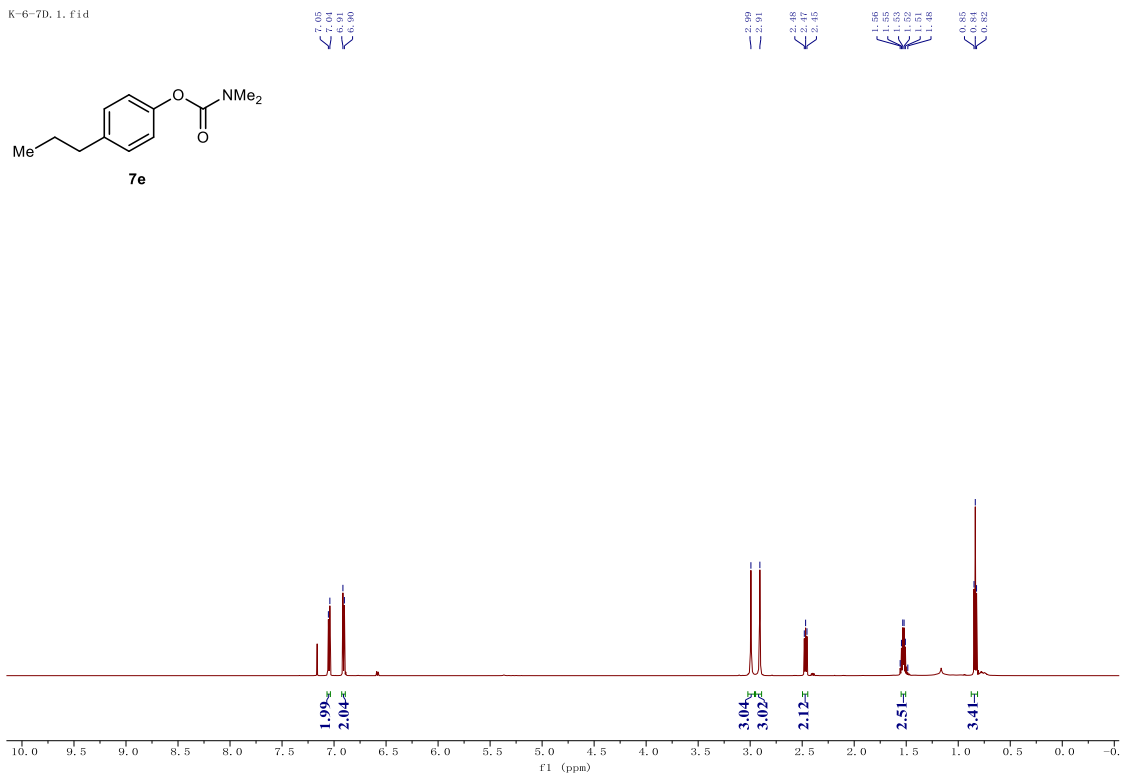

K-6-7D, 2, f1d

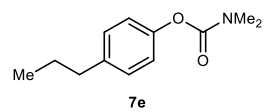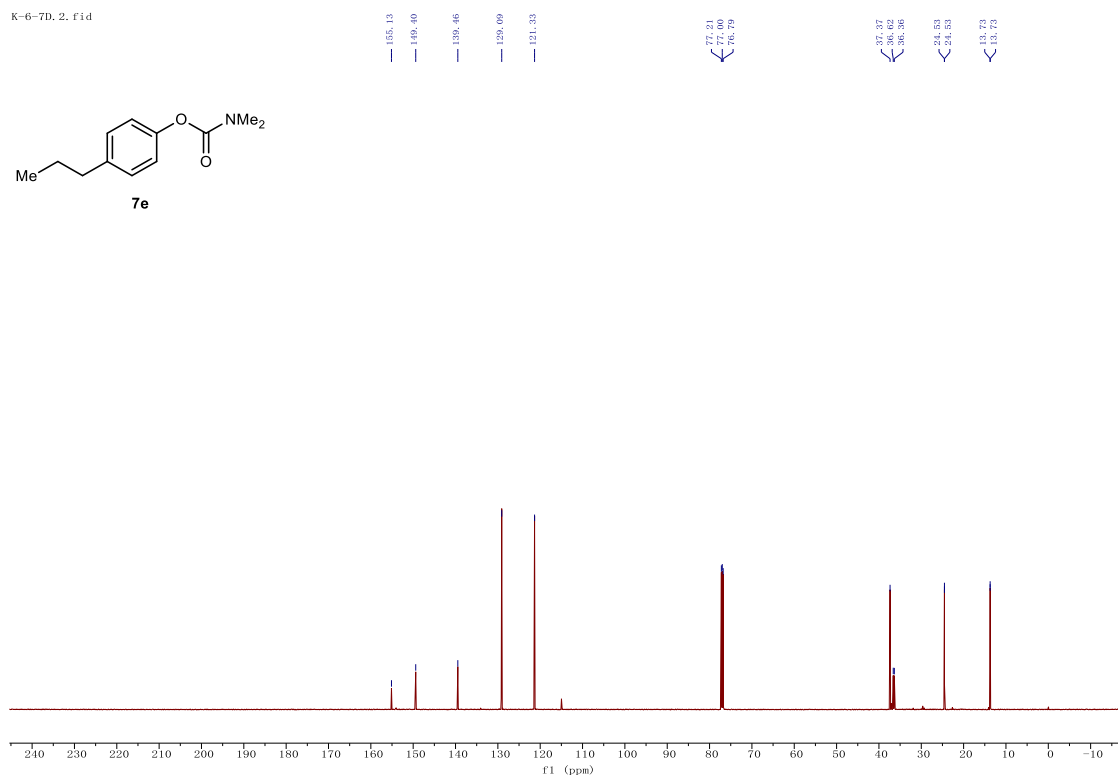

K-6-7E, 1, f1d

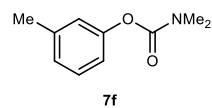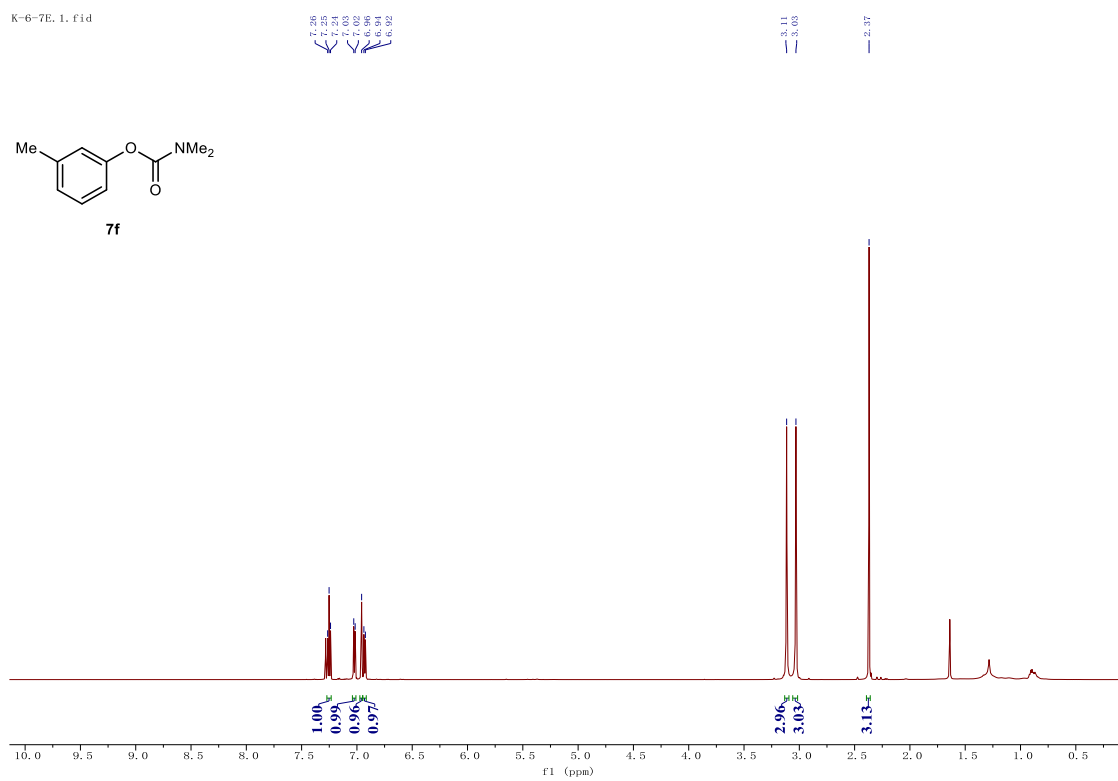

K-6-7E. 2. fid

155.65  
151.45

138.29

128.90  
125.37  
118.65

77.73  
77.00  
76.29

36.62  
36.38

21.26

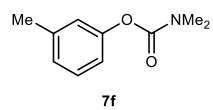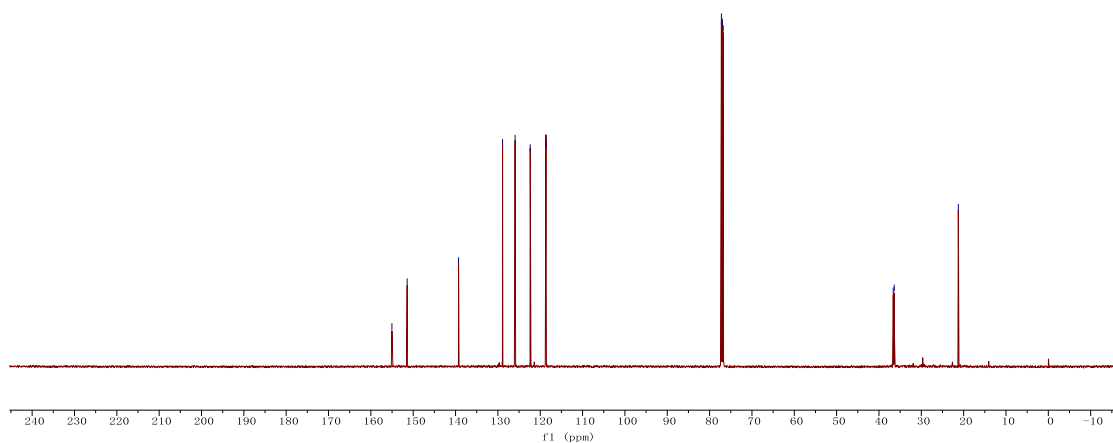

K-6-7C. 1. fid

6.91  
6.89  
6.83  
6.82

3.19  
2.91

2.19  
2.07

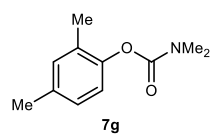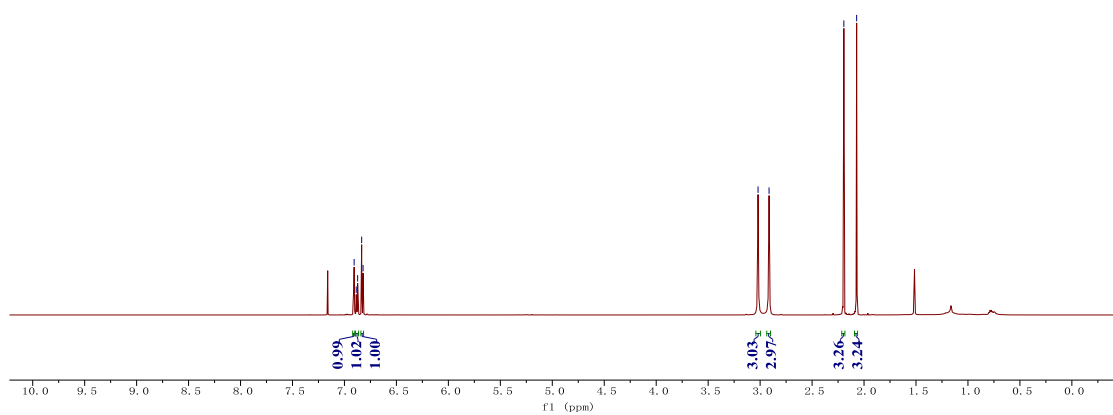

K-6-7C. 2. fid

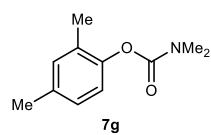

154.86  
147.72  
138.84  
135.89  
127.25  
121.85  
77.00  
76.79  
36.09  
35.33  
20.74  
16.00  
15.99

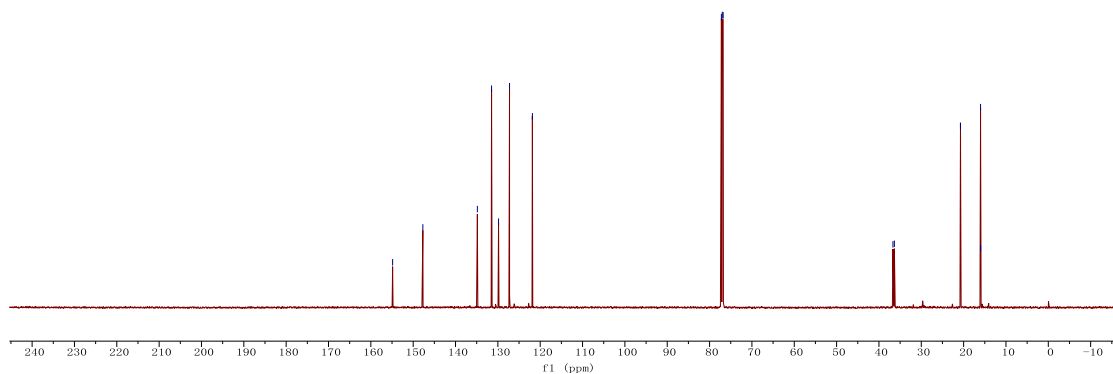

K-6-20. 1. fid

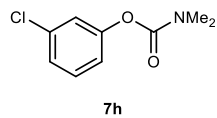

7.29  
7.24  
7.20  
7.18  
7.15  
7.03  
7.02  
7.02  
3.09  
3.01

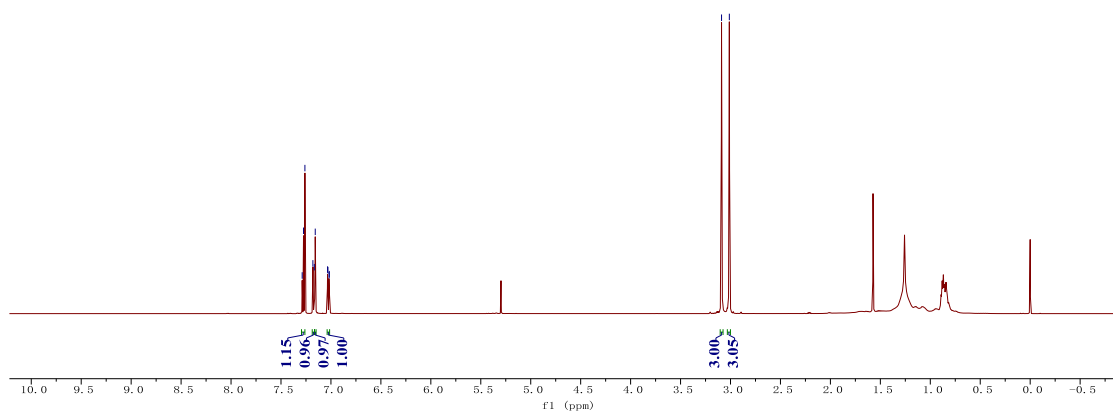

2023-1-16089.fid  
K-6-20

153.82  
153.01

134.41  
129.86  
127.42  
126.12

77.00  
76.08

38.73  
38.14

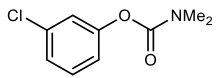

7h

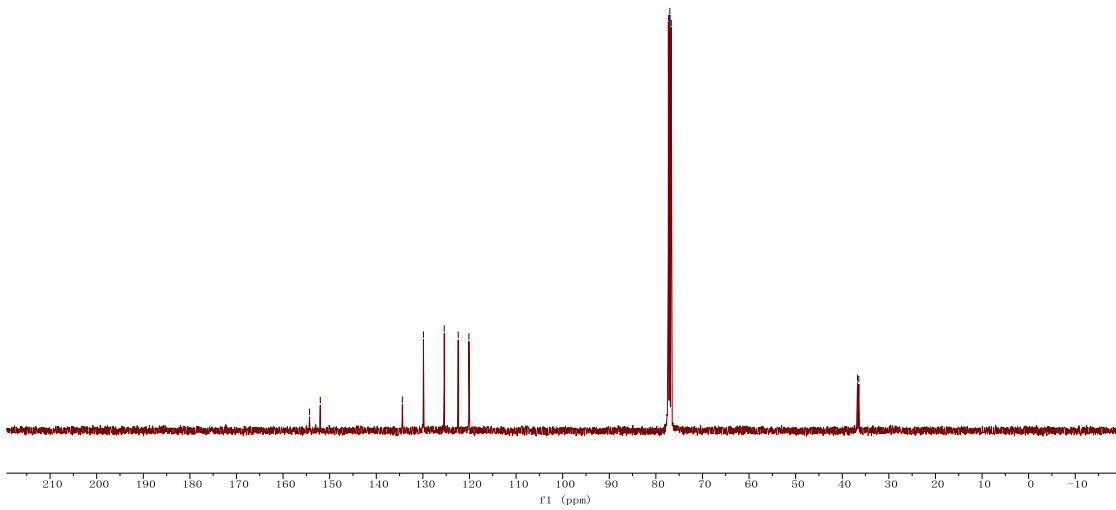

K-6-74.1.fid

7.30  
7.29  
7.28  
7.28 (int. 1.3)

6.90

3.09  
3.01

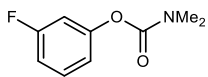

7i

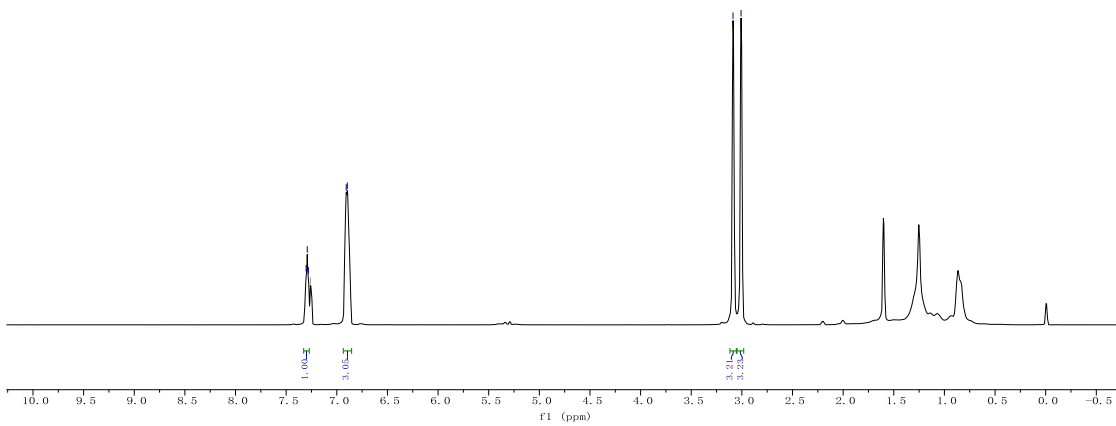

K-6-74.2.fid

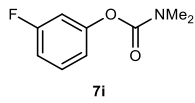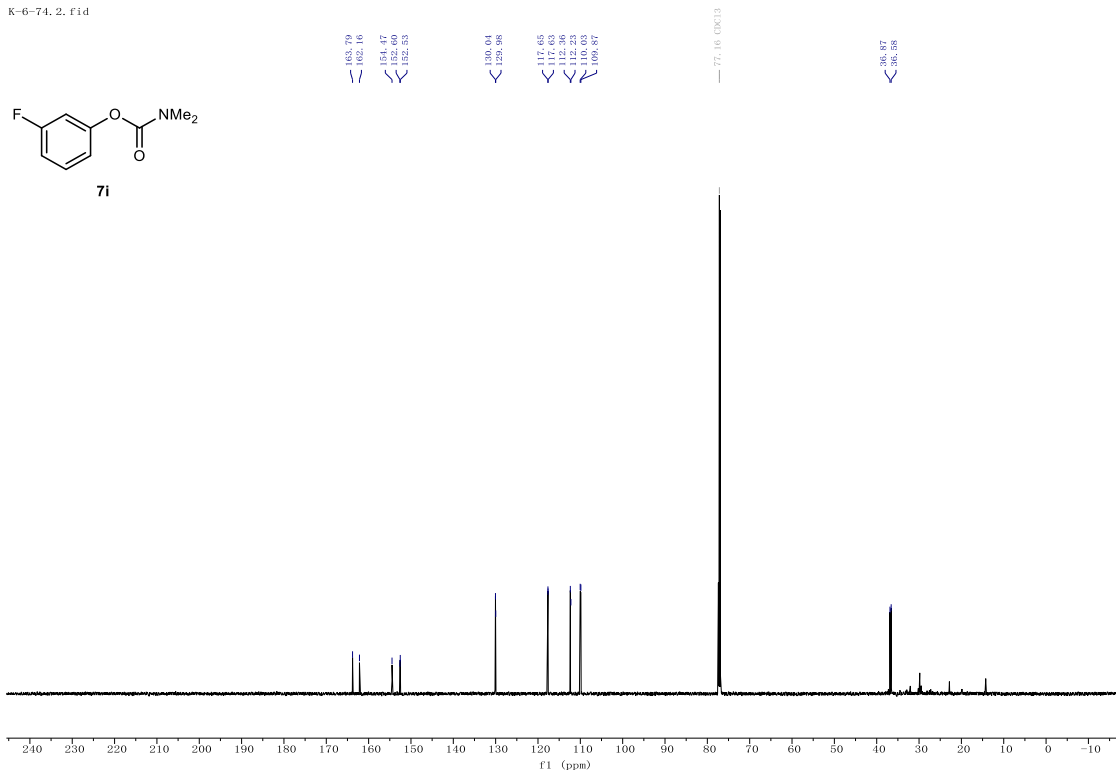

K-6-7F.1.fid

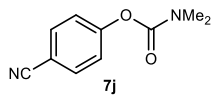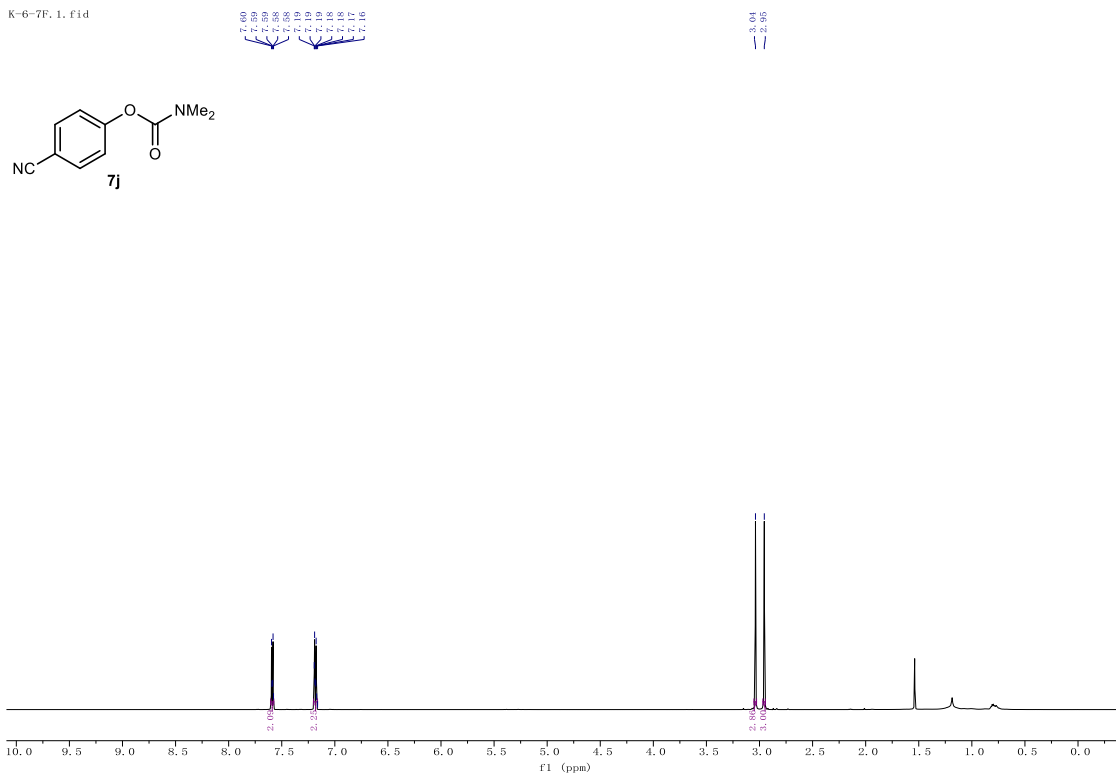



K-6-7F. 2. fid

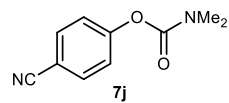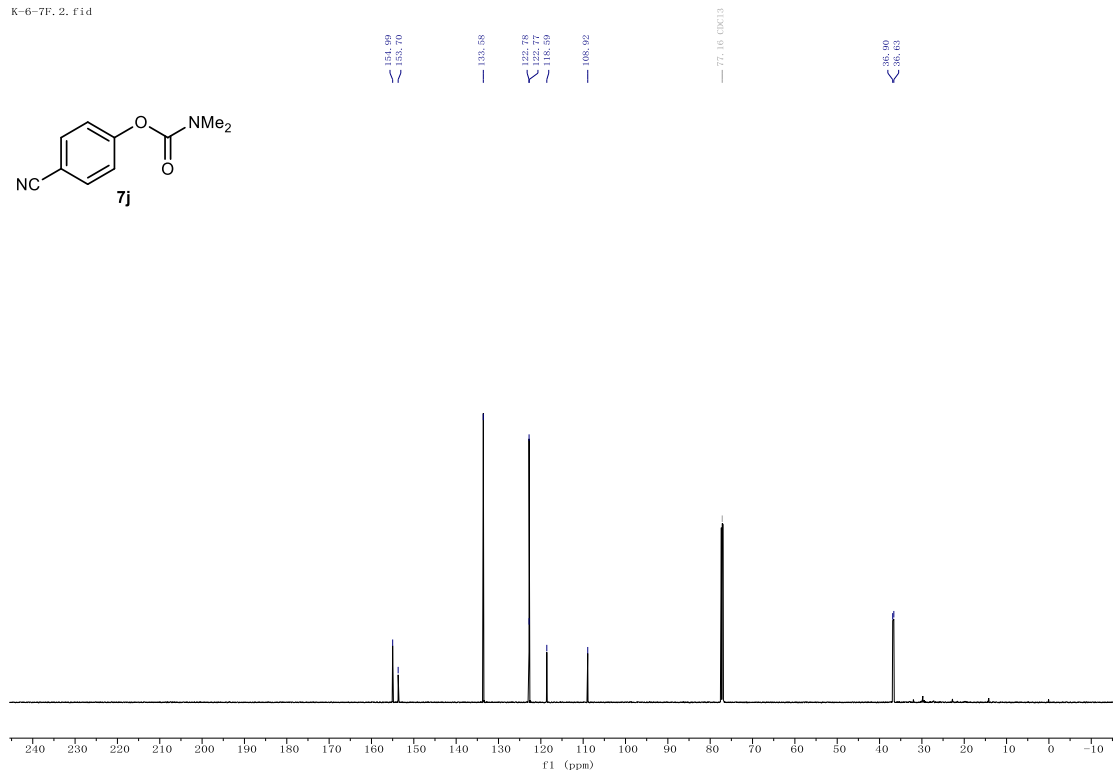

LJ-2-23-pure. 1. fid

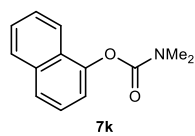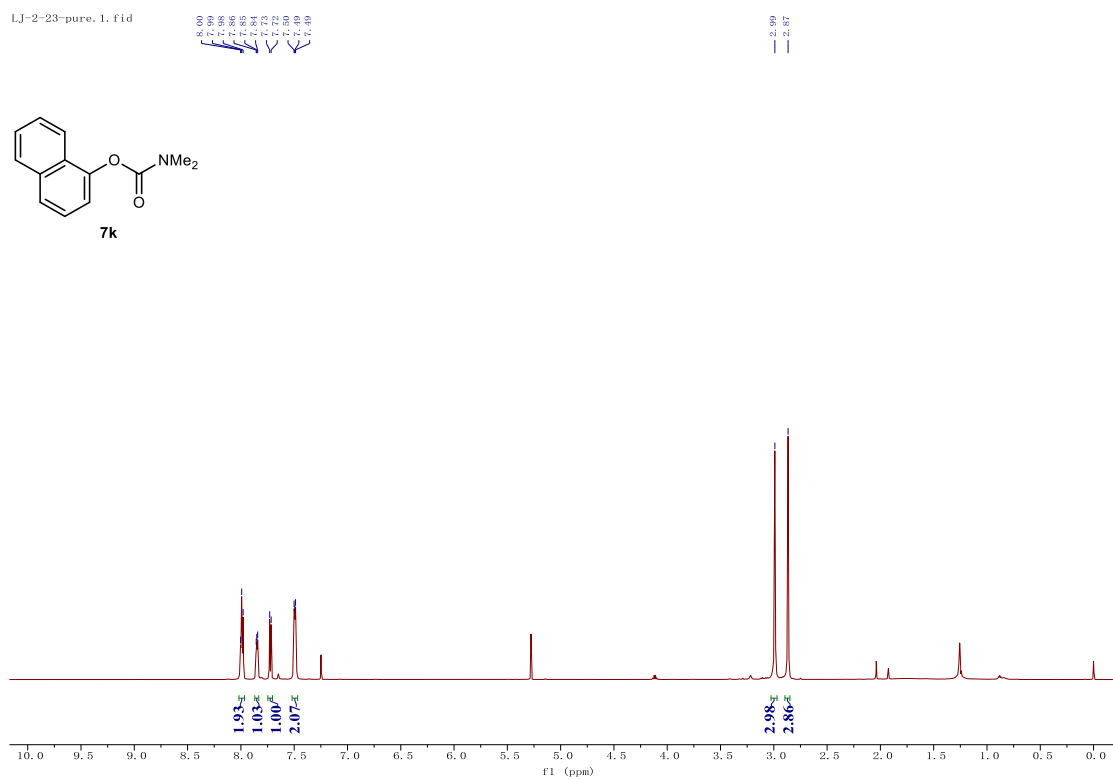

2023-1-14293.fid  
LJ-2-9

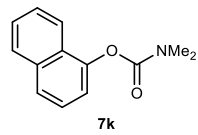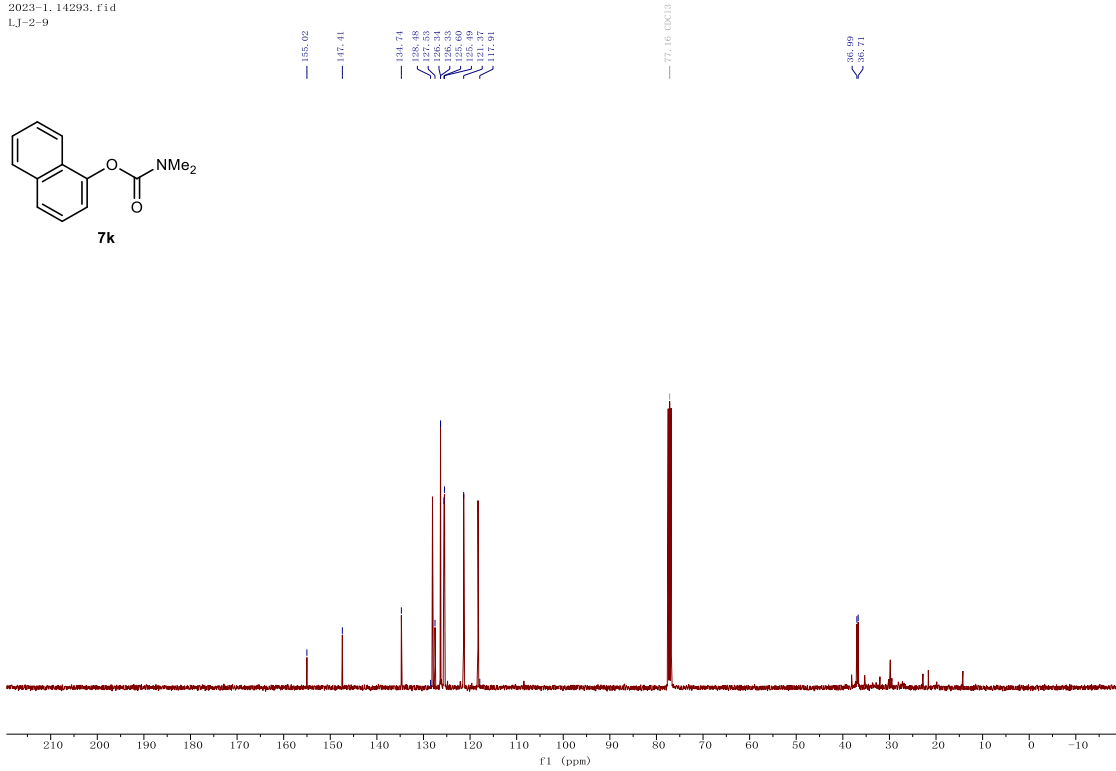

K-6-76. 1.1. 1r

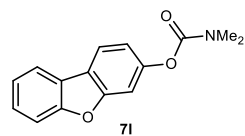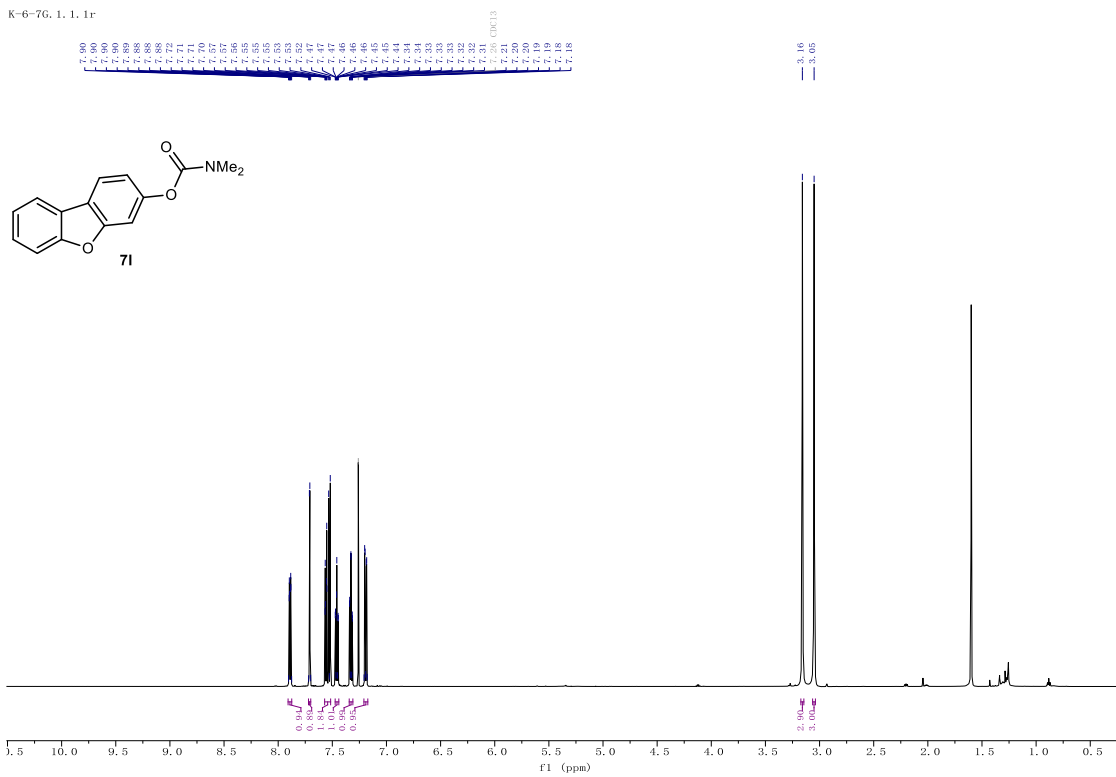

K-6-76. 2. fid

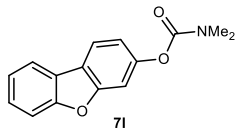

156.92  
152.35  
147.03

127.39  
124.76  
122.67  
120.99  
118.83  
111.79  
111.75

77.00  
77.00  
76.79

38.79  
38.43

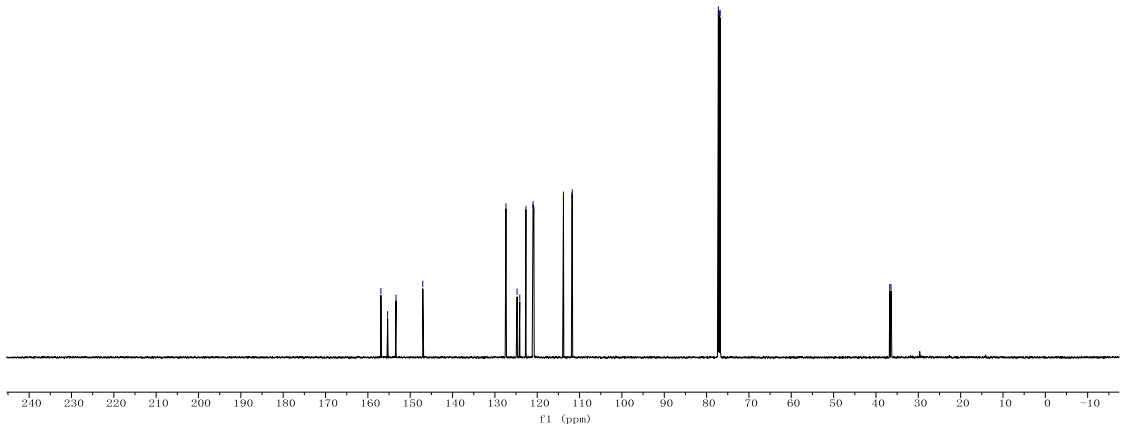

K-6-44. 1. fid

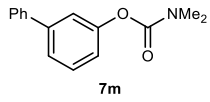

7.60  
7.59  
7.43  
7.42  
7.36 (CDCl3)  
7.12  
7.11

3.13  
3.01

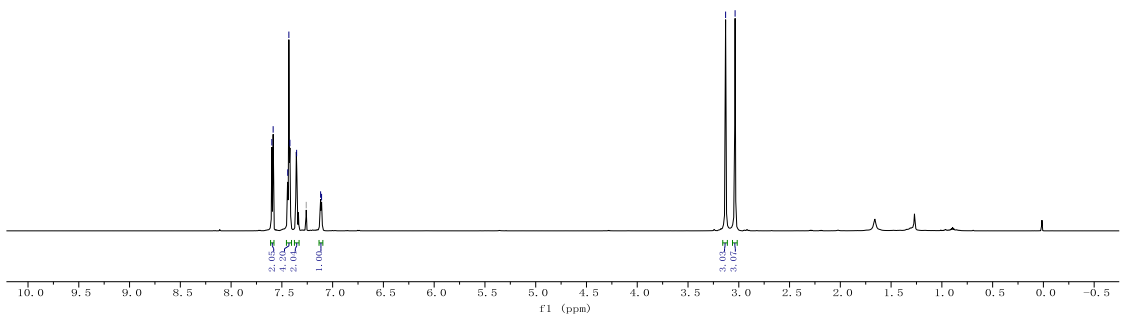

K-6-44.2.fid

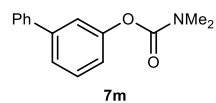

155.04  
152.04  
152.02  
142.73  
140.52  
139.82  
139.62  
138.86  
137.64  
137.63  
134.08  
130.70  
130.68

77.16 (CDCl<sub>3</sub>)

38.84  
38.60

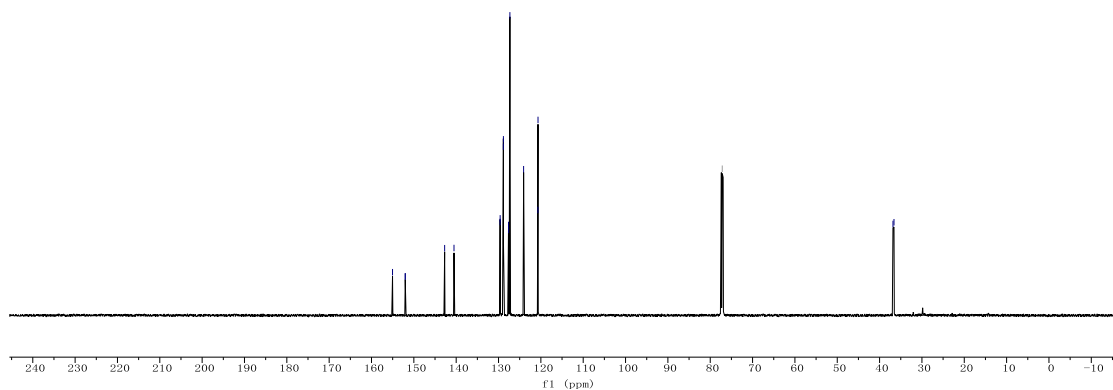

K-6-65.1.fid

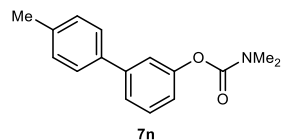

7.48  
7.41  
7.40  
7.33  
7.30  
7.23  
7.09  
7.08  
7.07

3.13  
3.03

2.89

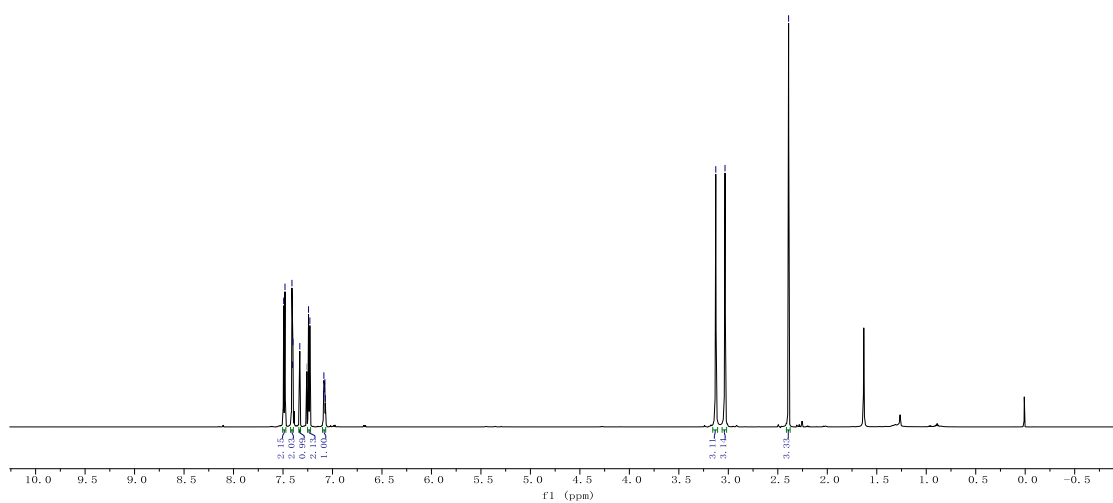

K-6-65.2.fid

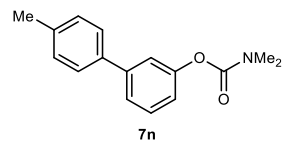

155.06  
152.09  
142.65  
137.82  
129.56  
127.12  
126.81  
120.38

77.16 (CDCl<sub>3</sub>)

36.83  
36.59

31.21

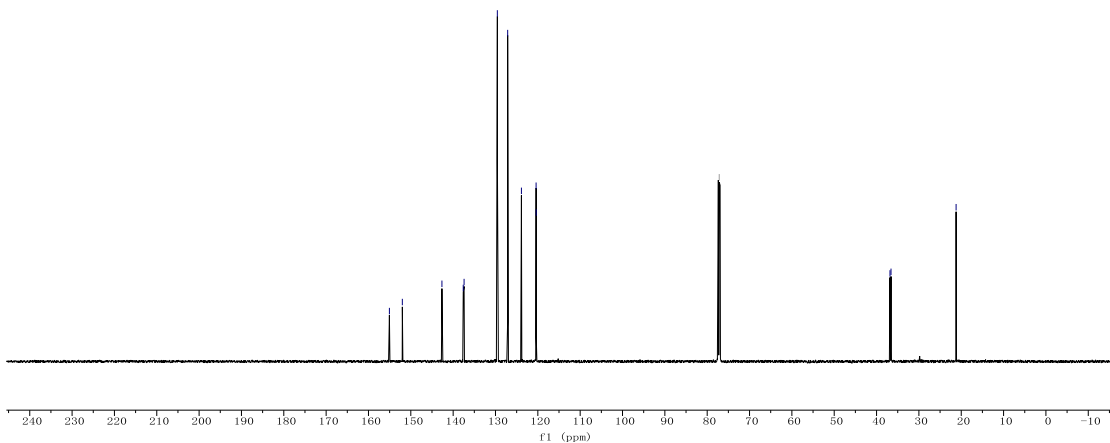

2023-1-15039.fid  
K-6-112

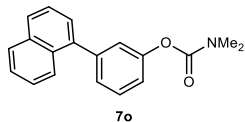

7.95  
7.93  
7.91  
7.87  
7.85  
7.62  
7.50  
7.47  
7.45  
7.35  
7.33  
7.26 (CDCl<sub>3</sub>)  
7.22  
7.22  
7.21  
7.20  
7.20  
7.20

3.13  
3.04

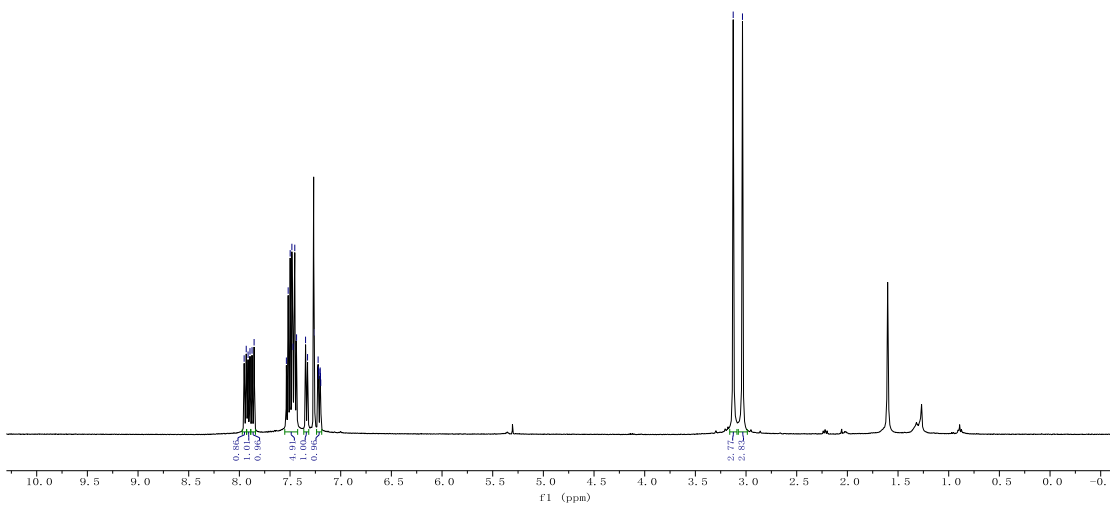

2023-1-15346.fid  
K-6-112

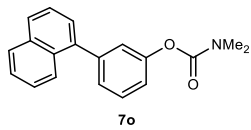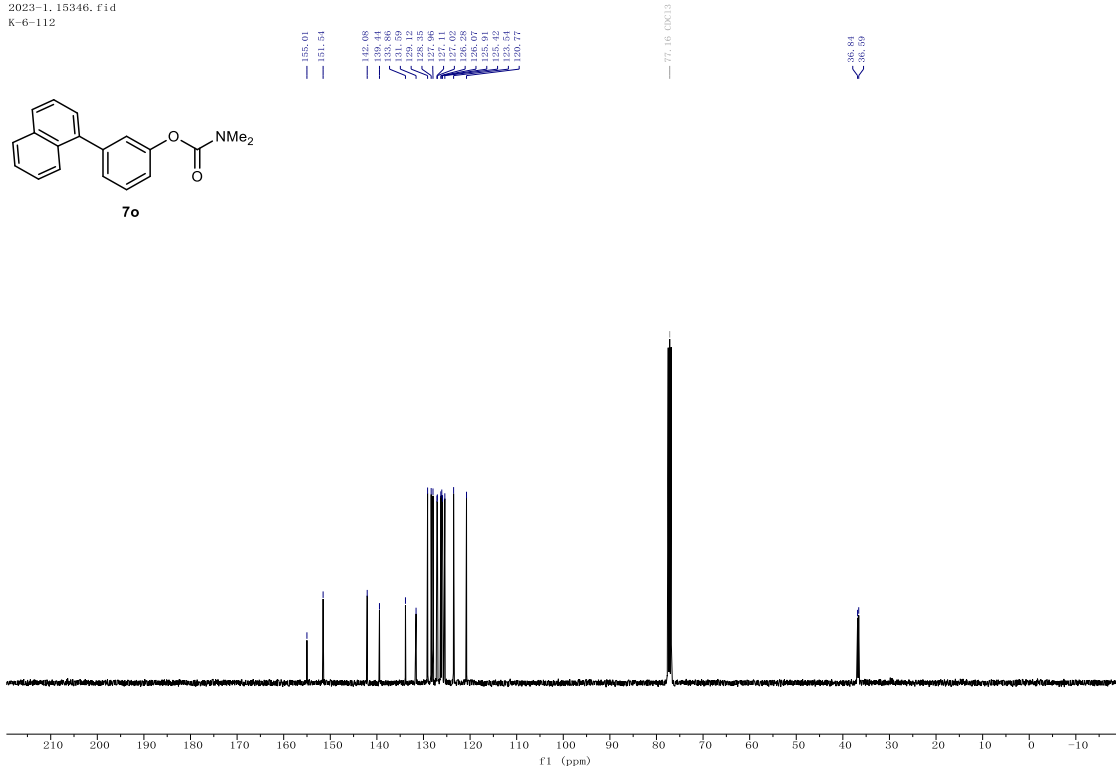

K-6-49.1.fid

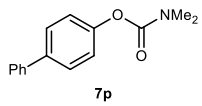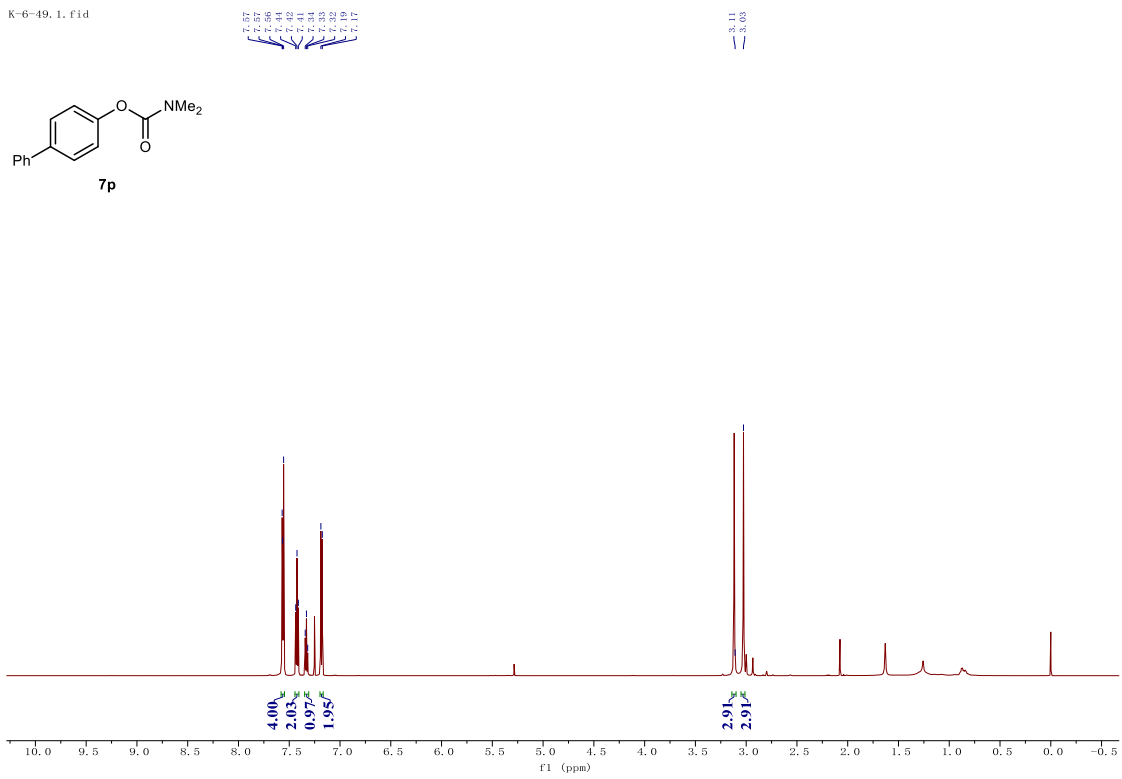



2023-1\_14515.fid  
K-6-66

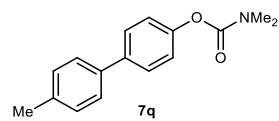

155.08  
150.89  
138.36  
137.05  
129.58  
129.54  
127.05  
122.97

77.16 CDCl<sub>3</sub>

38.84  
36.58

21.19

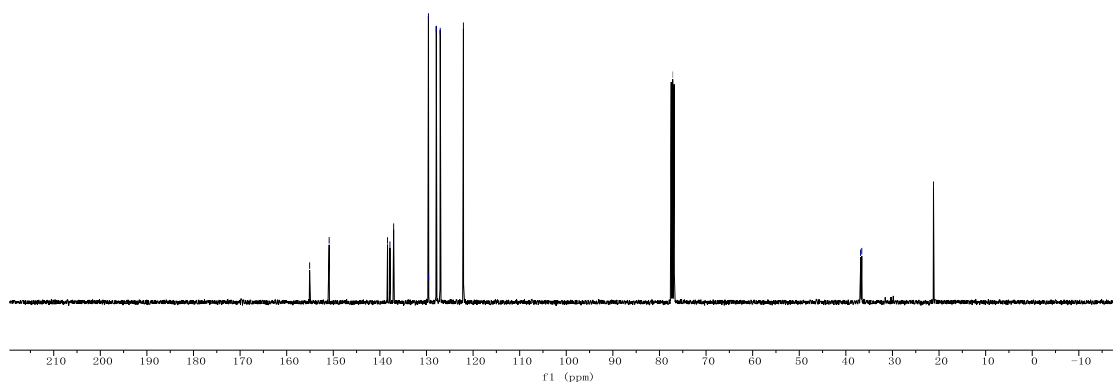

2023-1\_15550.fid  
K-6-123

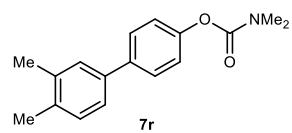

7.66  
7.54  
7.35  
7.29  
7.26  
7.18  
7.17  
7.16

3.12  
3.03

2.33  
2.30

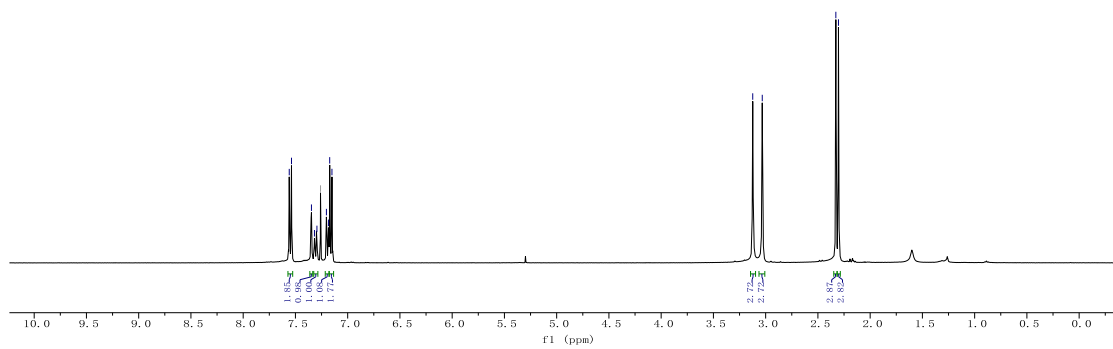



2023-1-14297.fid  
K-6-123

154.97  
150.67  
138.33  
138.17  
138.86  
138.59  
138.33  
127.76  
127.82  
124.82

77.00  
77.00  
76.08

38.70  
38.44

19.89  
19.39

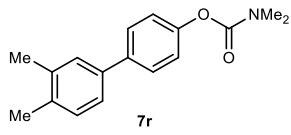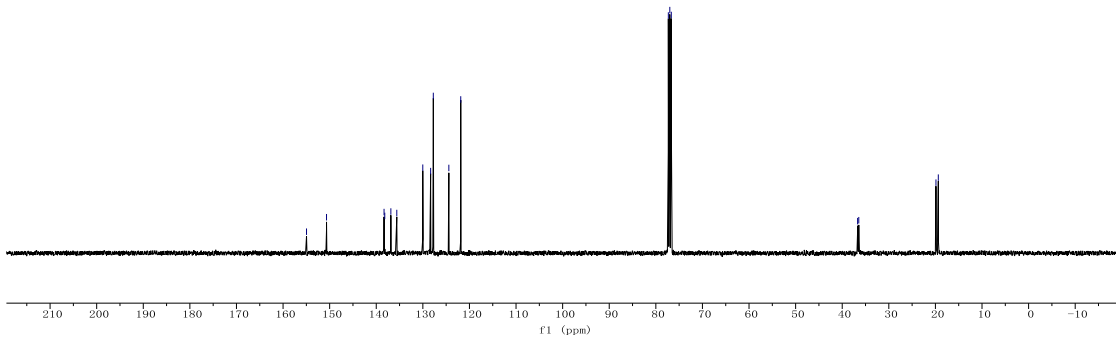

K-6-75.1.fid

9.45  
9.45  
9.44

7.87  
7.86  
7.86  
7.87  
7.86  
7.86  
7.60  
7.60  
7.58  
7.58  
7.57  
7.57  
7.36  
7.36  
7.34

3.89  
3.49  
3.47  
3.33 (MSD-06)

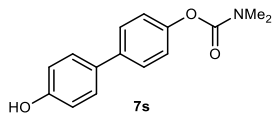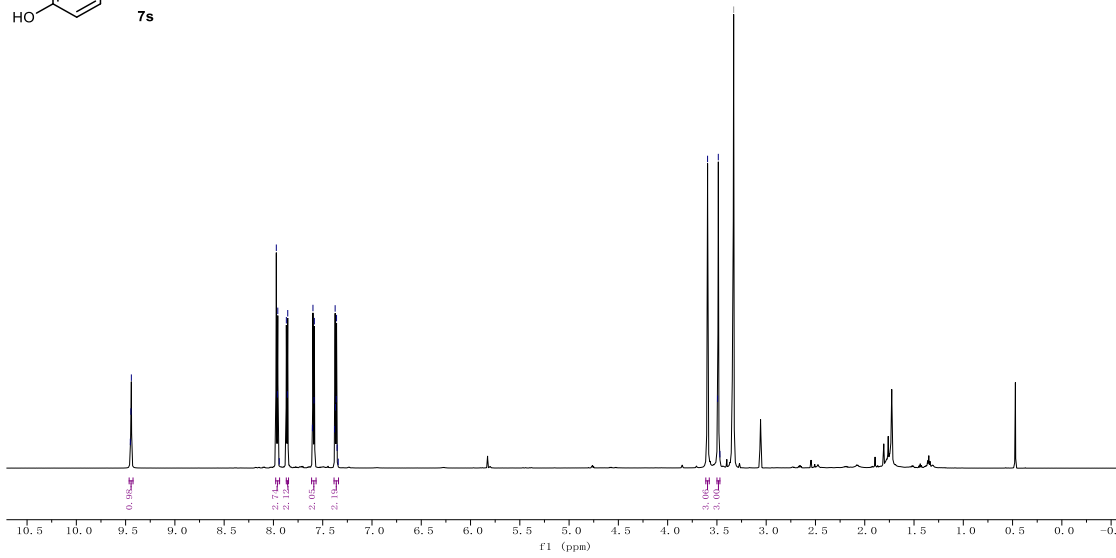



2023-1-14510.fid  
K-5-82E

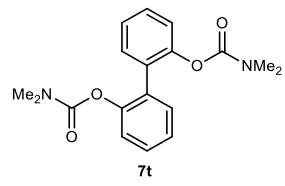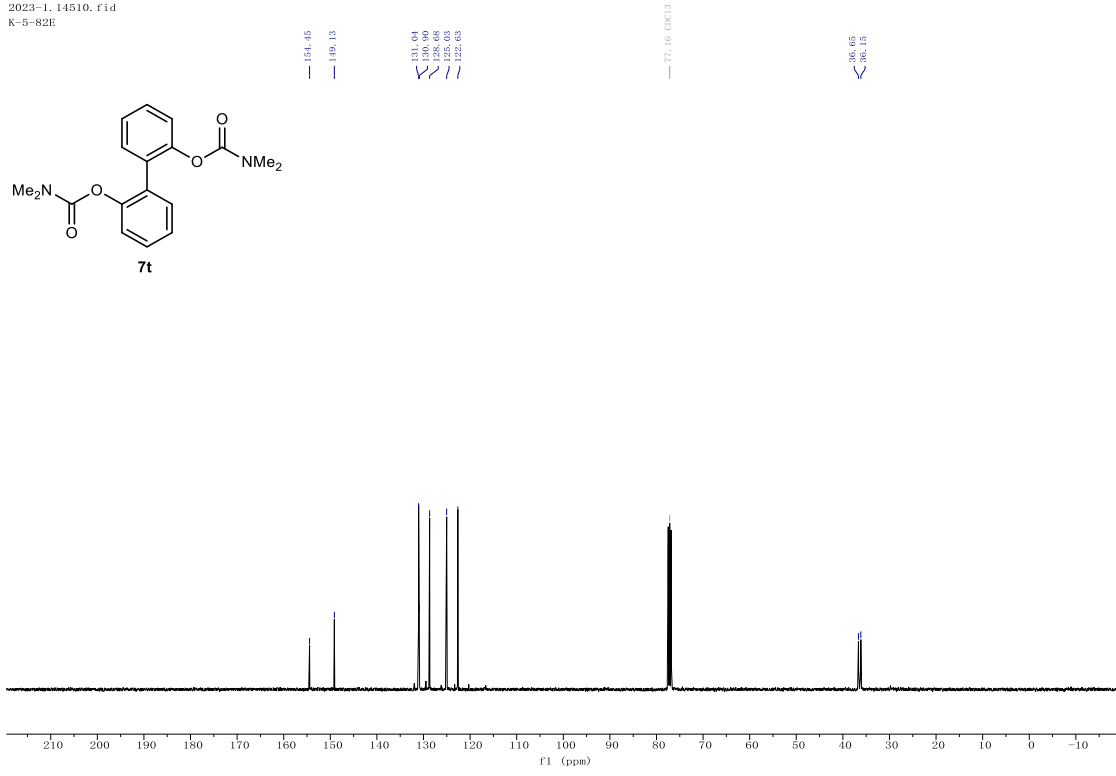

2023-1-15046.fid  
K-6-19-B

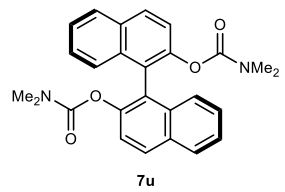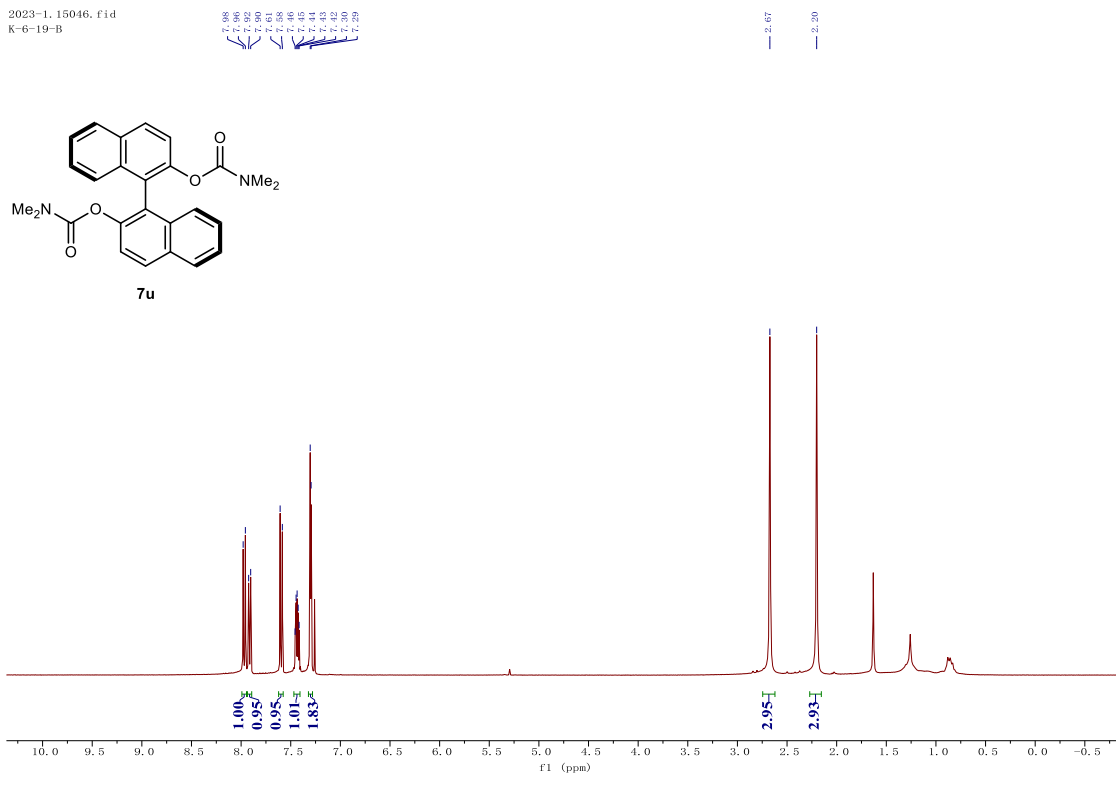

K-6-19B. 2. fid

154.10  
147.45  
132.31  
131.13  
130.13  
127.79  
126.96  
125.24  
122.61  
122.51

77.00  
77.00  
76.79

36.27  
35.52

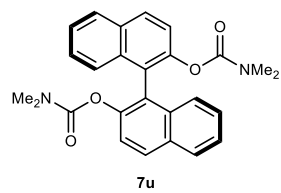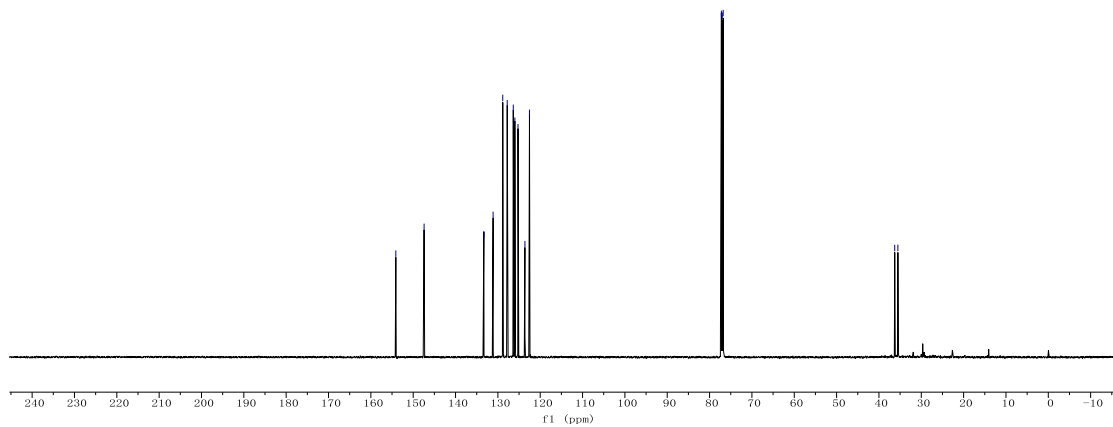

2023-1-17132. fid  
K-6-50

7.47  
7.45  
7.01  
6.99

3.00  
3.00

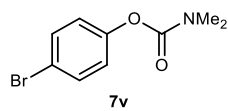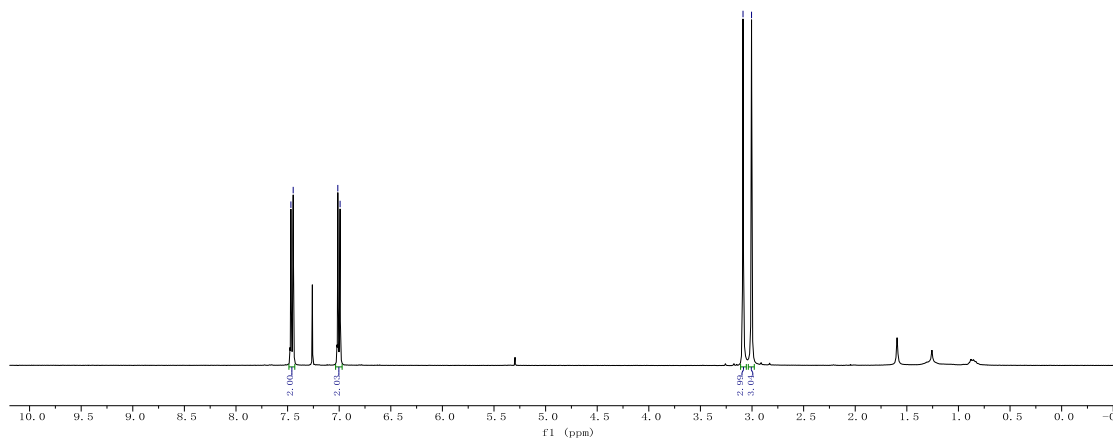





2023-1\_14285.fid  
K-6-120

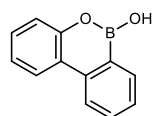

2a

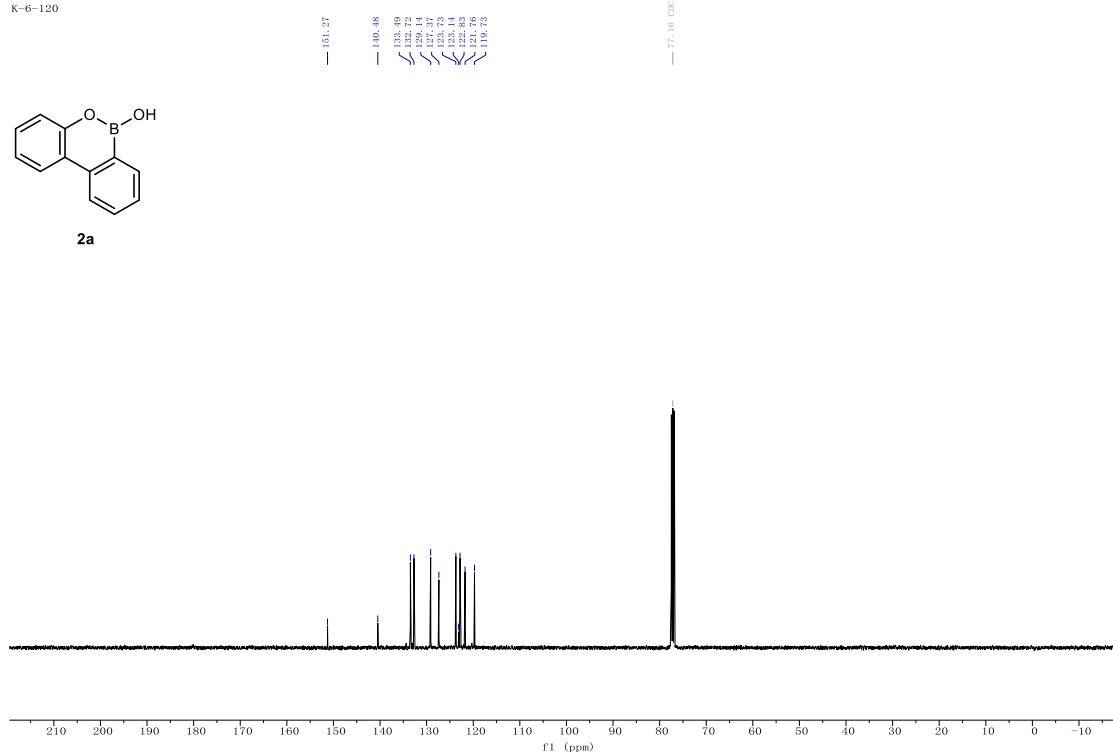

2024-1\_10508.fid  
K 6-01

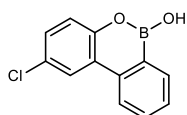

2b

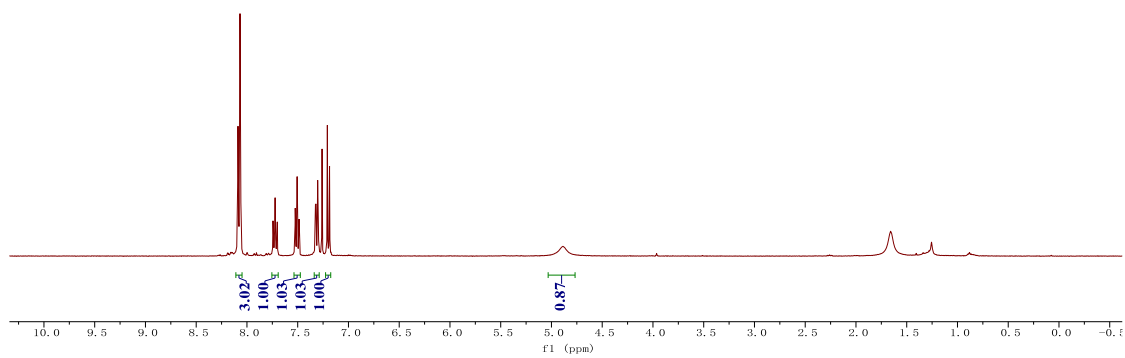

K-6-30.2.fid

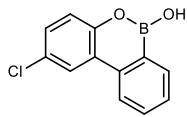

2b

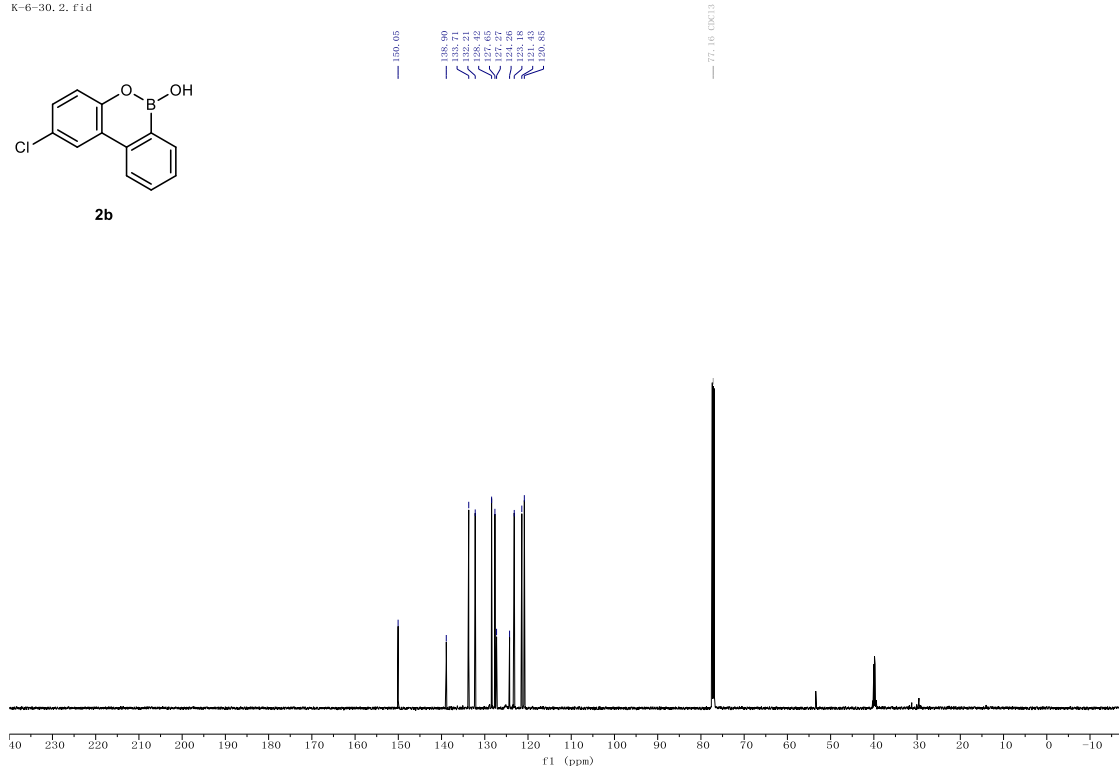

2023-1-15711.fid  
K-6-139P

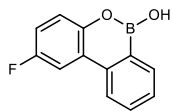

2c

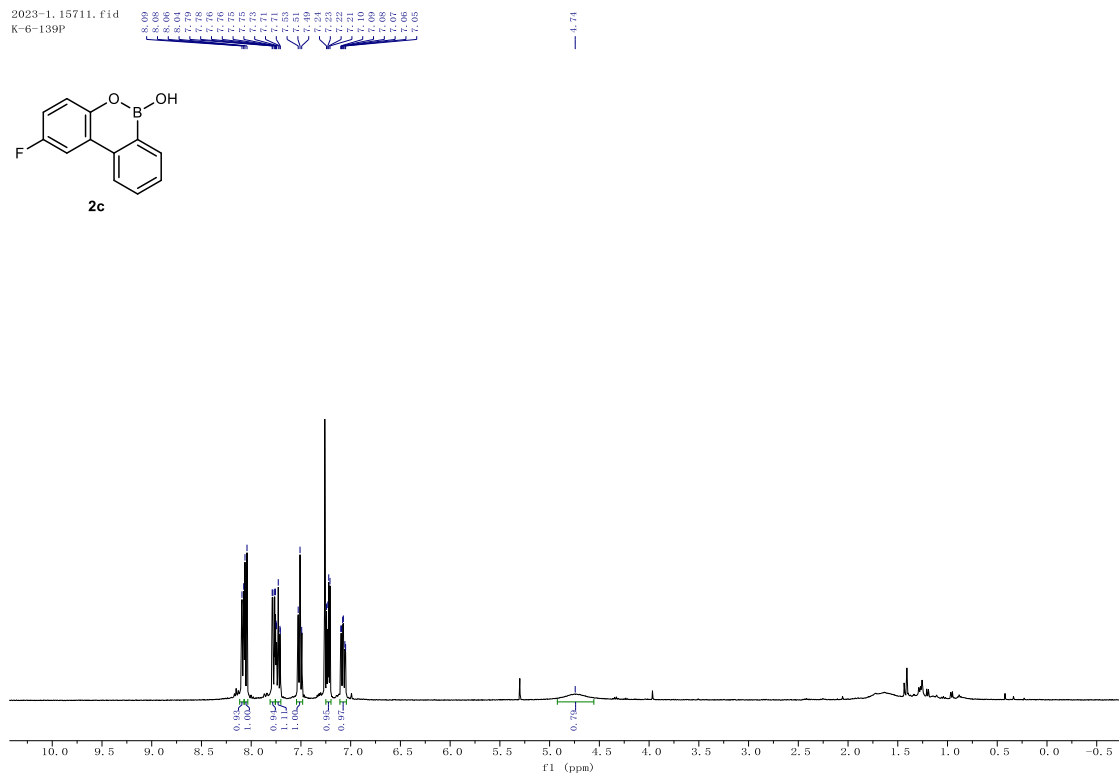



2023-1-18246.fid  
K-6-139

151.32  
136.80  
147.19  
138.53  
133.45  
132.70  
127.84  
124.82  
120.86  
118.76  
109.69  
109.36

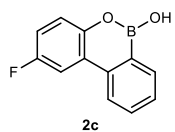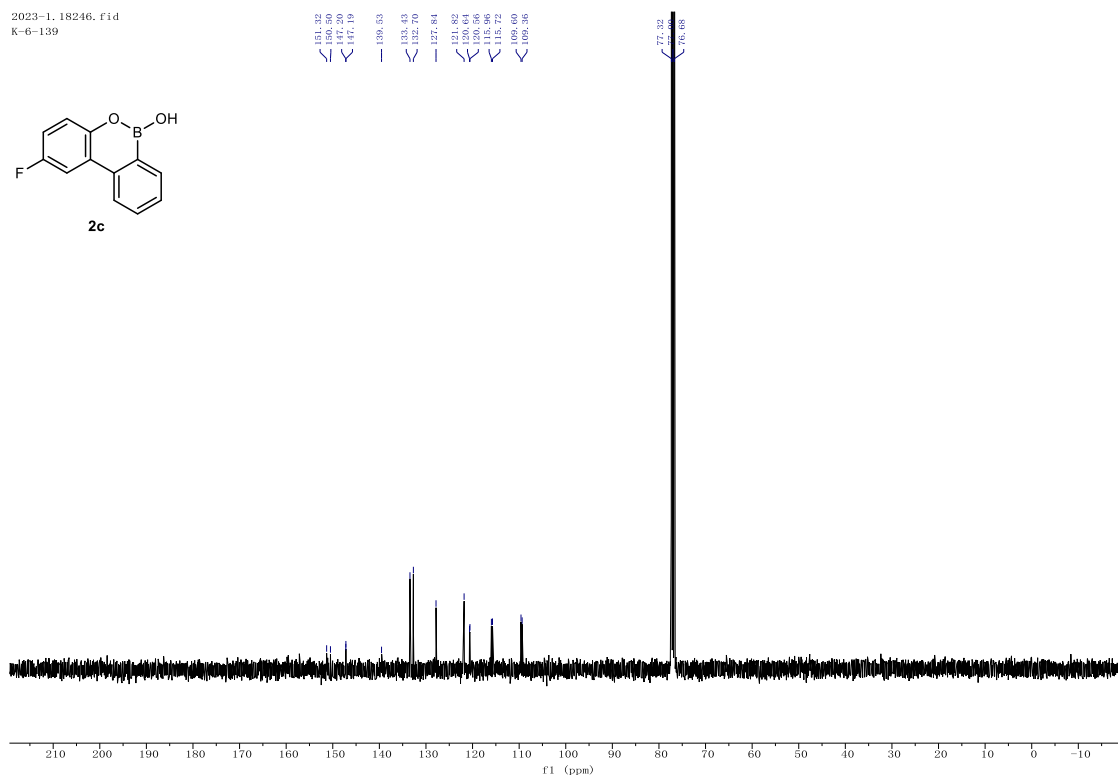

2023-1-15713.fid  
K-6-142P

8.25  
8.22  
8.05  
8.07  
7.75  
7.71  
7.55  
7.49  
7.41  
7.11

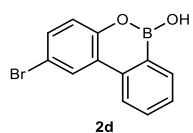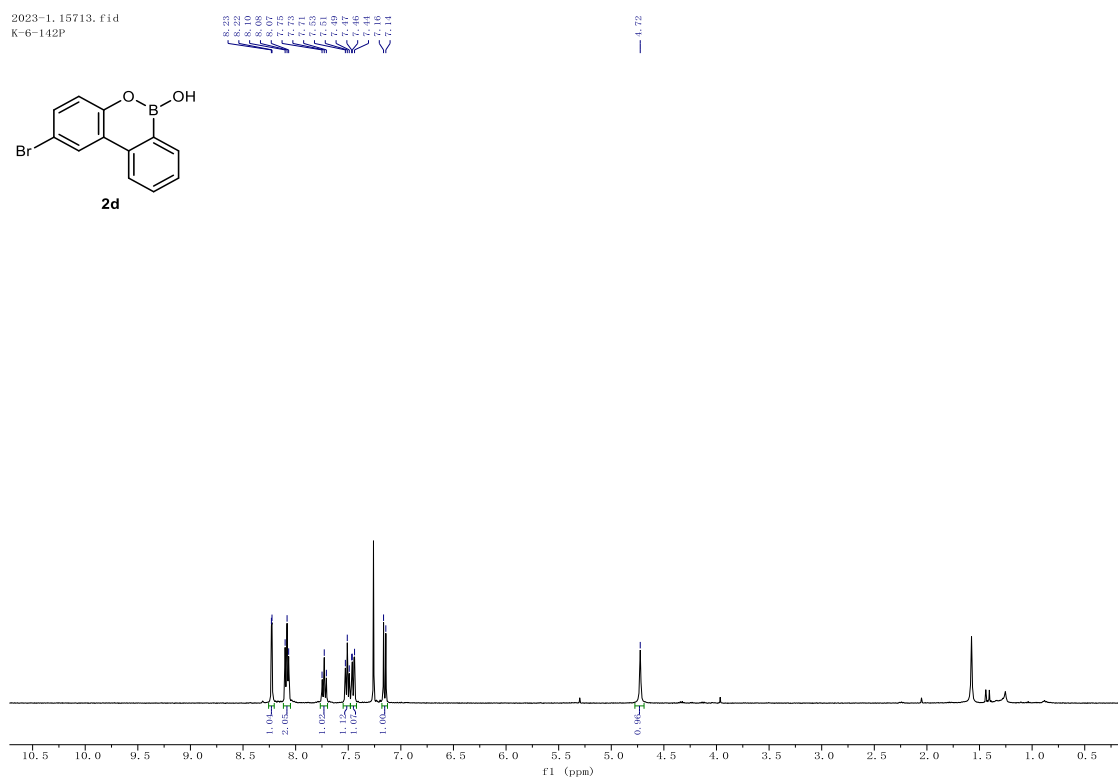

2023-1-18245.fid  
K-6-142

156.45  
138.79  
133.65  
132.38  
127.61  
126.16  
121.38  
121.23  
114.77

77.00  
76.08

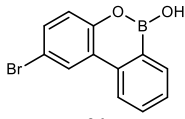

CDCl<sub>3</sub> + DMSO-D<sub>6</sub>

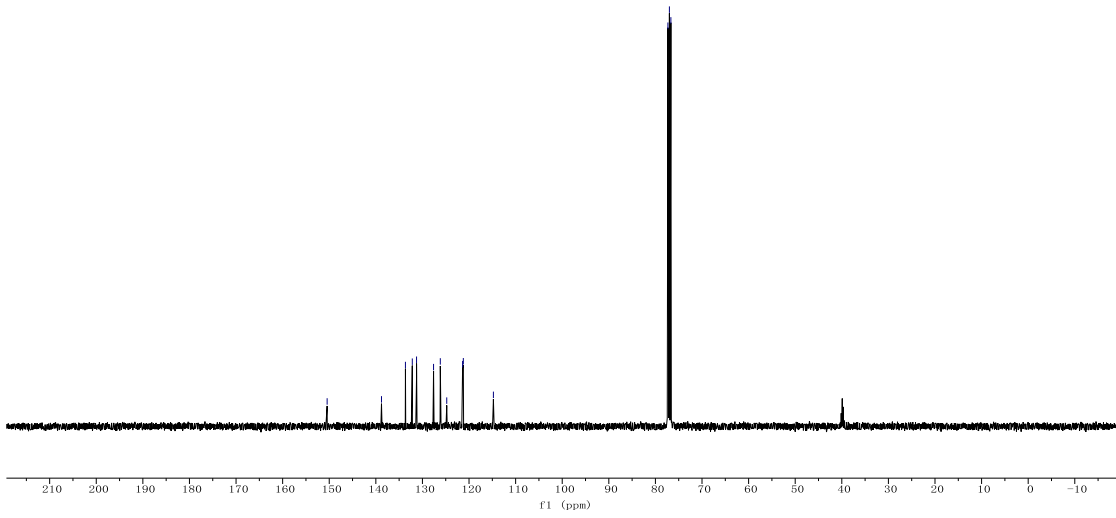

K-6-32.1.fid

8.12  
8.01  
8.02  
7.75  
7.72  
7.72  
7.70  
7.55  
7.53  
7.21  
7.22  
7.22

5.17

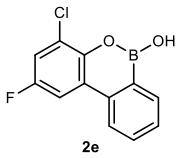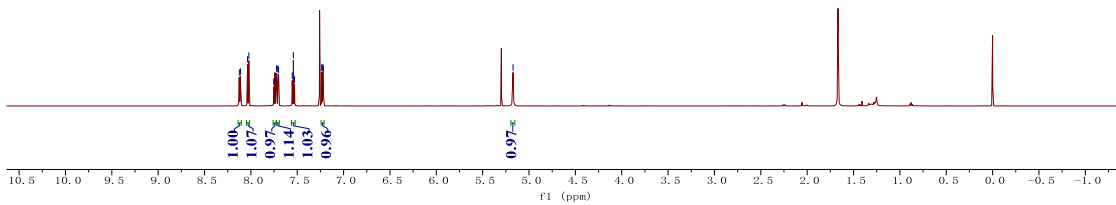

2023-1\_14287.fid  
K-6-32

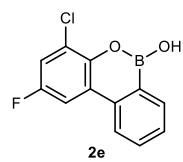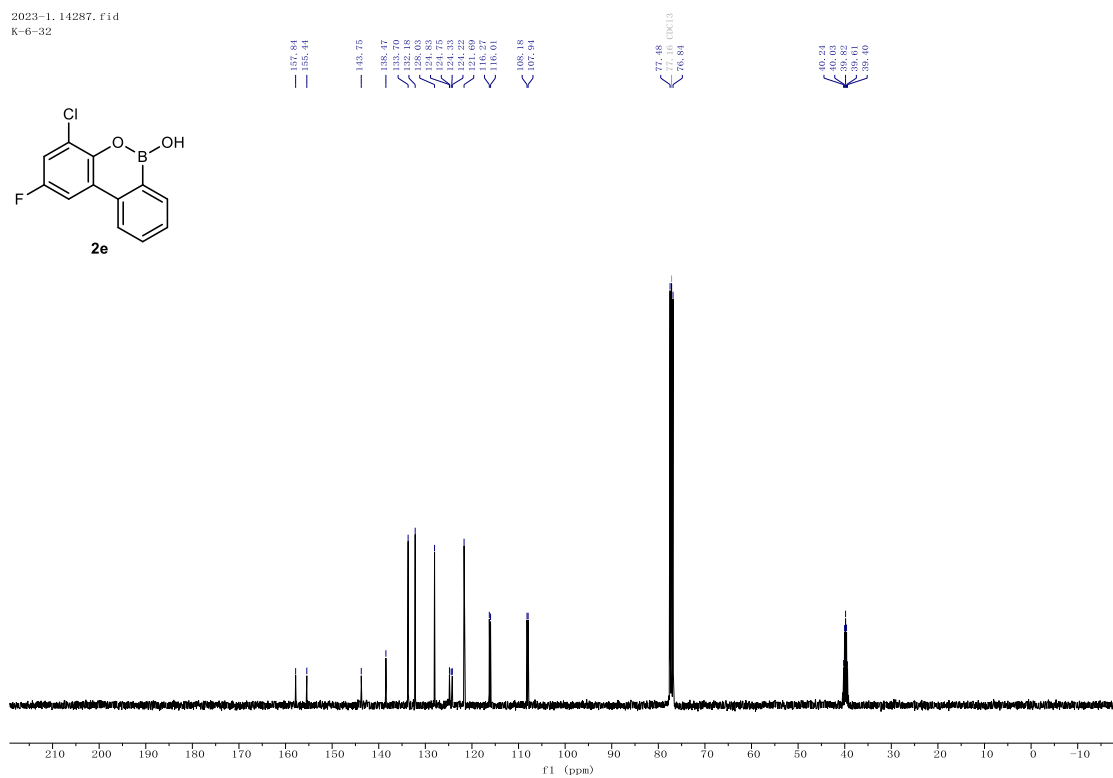

CHENZL-20240530-K-7-26\_10.fid

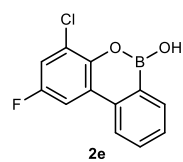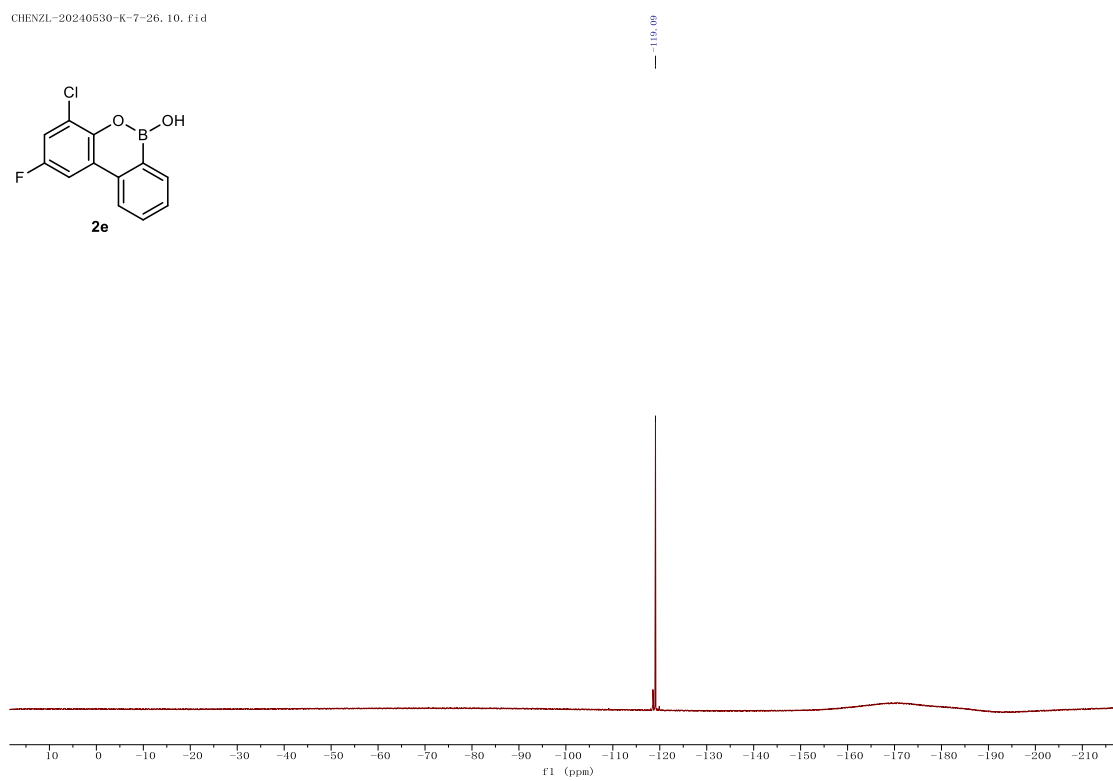

2024-1-10519.fid  
K 6-60

8.29  
8.25  
8.22  
8.18  
8.16  
8.14  
8.10  
7.75  
7.71  
7.62  
7.59  
7.50  
7.47  
7.45  
7.41  
7.40  
7.32  
7.29  
7.26

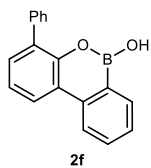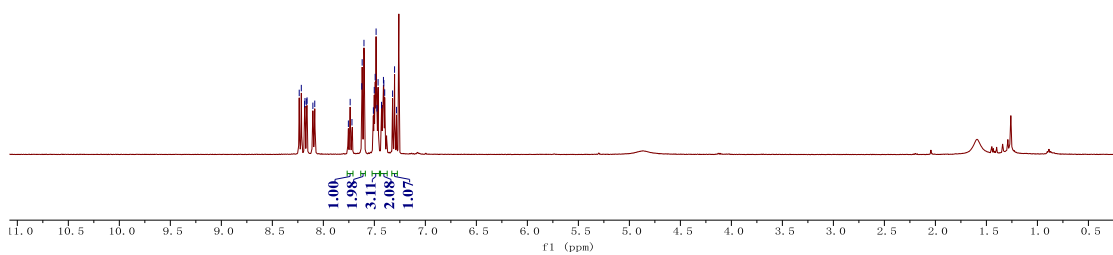

K-6-60.2.fid

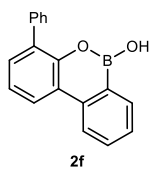

148.63  
148.63  
138.83  
132.72  
132.68  
129.83  
128.26  
127.85  
123.45  
122.84  
122.04

77.06 (CDCl3)

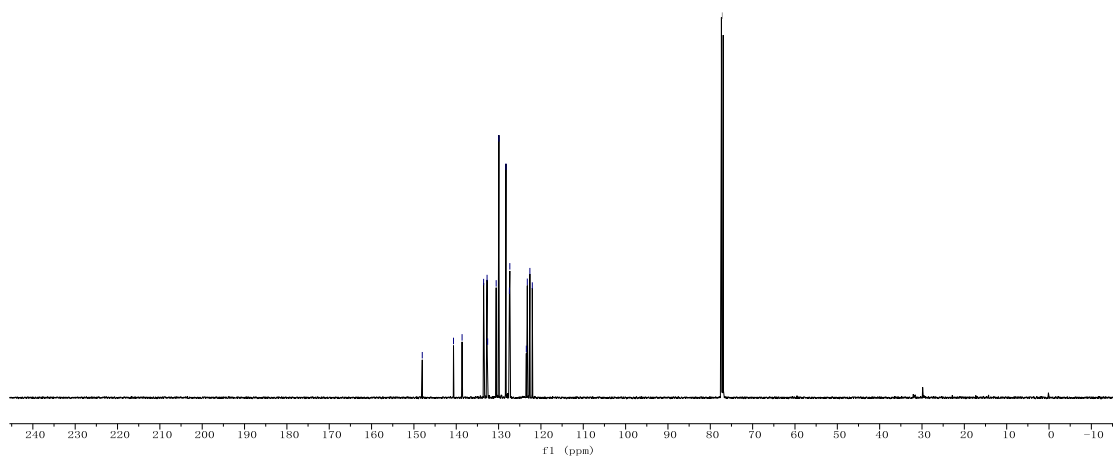

2024-1-10517.fid  
K 7-14

8.79  
8.58  
8.56  
8.19  
8.17  
8.02  
8.01  
7.81  
7.79  
7.78  
7.74  
7.59  
7.56  
7.52  
7.50  
7.49  
7.45  
7.43

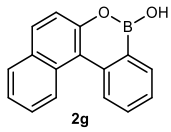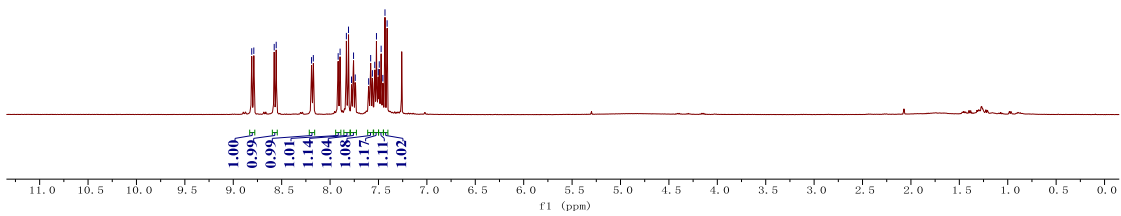

K-6-28.2.fid

149.56  
140.73  
133.22  
131.75  
130.79  
129.68  
127.27  
127.24  
126.51  
125.79  
125.03  
117.40

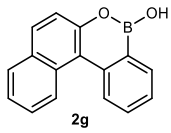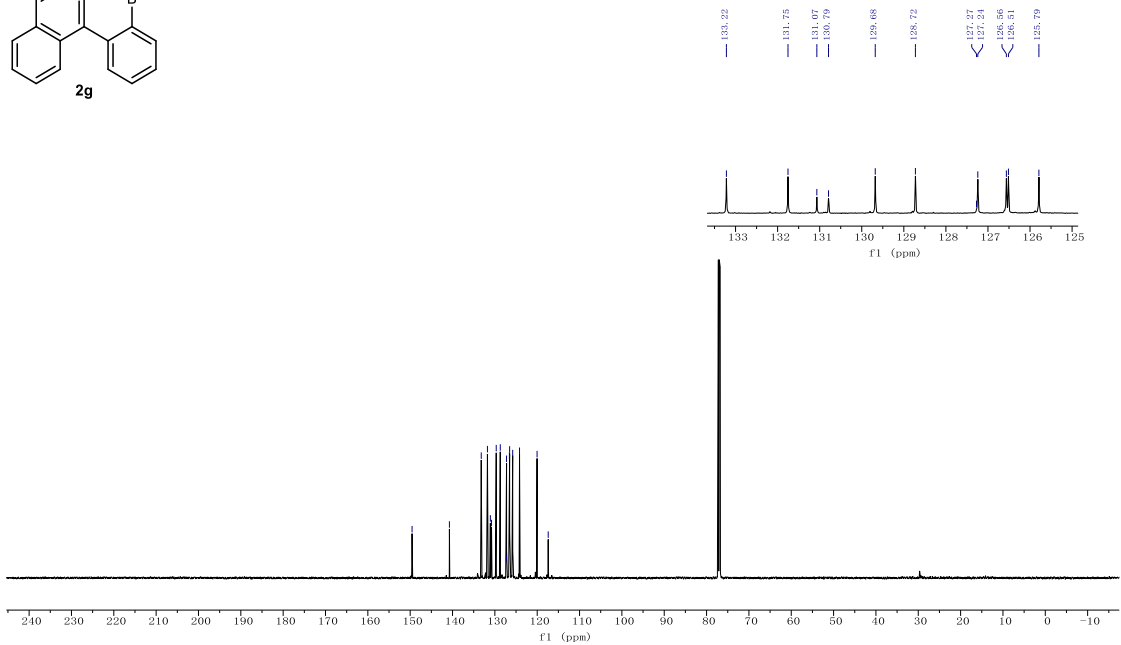

2023-1-14140.fid  
LJ-2-120

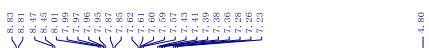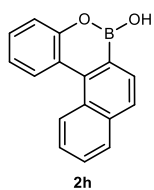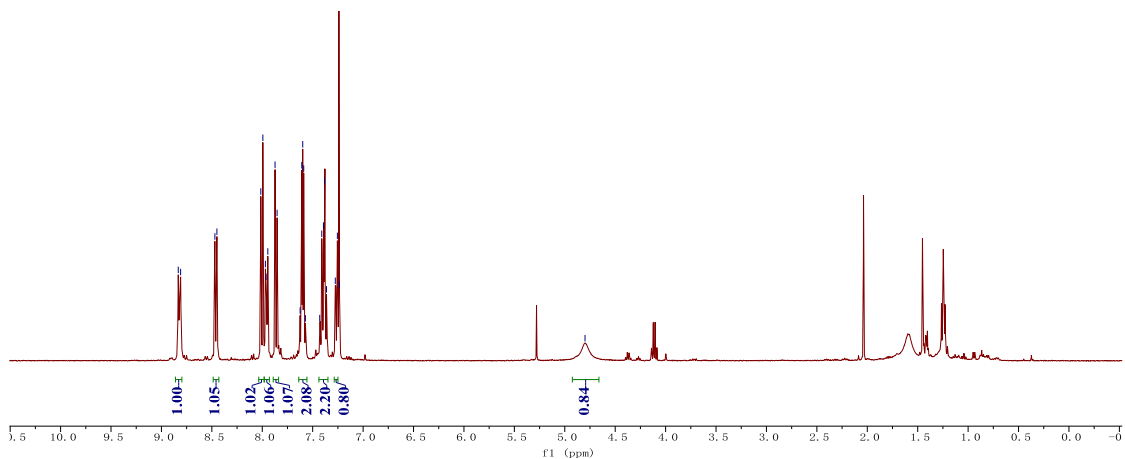

2023-1-14930.fid  
LJ-2-120

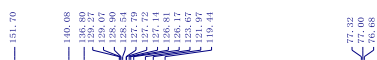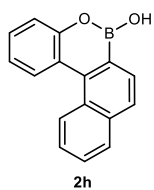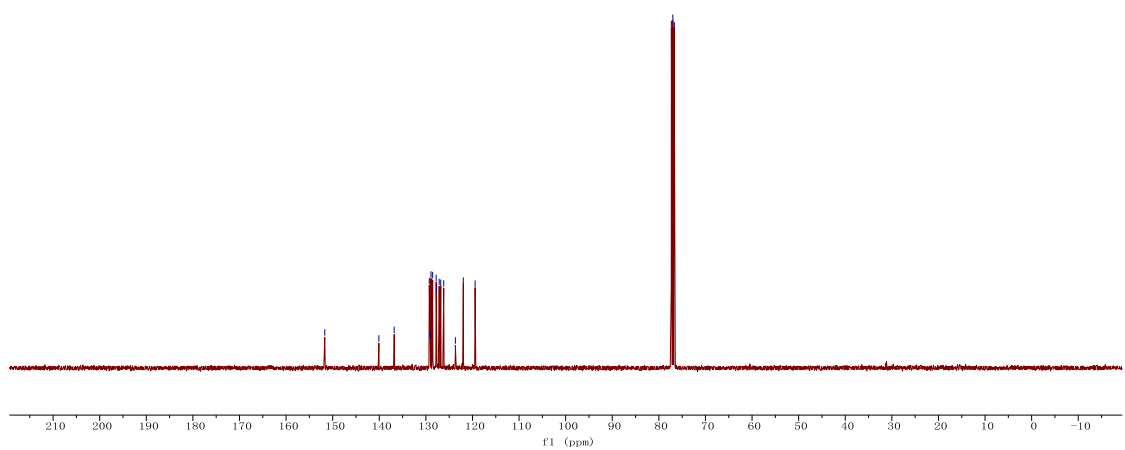



2024-1-10516.fid  
K 7-54

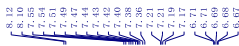

8.77

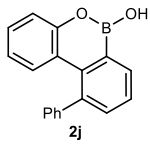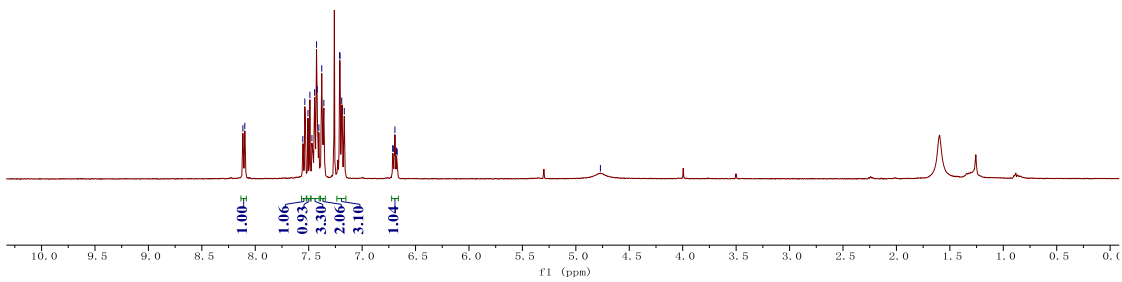

2023-1-15338.fid  
K-6-68

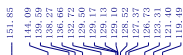

77.48  
77.16  
76.84

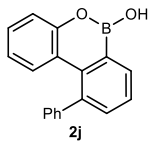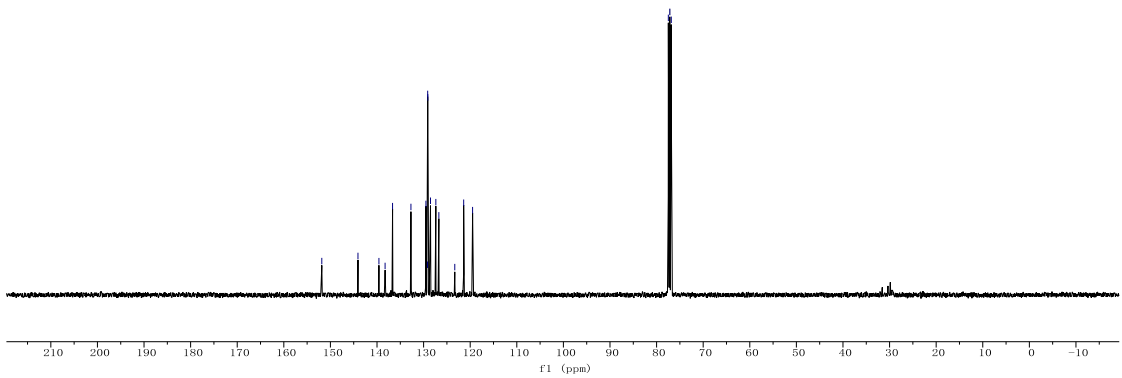







K-6-29.1.fid

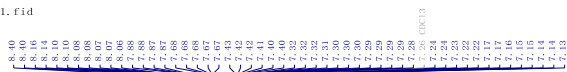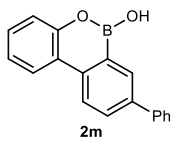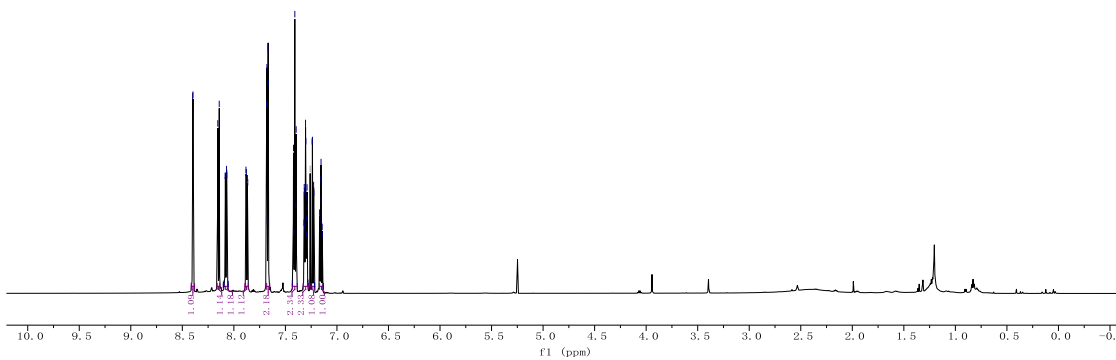

K-6-29.2.fid

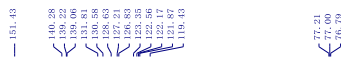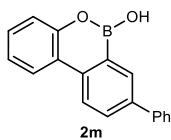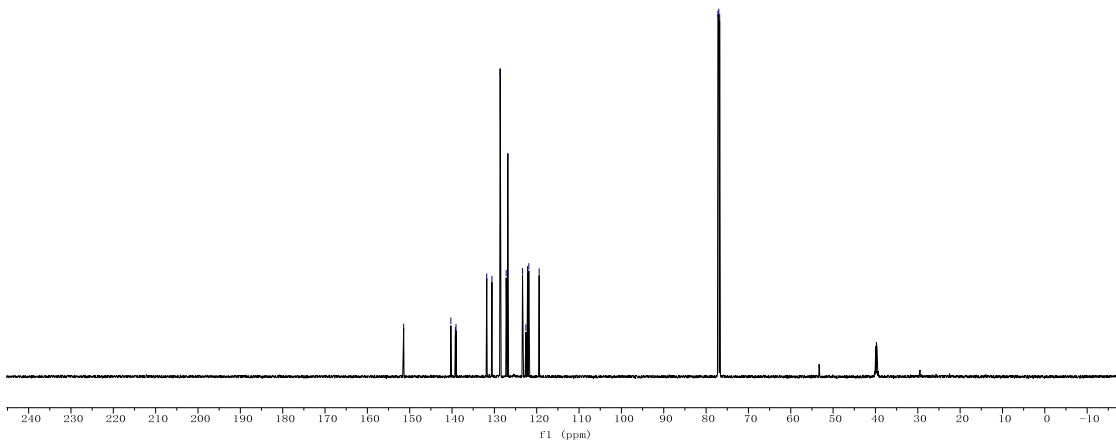

K-6-30.3.fid

8.69  
8.07  
7.72  
7.71  
7.52  
7.49  
7.32  
7.31  
7.29  
7.19

8.82

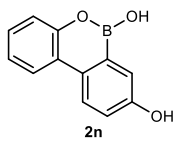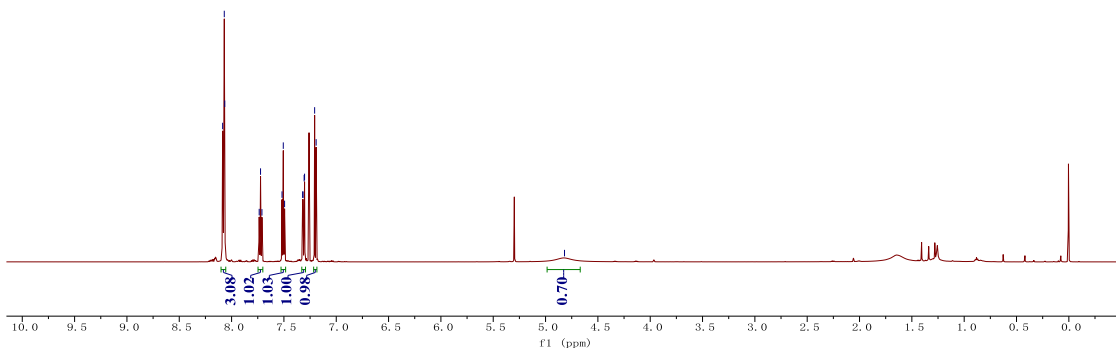

K-6-30.2.fid

149.89

138.74  
132.65  
128.26  
127.71  
124.10  
123.27  
120.69

77.71  
77.00  
76.79

39.87  
39.69  
36.35  
36.11

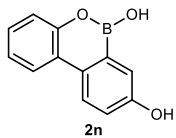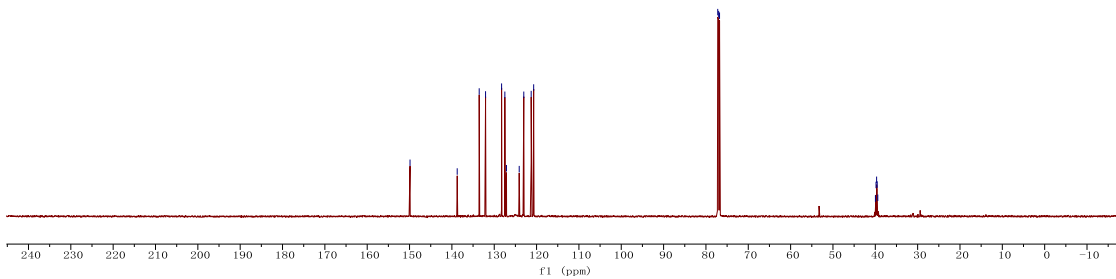



K-6-27.1.fid

7.76  
7.75  
7.47  
7.39  
7.39  
7.36  
7.34  
7.32  
7.31  
7.20

0.80

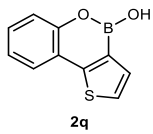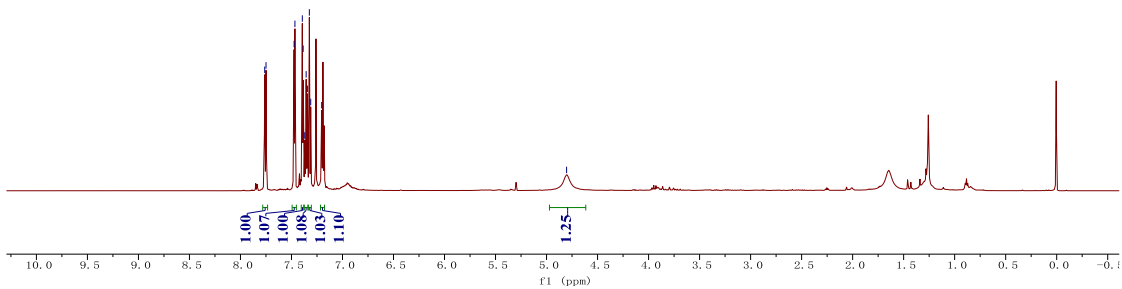

K-6-27.2.fid

153.72  
150.16

128.67  
128.65  
124.39  
121.34  
119.04

77.04  
77.00  
76.79

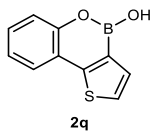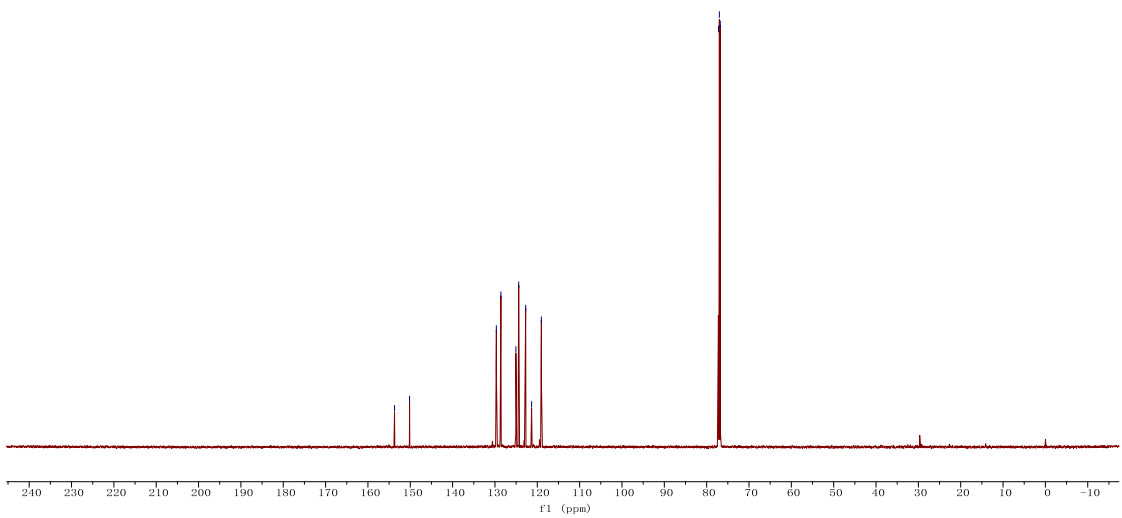

2024-1-10507.fid  
LJ-2-35-2

9.44

8.20  
8.10  
8.03

7.16  
7.10  
7.08

6.22

3.44

2.39

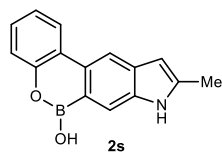

CDCl<sub>3</sub> + DMSO-D<sub>6</sub>

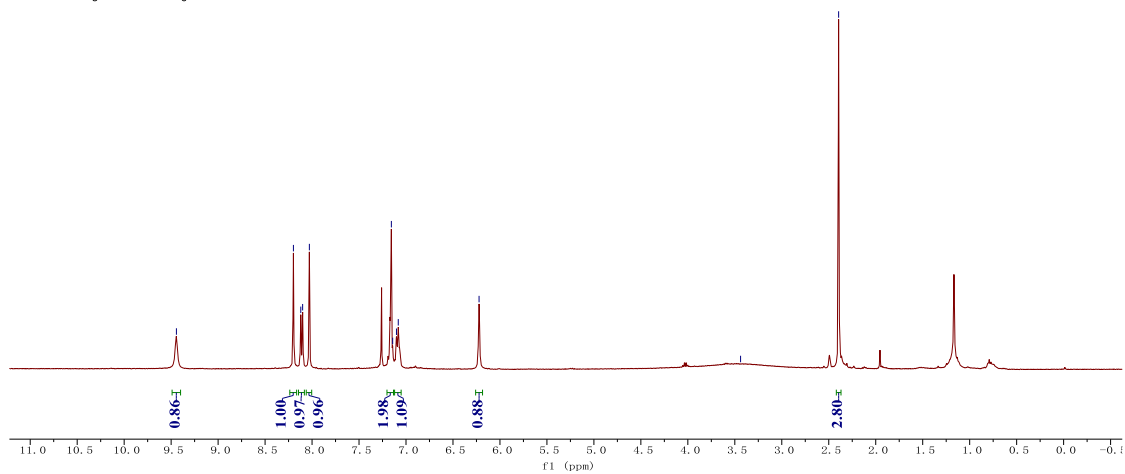

LJ-2-21-2.2.fid

150.54

138.99  
132.81  
130.95  
128.25  
127.78  
119.98  
117.20  
114.70

100.02

77.00  
76.79

39.92  
39.64  
39.50  
39.36

29.36

13.59

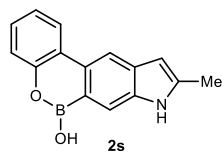

CDCl<sub>3</sub> + DMSO-D<sub>6</sub>

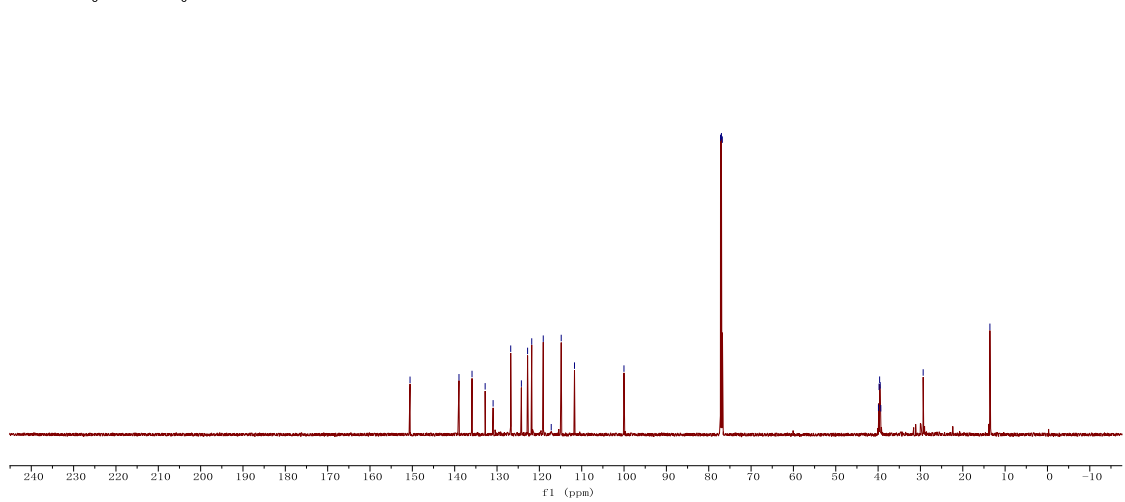

LJ-2-40.1.fid

8.54  
8.53  
8.14  
8.08  
7.91  
7.89  
7.39  
7.31  
7.31  
7.21  
7.19  
7.15  
7.13  
7.09  
7.06  
7.04  
7.03

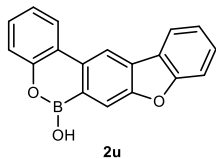

DMSO-D<sub>6</sub>+CDCl<sub>3</sub>

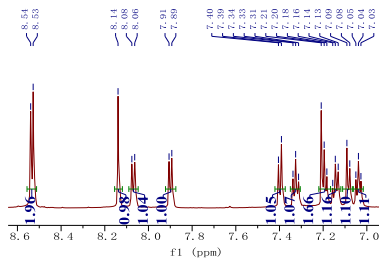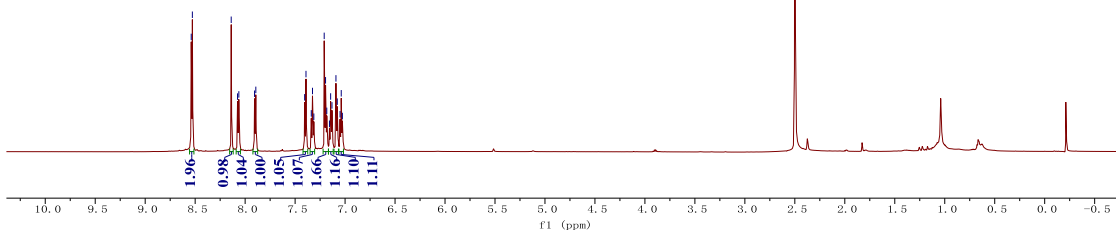

2023-1.14300.fid  
LJ 2-40

156.44  
154.30  
151.74  
134.08  
128.88  
127.43  
124.74  
123.30  
123.31  
122.45  
122.01  
115.10  
114.86  
111.88

40.13  
39.92  
39.70  
39.49  
38.87

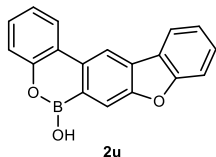

DMSO-D<sub>6</sub>+CDCl<sub>3</sub>

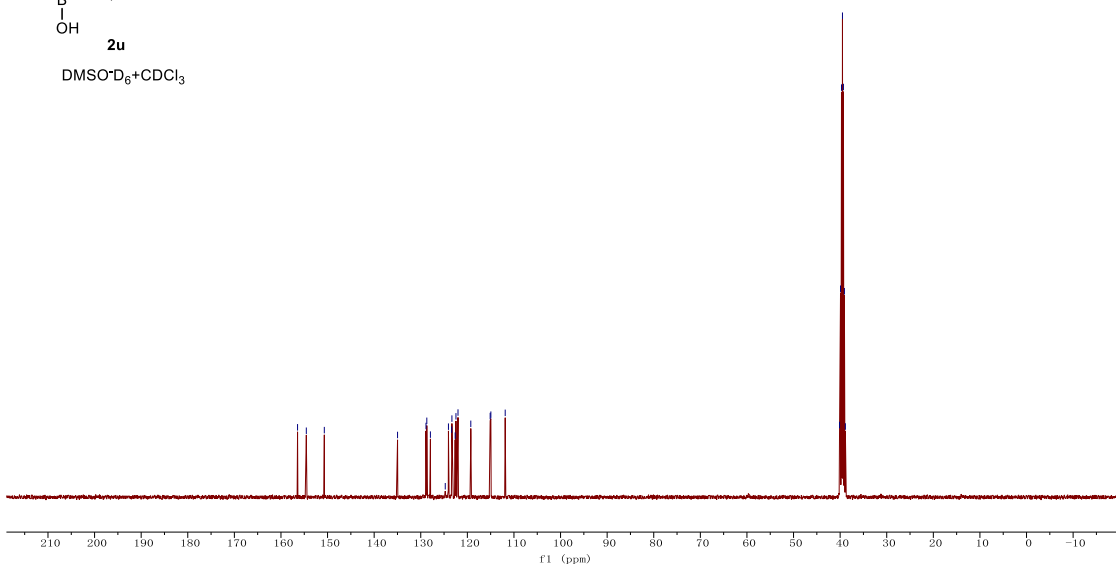



LJ-2-41-2, 1. fid

9.55  
9.37  
8.73  
8.66  
8.61  
8.06  
7.00  
7.43  
7.31  
7.30

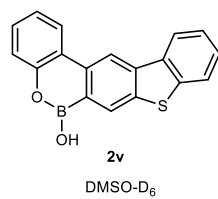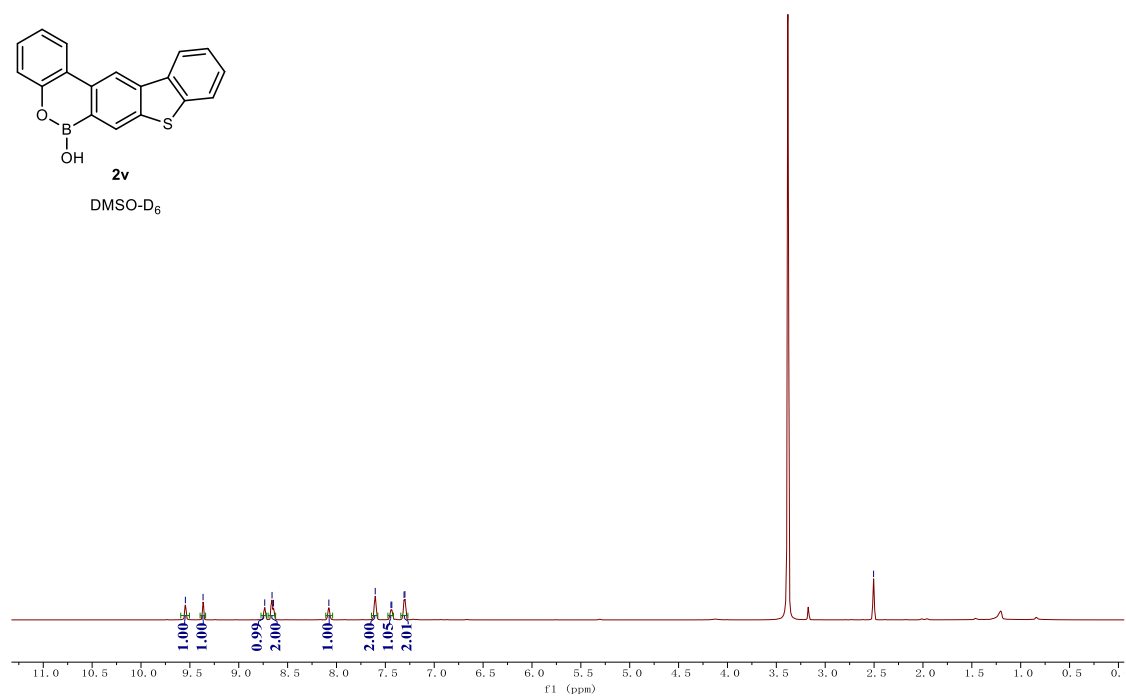

2023-1-14301.fid  
LJ 2-41-2

151.03  
139.71  
137.44  
136.16  
135.05  
128.12  
127.85  
124.34  
123.17  
122.66  
122.45  
115.51  
40.73  
39.42  
38.60  
30.98  
38.87

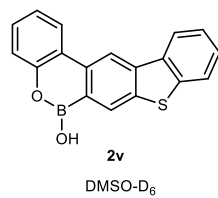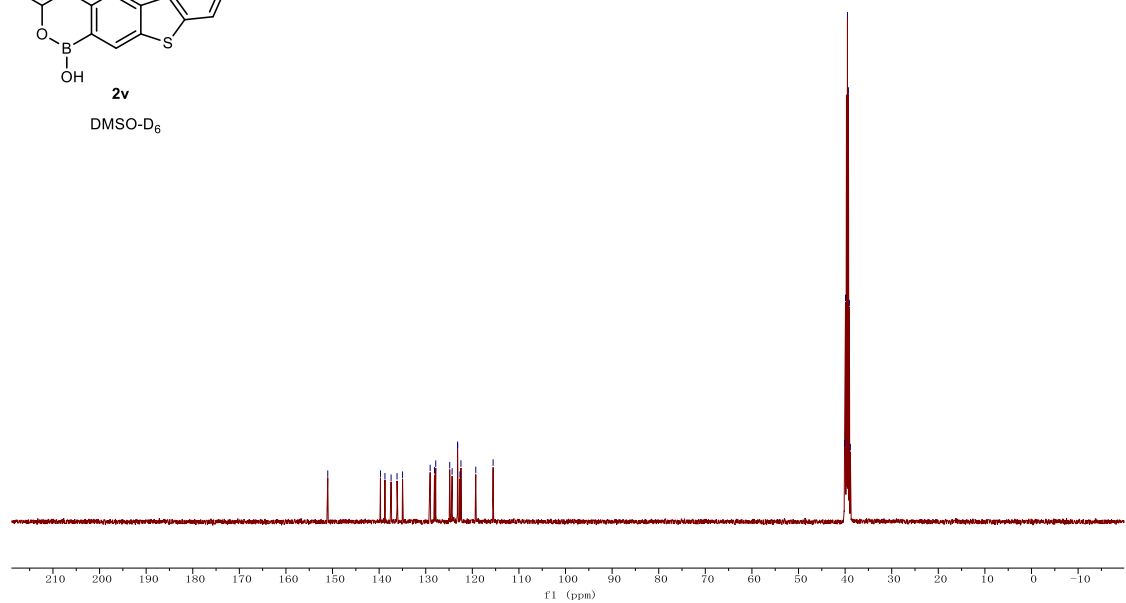

2023-1-15551.fid  
K-6-59

9.11  
8.77  
8.74  
8.72  
7.48  
7.45  
7.38  
7.27

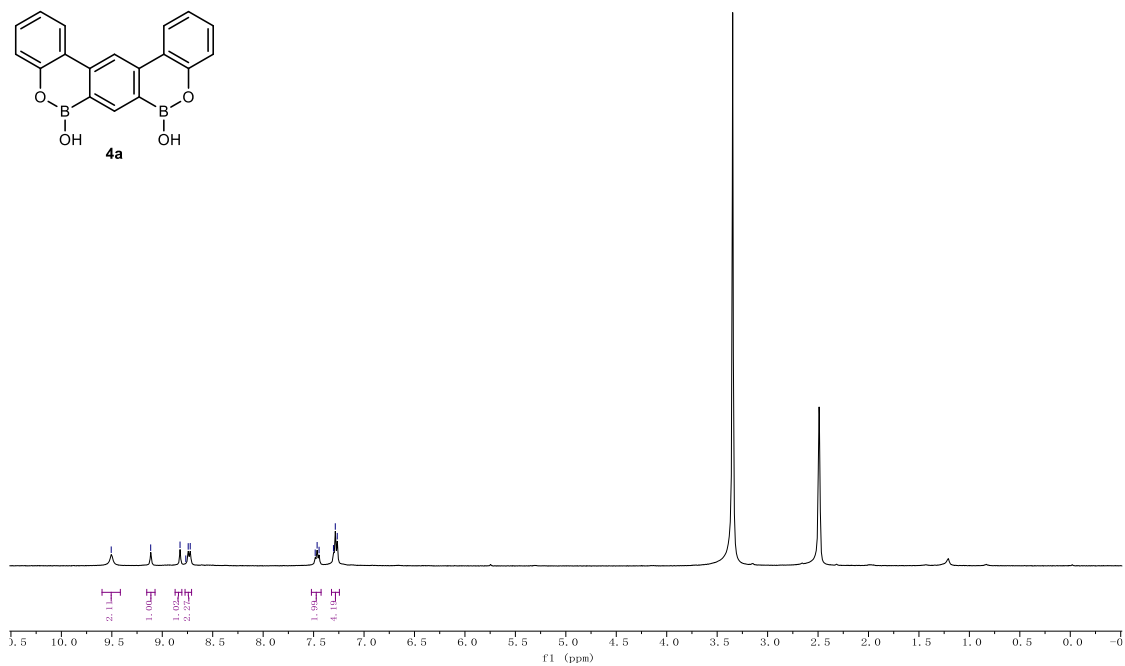

K-6-59.3.fid

152.33  
145.31  
140.76  
130.40  
127.57  
124.05  
122.94  
122.83  
119.81  
114.82  
49.05

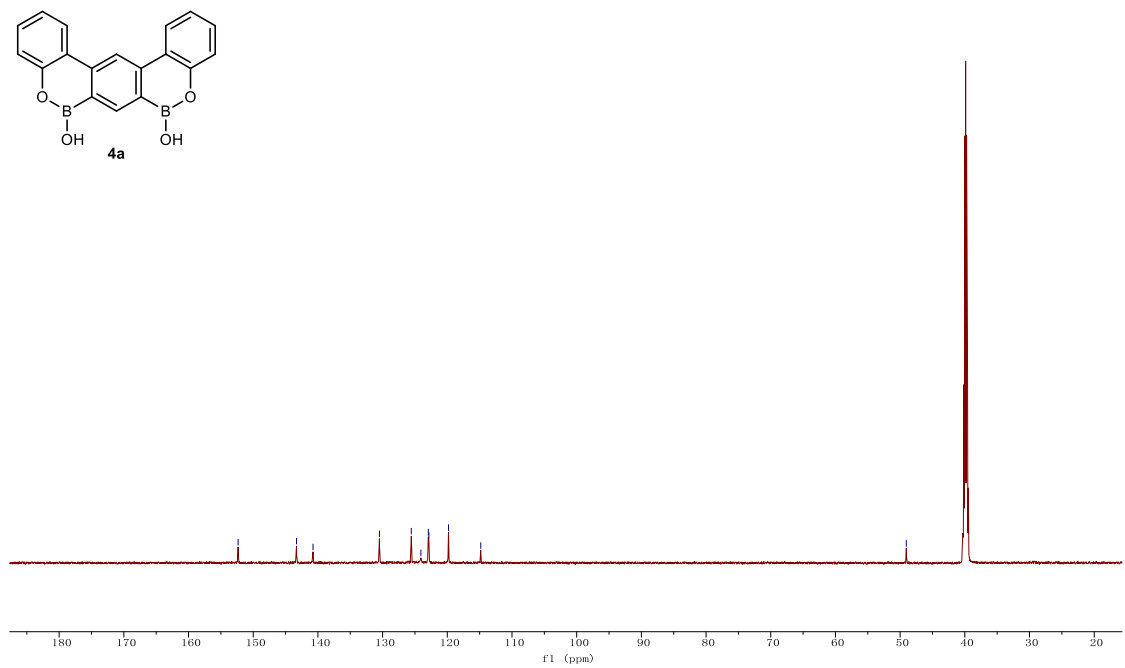

K-6-26(2)-(2).1.fid

8.39  
8.08  
8.07  
8.02  
7.99  
7.57  
7.53  
7.37  
7.36  
6.99  
6.97  
6.91  
6.90

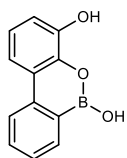

6a

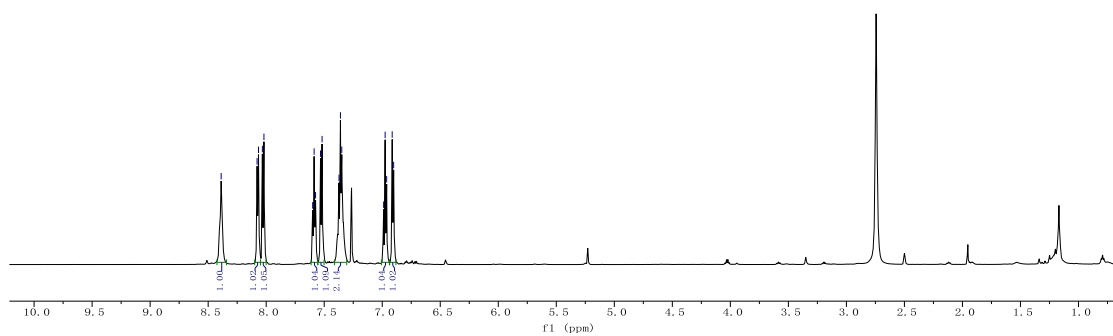

K-6-26(2)-(2).2.fid

146.14  
139.53  
139.13  
132.92  
132.20  
128.20  
122.44  
121.25  
121.04  
114.13  
113.27  
77.22  
77.00  
76.79  
39.28  
38.14  
39.00

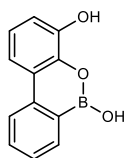

6a

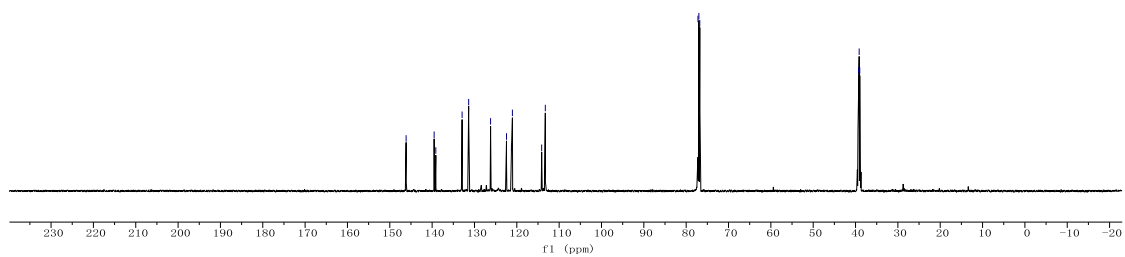

K-6-2. 1. fid

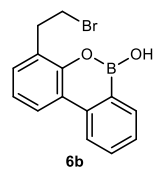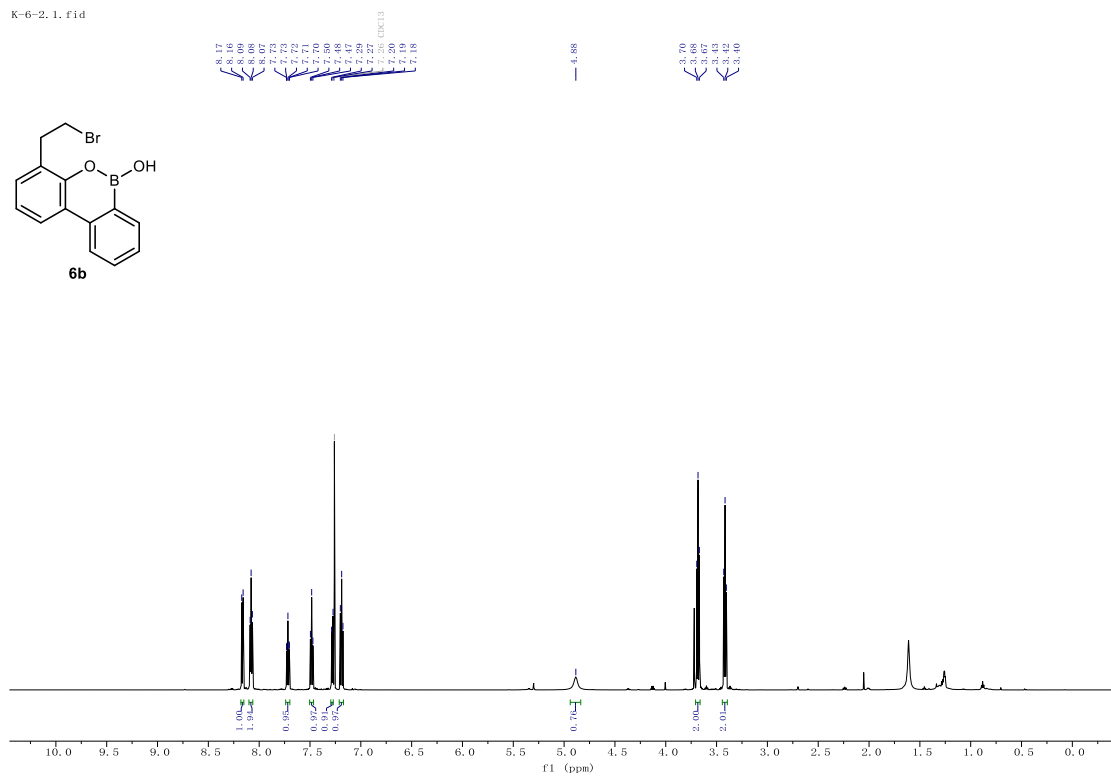

2023-1. 15339. fid  
K-6-2

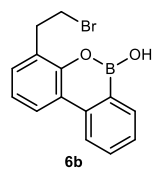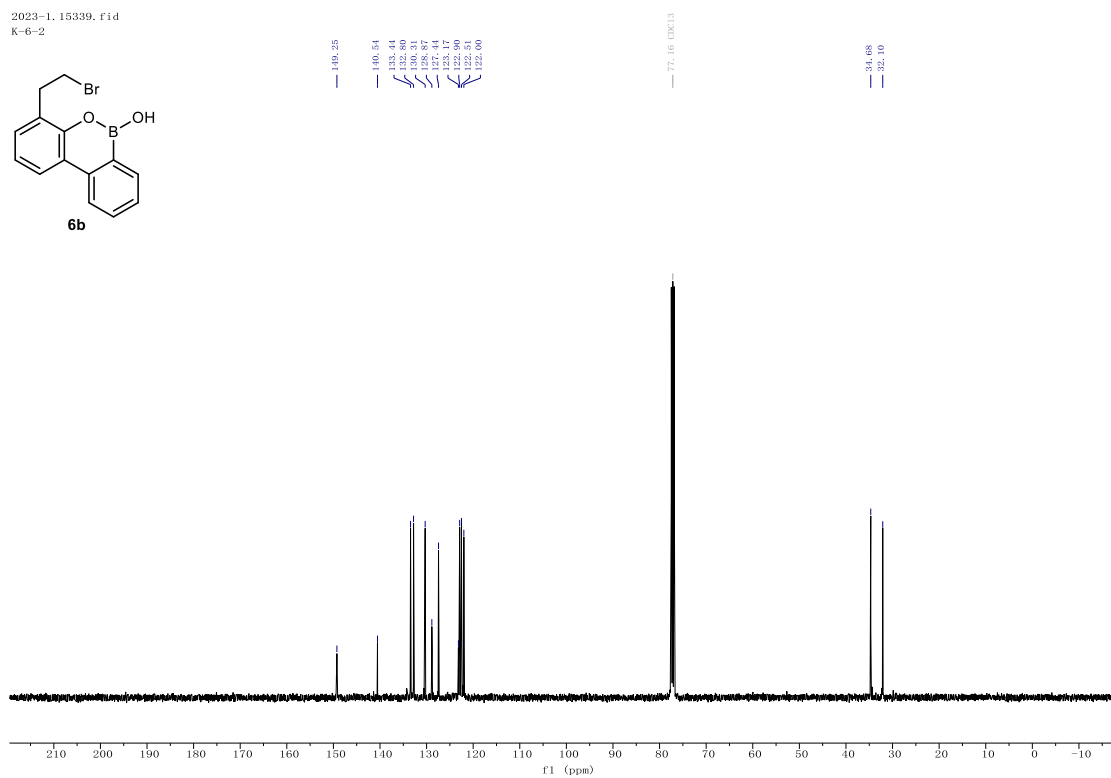

K-6-125.1.fid

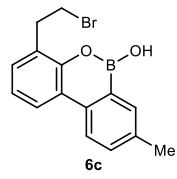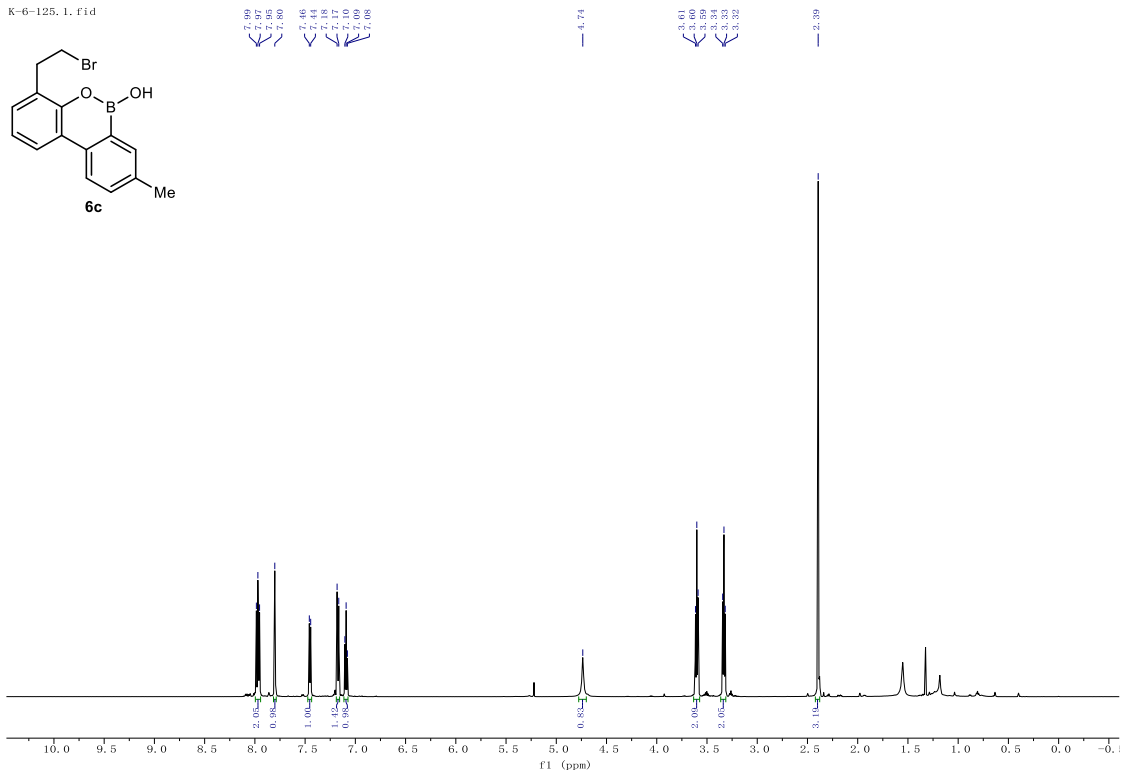

2023-1.16299.fid  
K-6-125

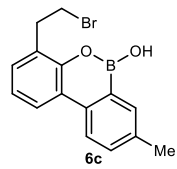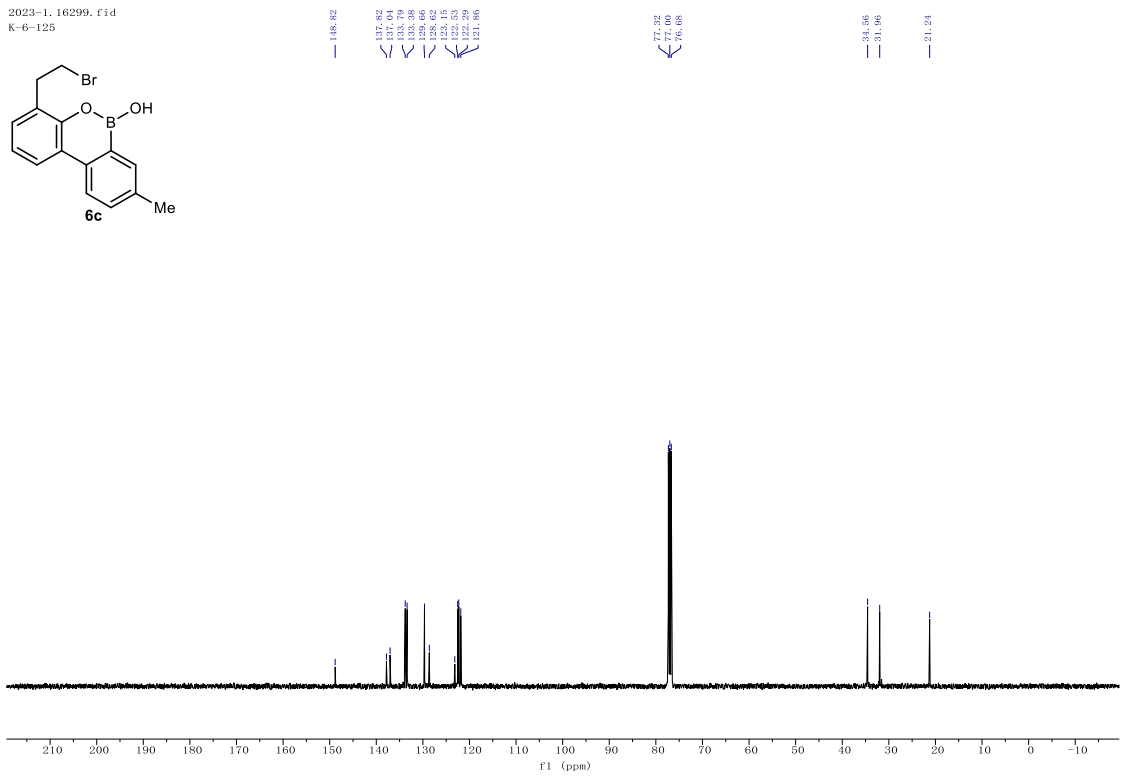

K-6-71.3.fid

7.77  
7.76  
7.76  
7.45  
7.43  
7.43  
7.42  
7.20  
7.19  
7.18  
7.08

3.14  
3.00

1.31

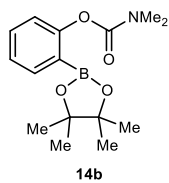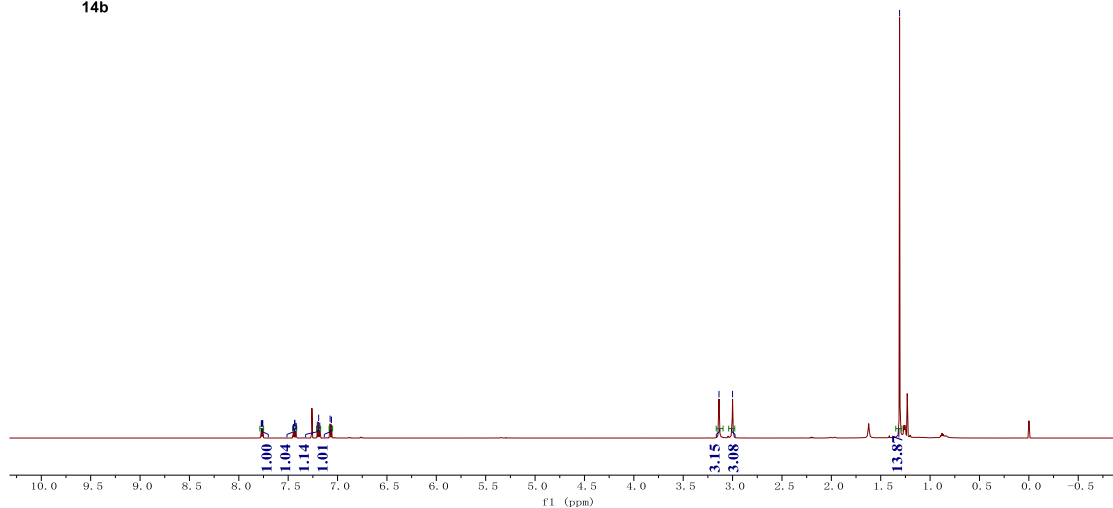

K-6-71.4.fid

156.36  
155.67  
136.20  
132.25  
127.89  
127.16  
115.34

85.49

36.67  
36.48  
24.94

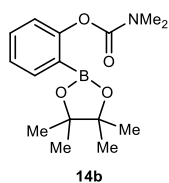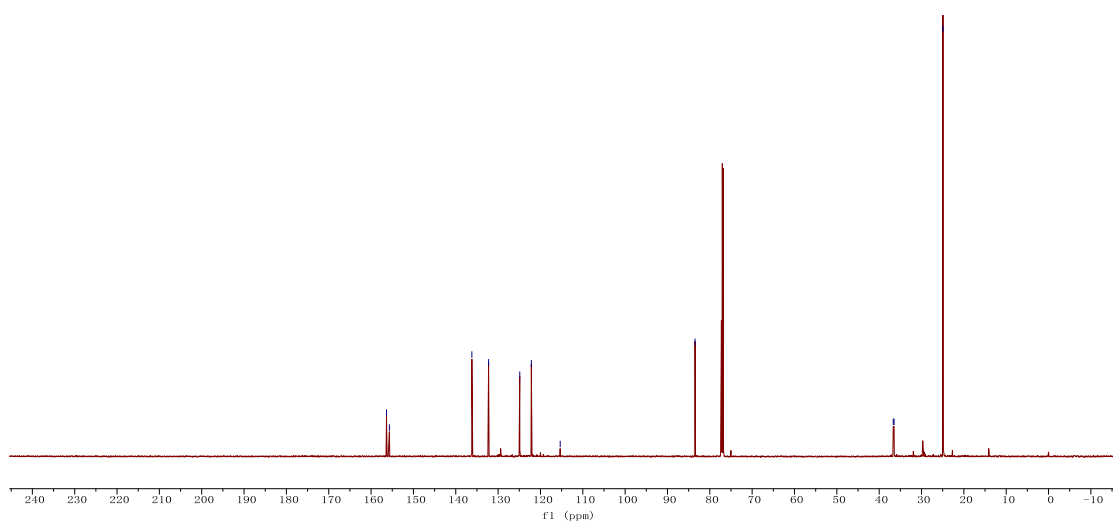

K-6-9-R2.1.fid

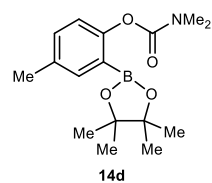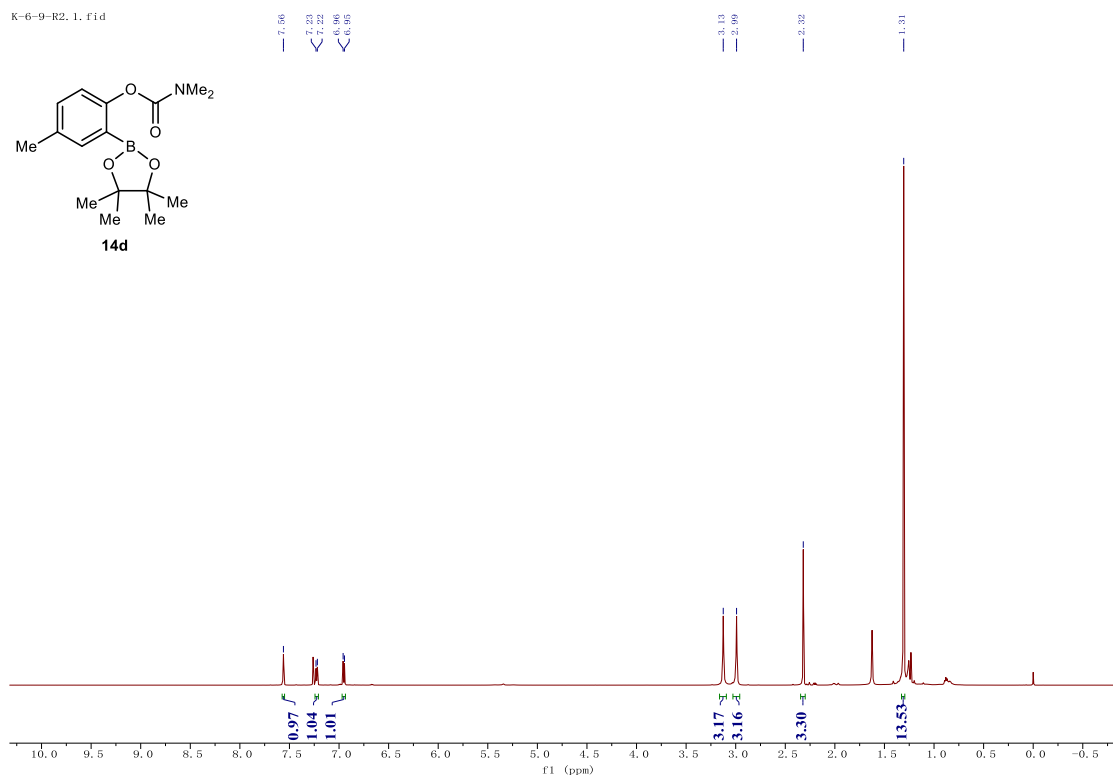

K-6-9-R2.2.fid

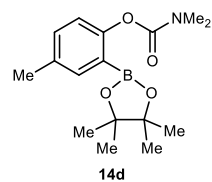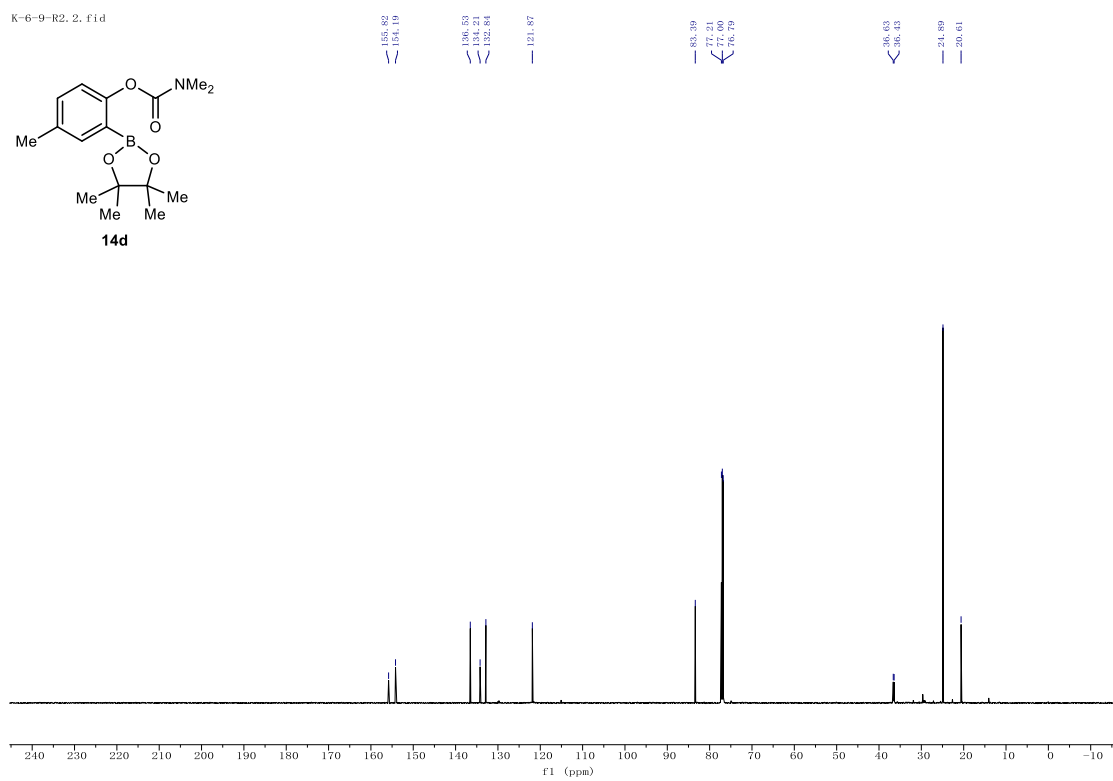

K-6-90.1.fid

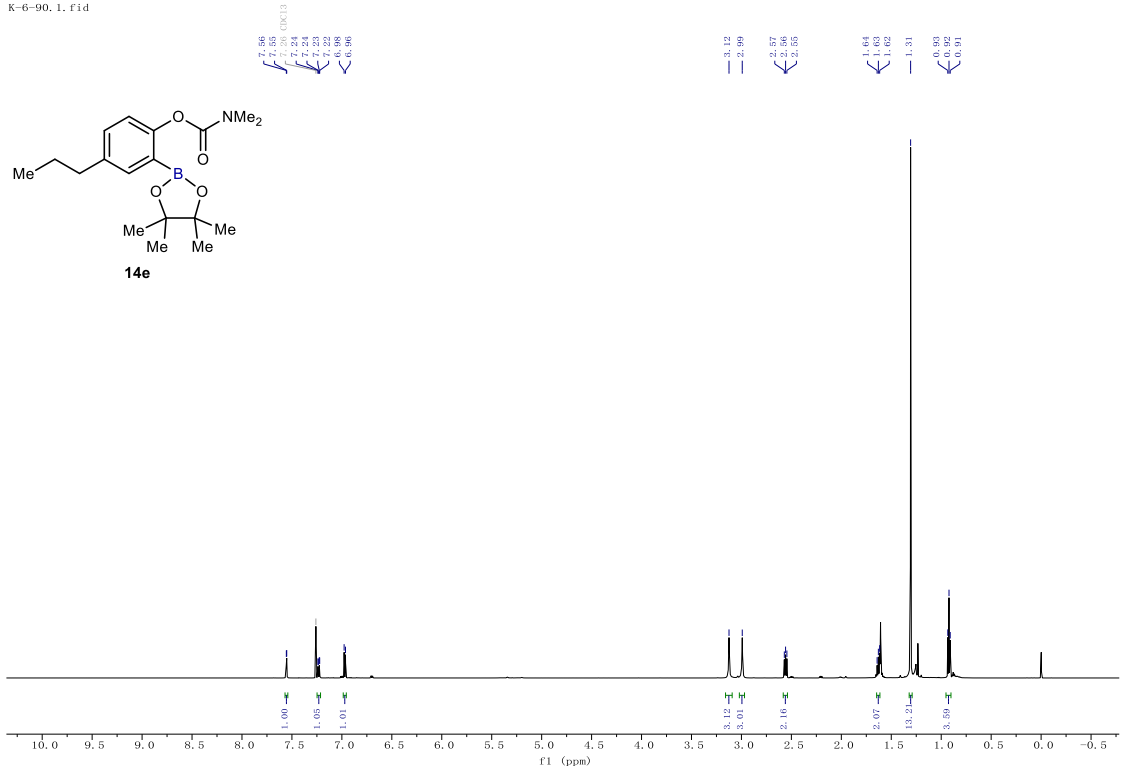

K-6-90.2.fid

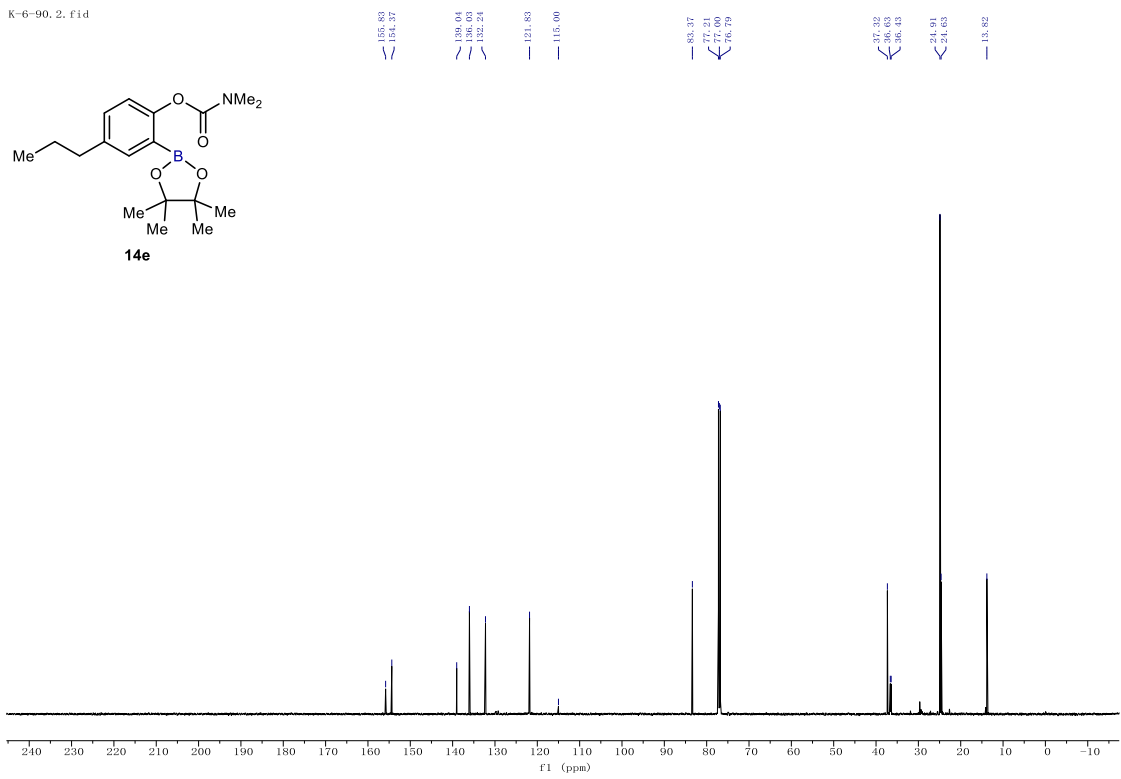





K-6-89. 1.fid

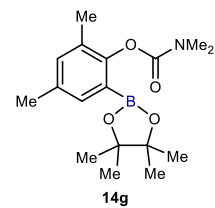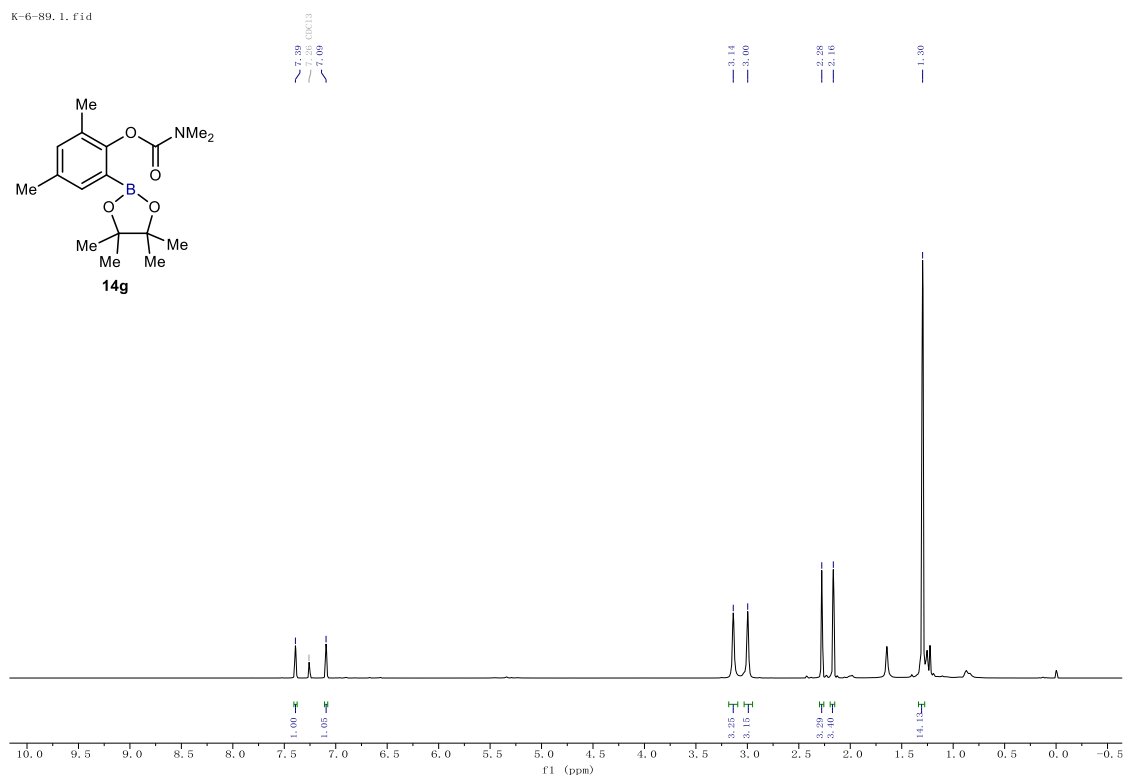

K-6-89. 2.fid

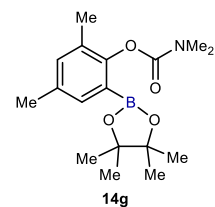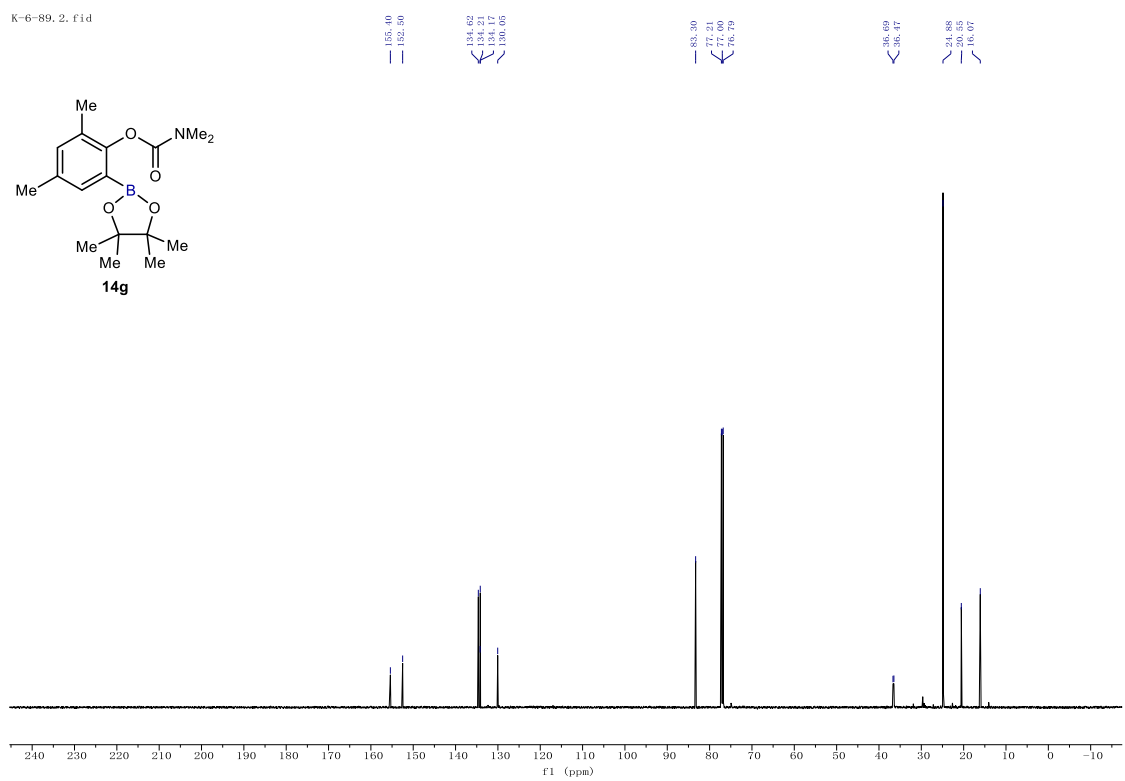

K-6-103. 1. f1.d

7.69  
7.68

7.18  
7.17  
7.11

3.12  
3.09

1.30

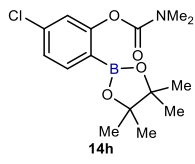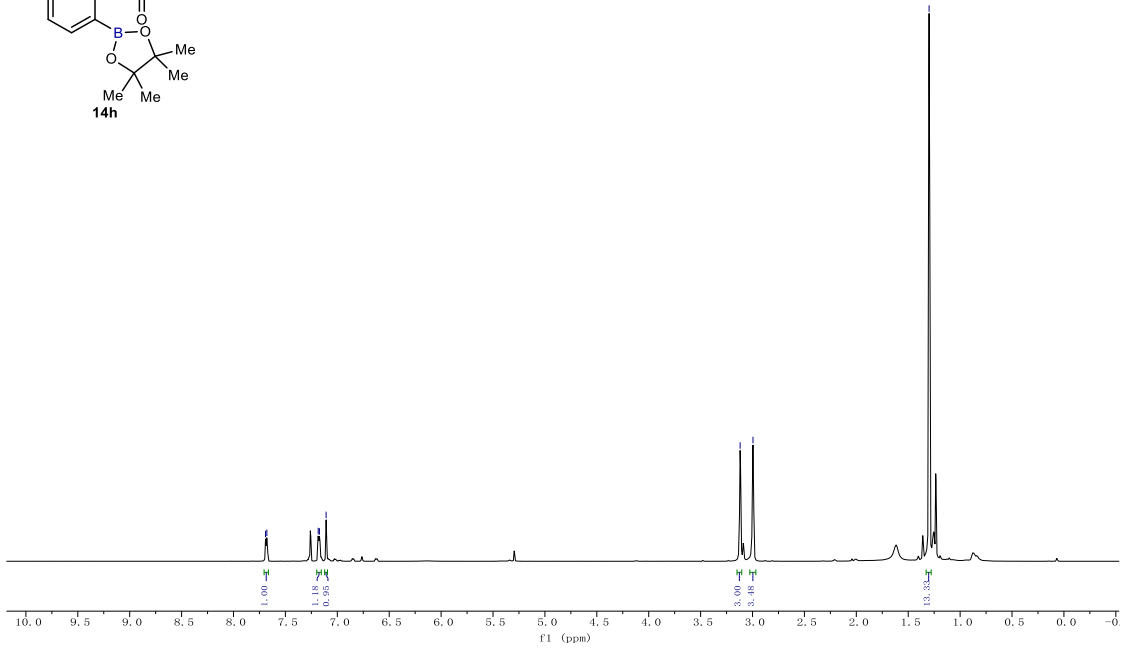

K-6-103. 2. f1.d

156.90

155.31

137.76

137.13

125.05

122.95

85.82

77.32

77.16

76.85 CDCl3

476.85

39.85

36.61

25.05

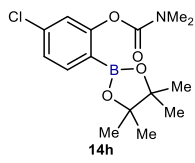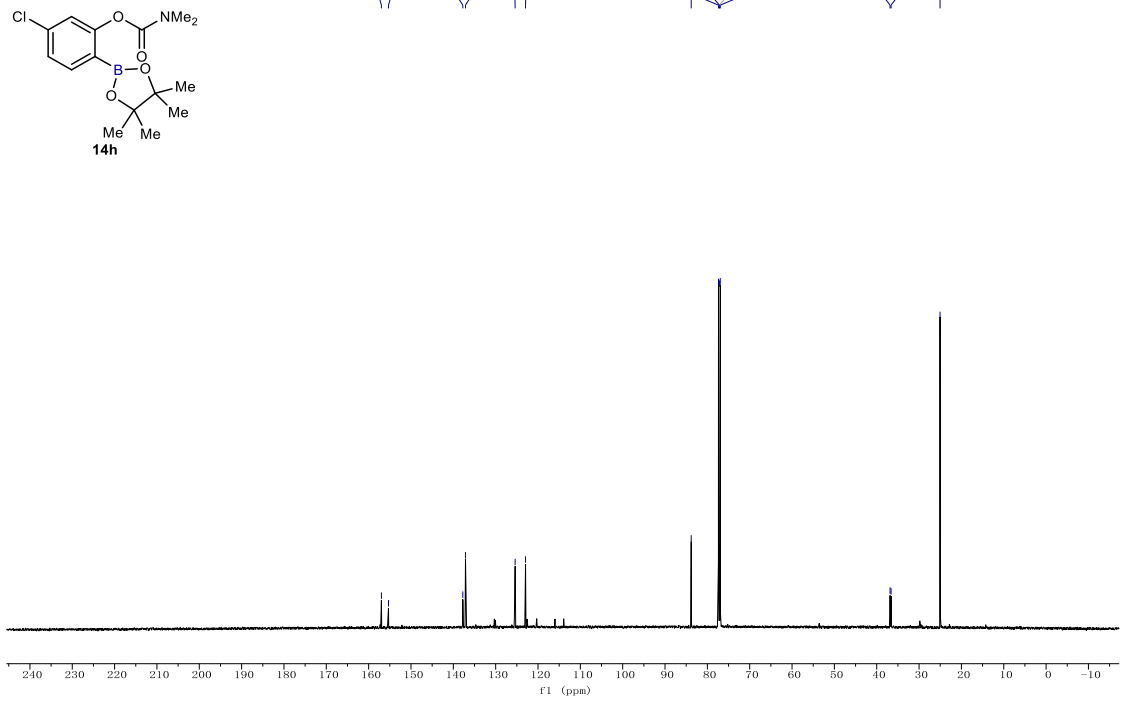

K-6-95.2.fid

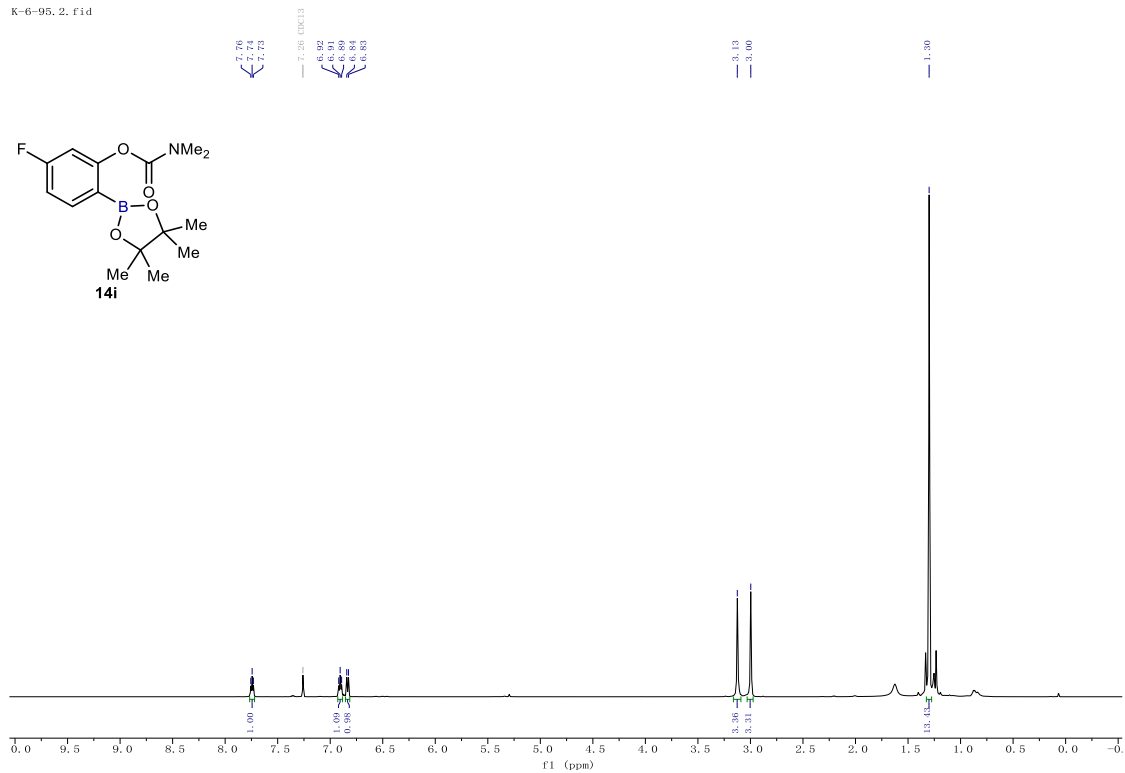

K-6-95.3.fid

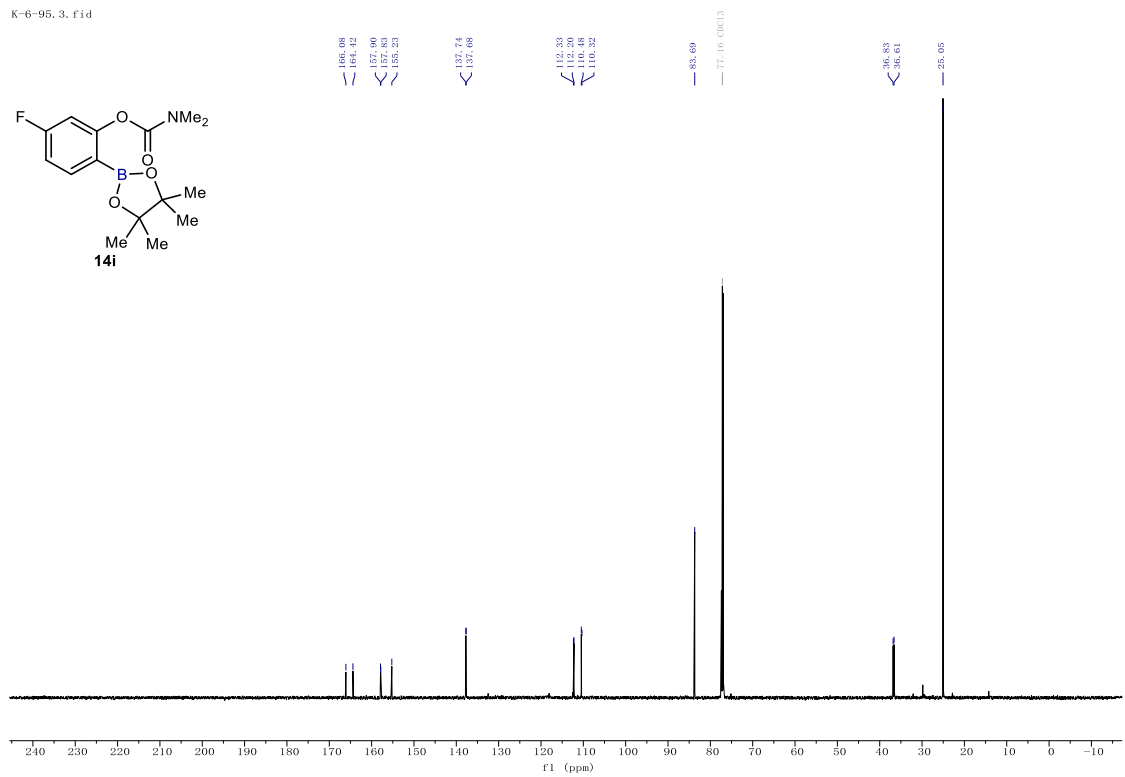

LJ-2-23-pure. 1. fid

8.00  
7.99  
7.98  
7.96  
7.95  
7.93  
7.92  
7.91  
7.90

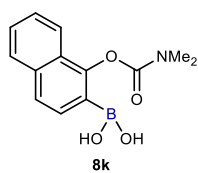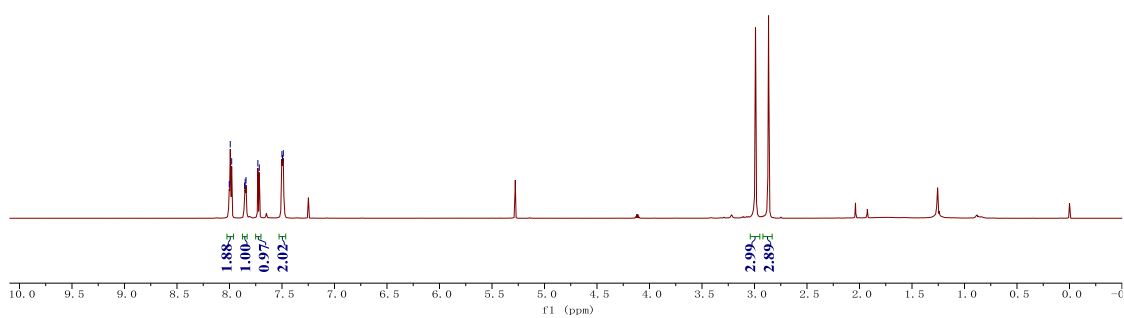

LJ-2-23-pure. 2. fid

156.04  
151.31  
133.45  
132.75  
132.70  
128.47  
128.39  
125.89  
124.58  
123.86  
121.30

77.00  
77.00  
76.79

36.61  
36.27

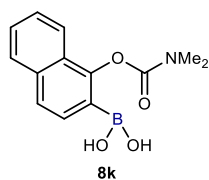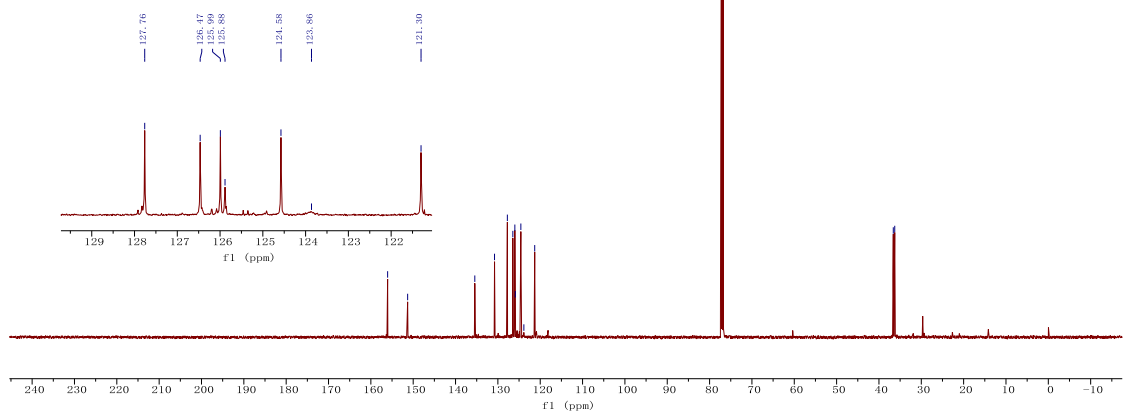

K-6-53(2). 1. fid

8.11  
7.92  
7.91  
7.69  
7.59  
7.59  
7.48  
7.47  
7.39  
7.32

2.96  
2.95

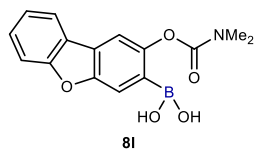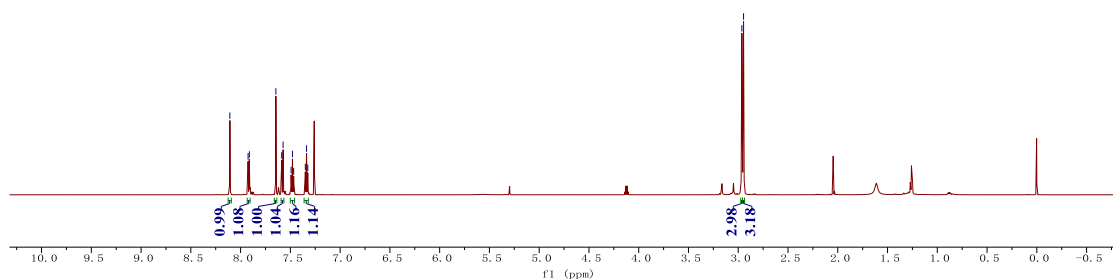

K-6-53(2). 2. fid

157.20  
153.80  
151.02

128.65  
128.04  
124.15  
120.93  
117.28  
111.55  
111.53

77.70  
76.79

36.63  
36.22

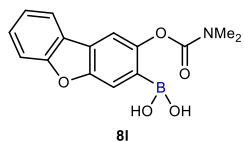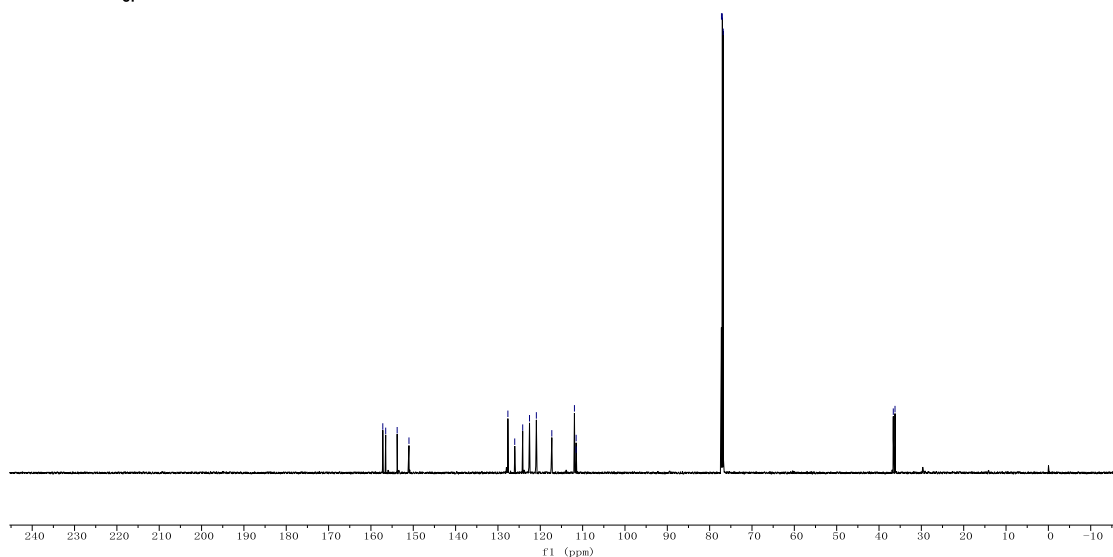

K-6-77.2.fid

7.84  
7.82  
7.81  
7.61  
7.59  
7.58  
7.48  
7.44  
7.42  
7.41  
7.36  
7.35  
7.35  
7.33  
7.33  
7.33  
7.32  
7.32

3.16  
3.02

1.33

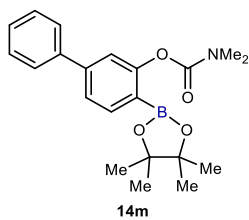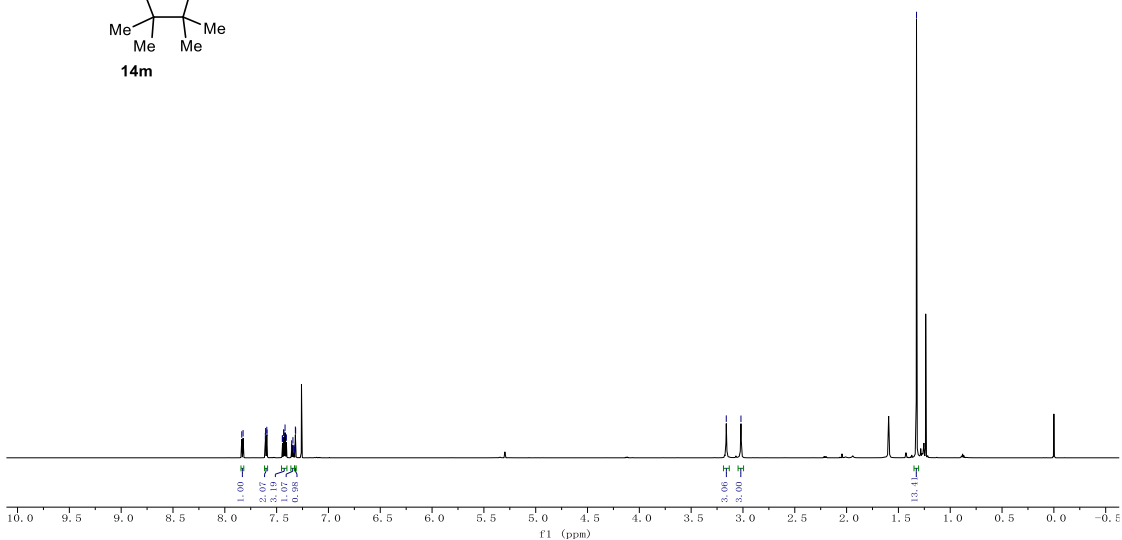

K-6-77.3.fid

156.79  
155.62  
143.29  
140.15  
136.99  
128.60  
127.72  
125.57  
120.78

83.47

36.67  
36.49

24.91

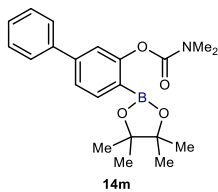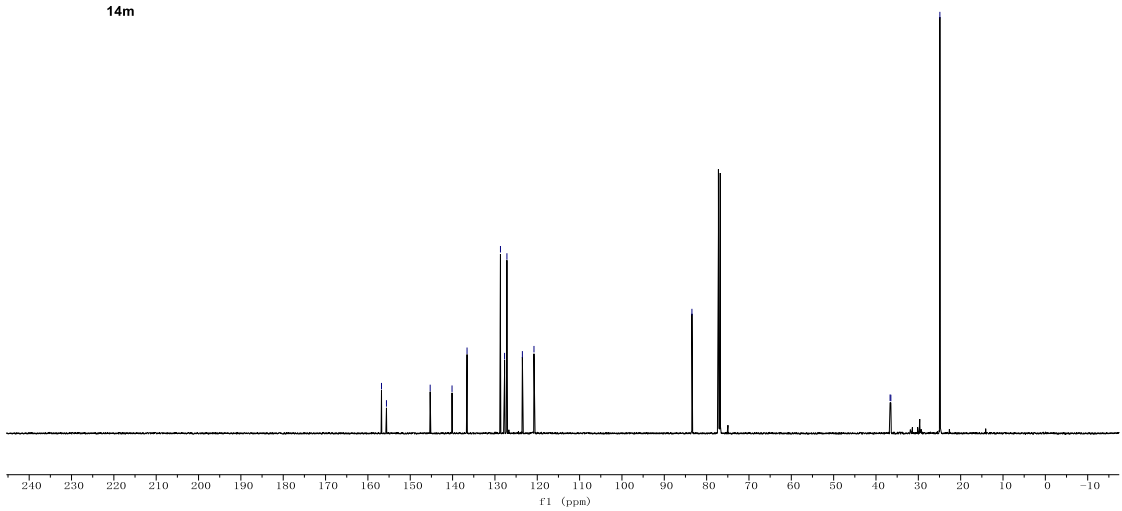

K-6-78(2). 1. fid

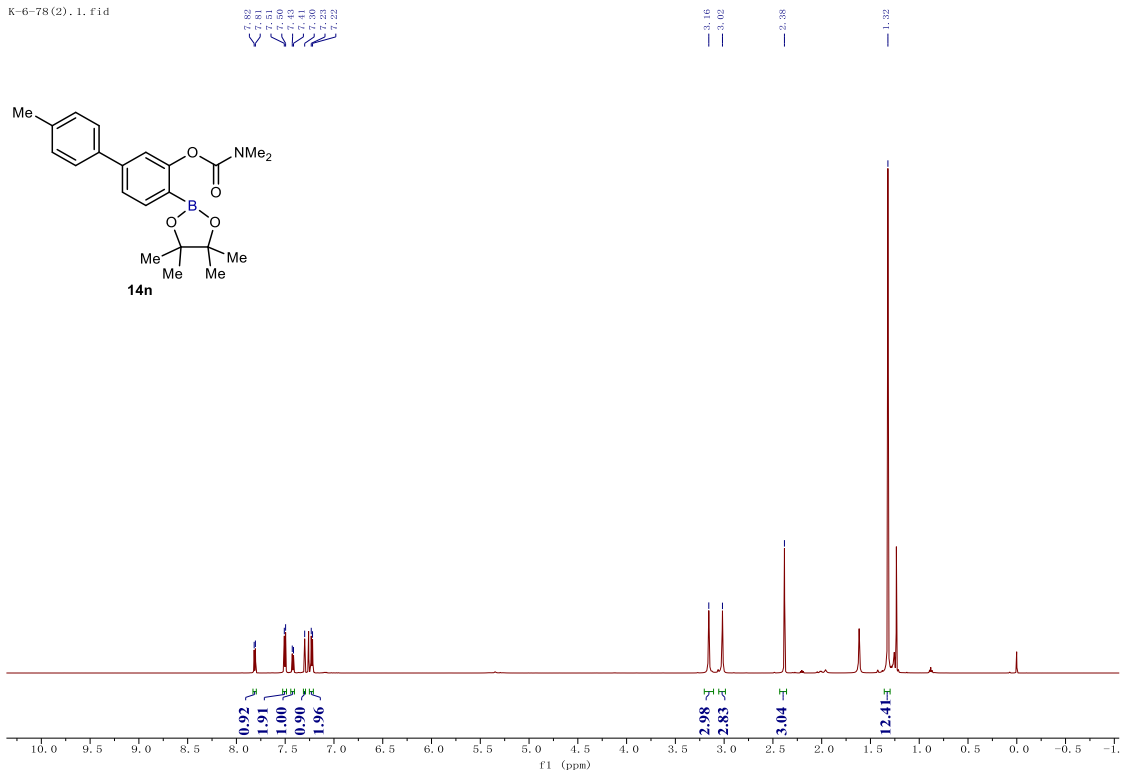

K-6-78(2). 2. fid

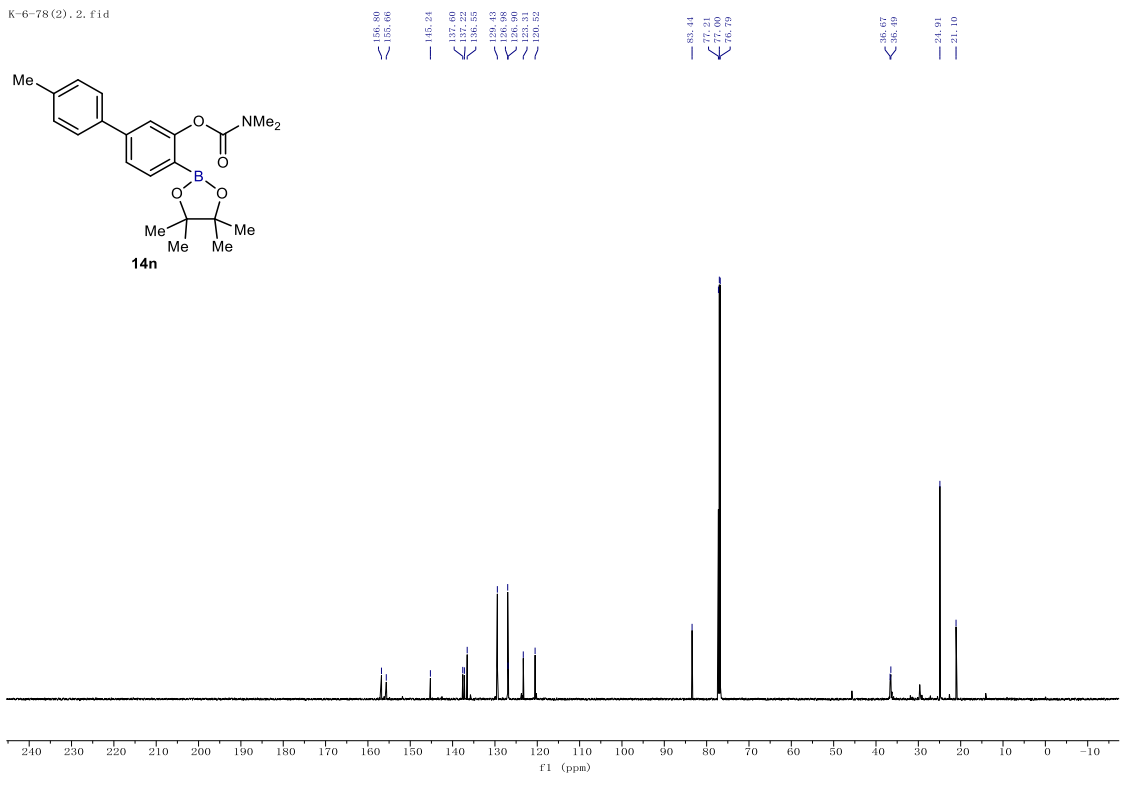



2023-1-15047.fid  
K-6-118

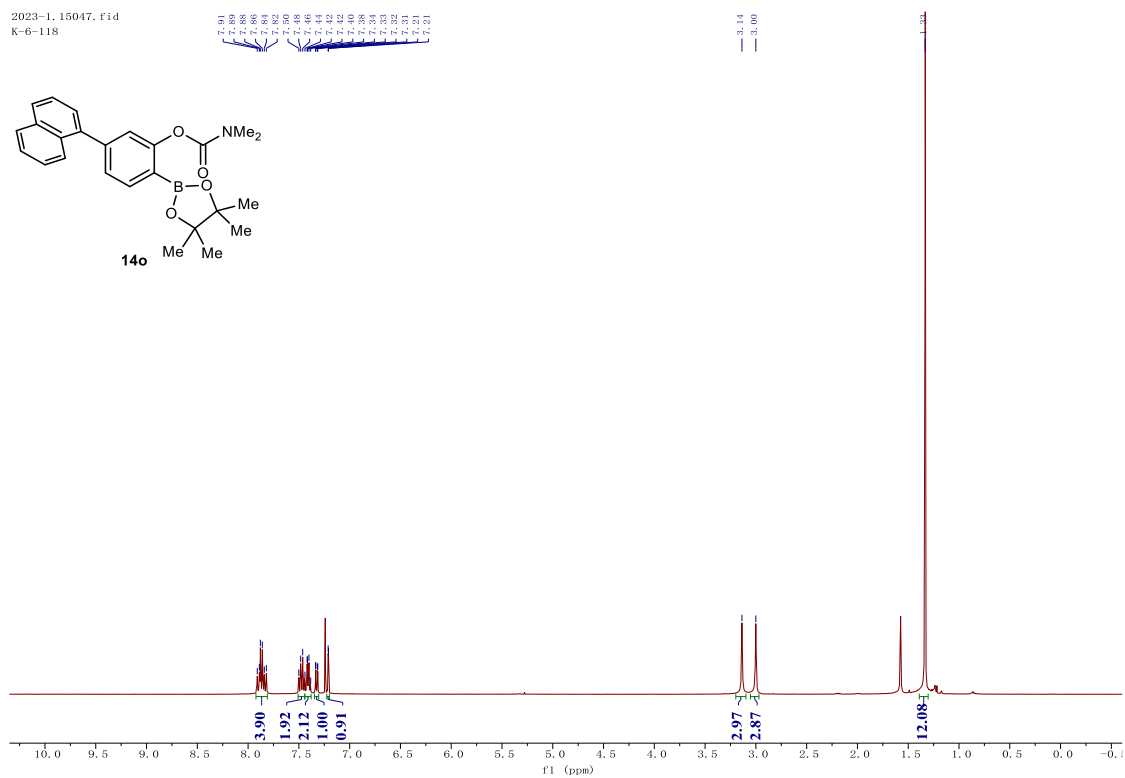

2023-1-15349.fid  
K-6-118

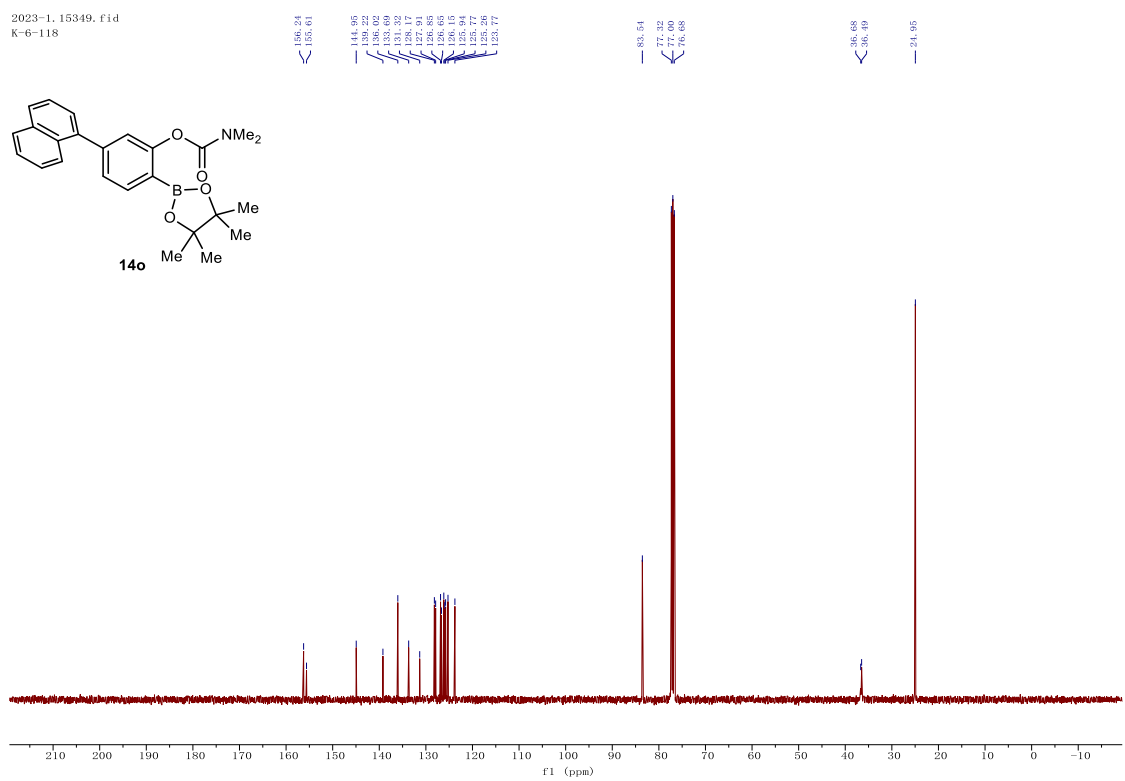

K-6-77.2.fid

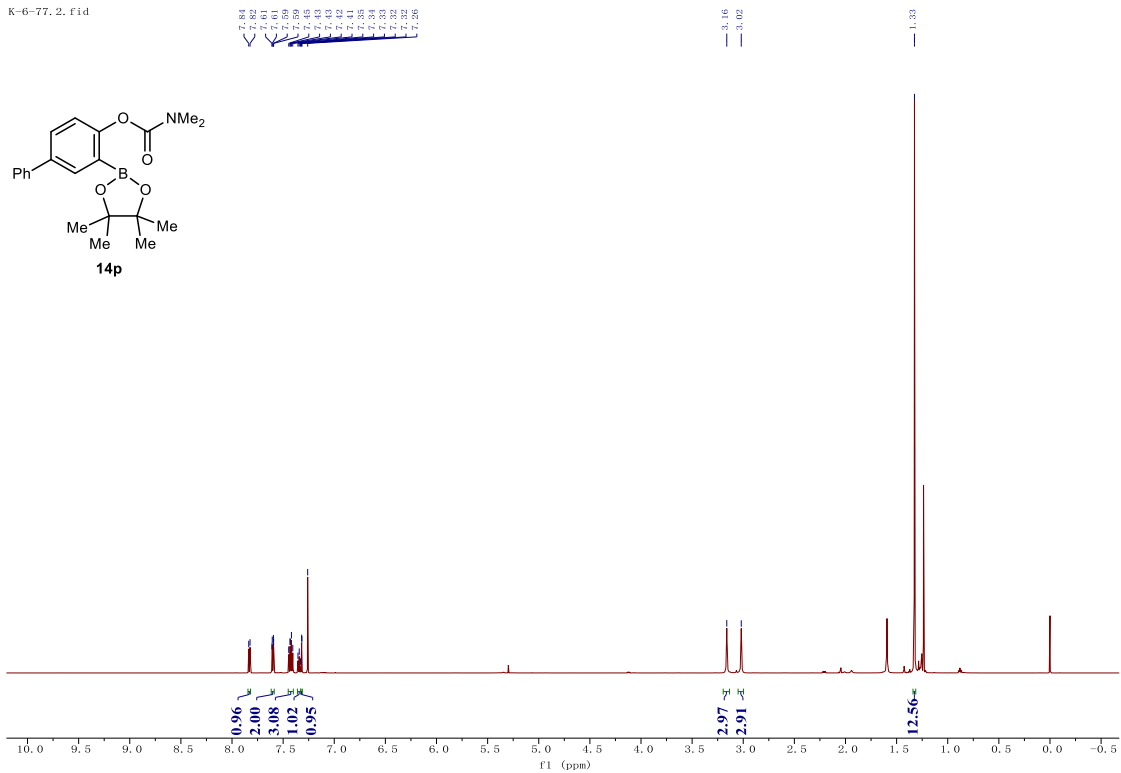

K-6-92.4.fid

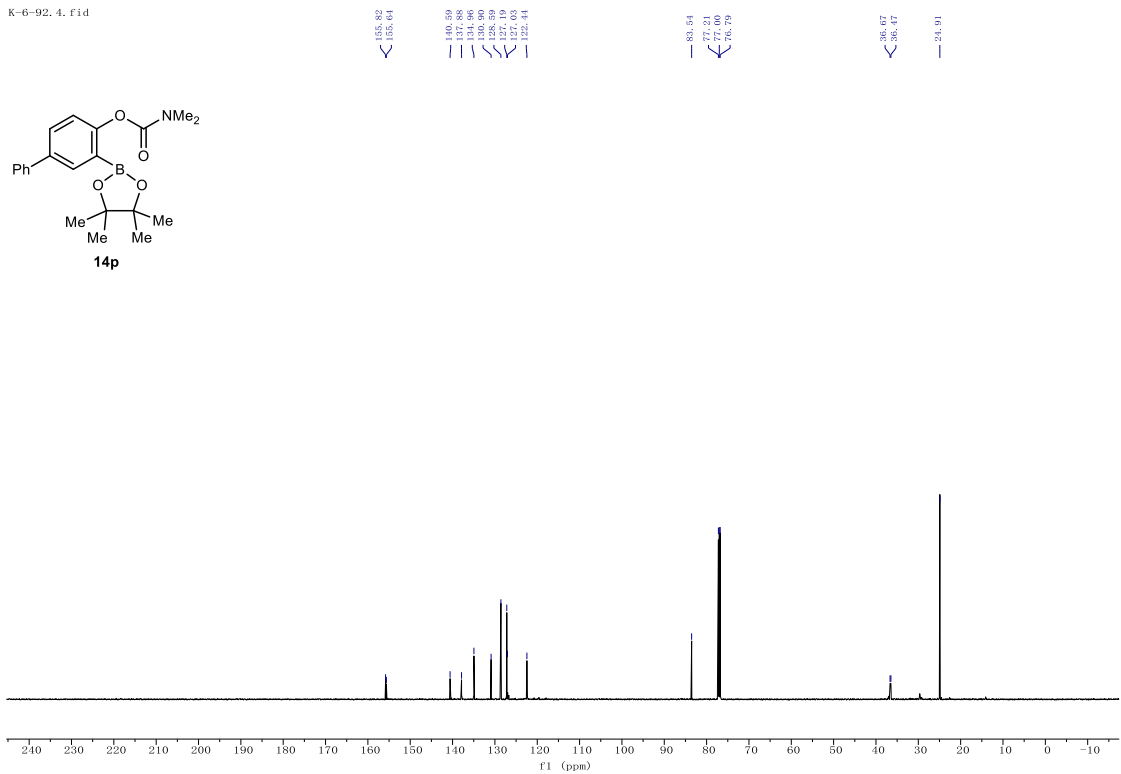

K-6-85.1.fid

7.89  
7.87  
7.56  
7.55  
7.54  
7.42  
7.41  
7.16  
7.08  
7.05

3.09  
2.98  
2.94  
2.31  
1.25

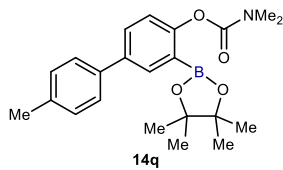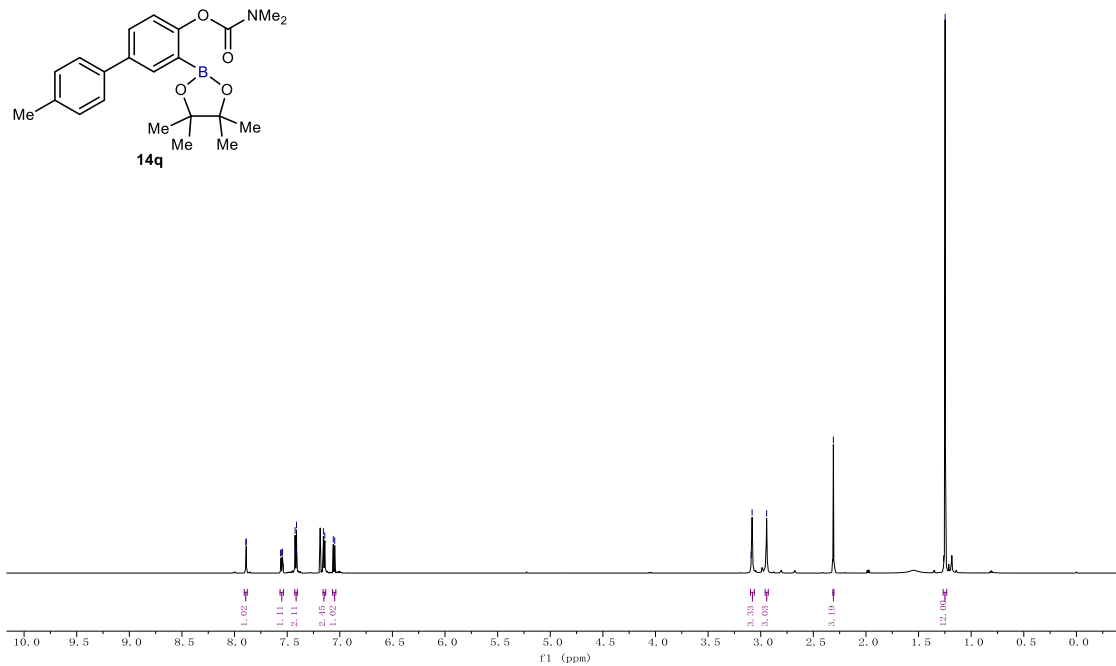

2023-1-15342.fid  
K-6-85

155.67  
155.61  
137.79  
137.70  
136.73  
136.73  
136.72  
136.63  
135.81  
132.39

83.51  
77.56 CDCl3  
77.00 CDCl3  
76.48 CDCl3

38.67  
38.76  
21.92

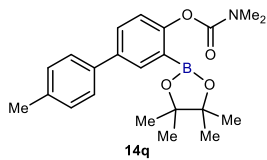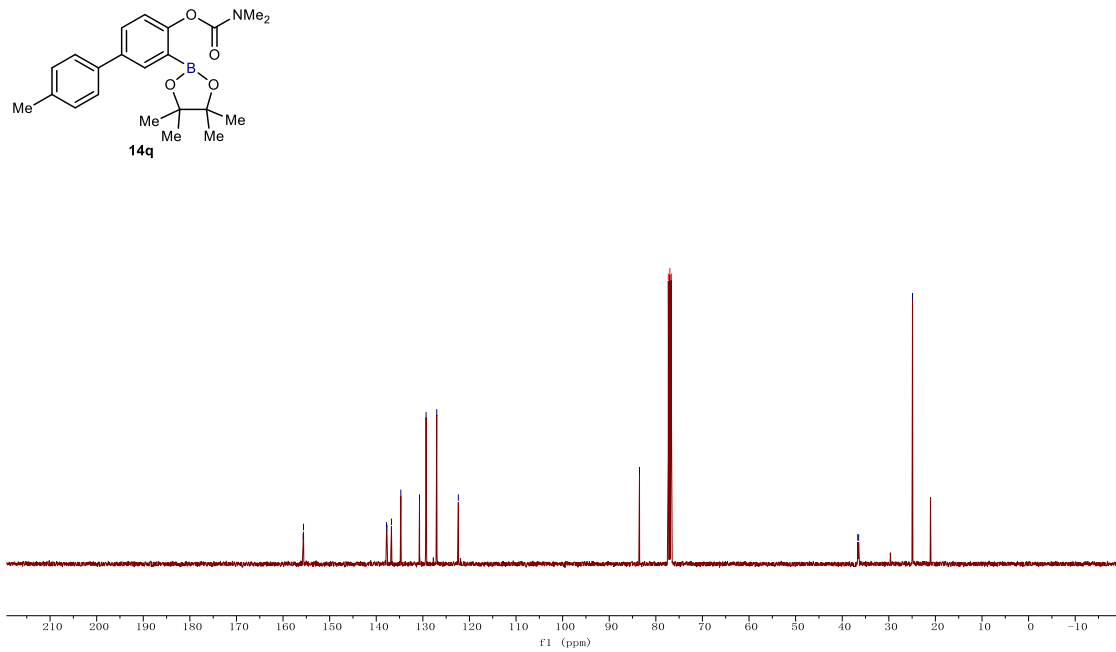

2023-1-15048.fid  
K-6-127

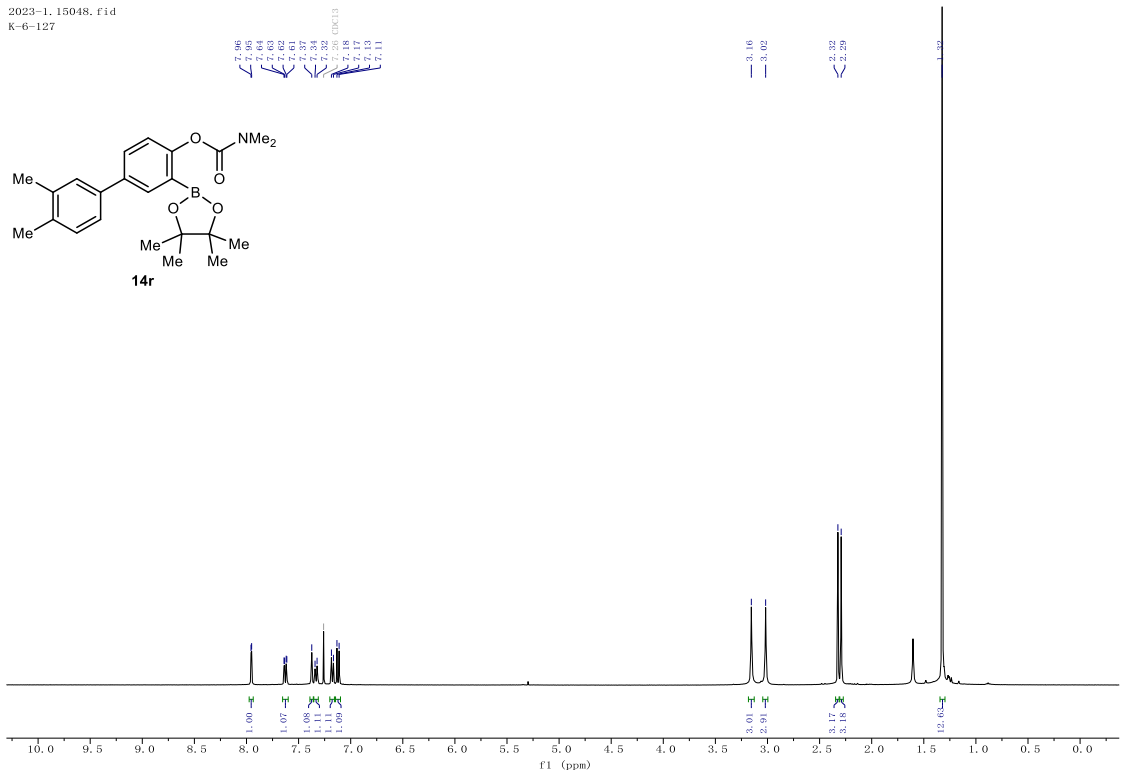

2023-1-15348.fid  
K-6-127

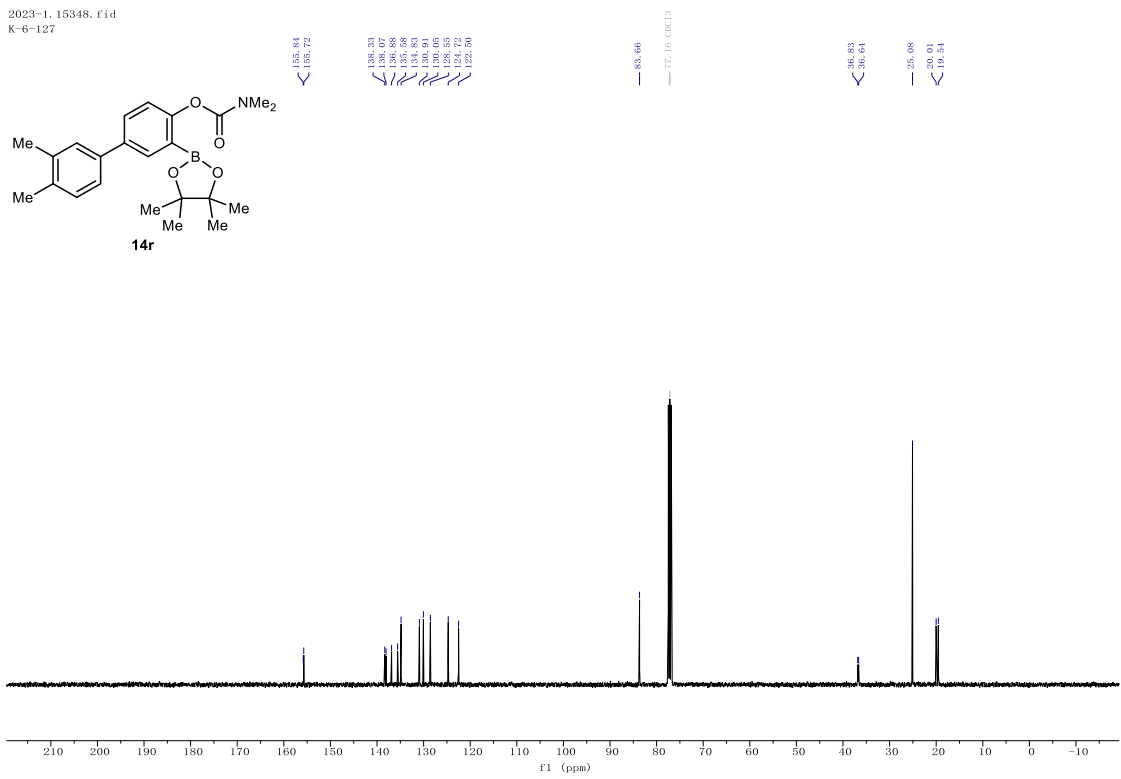

K-6-86. 1. fid

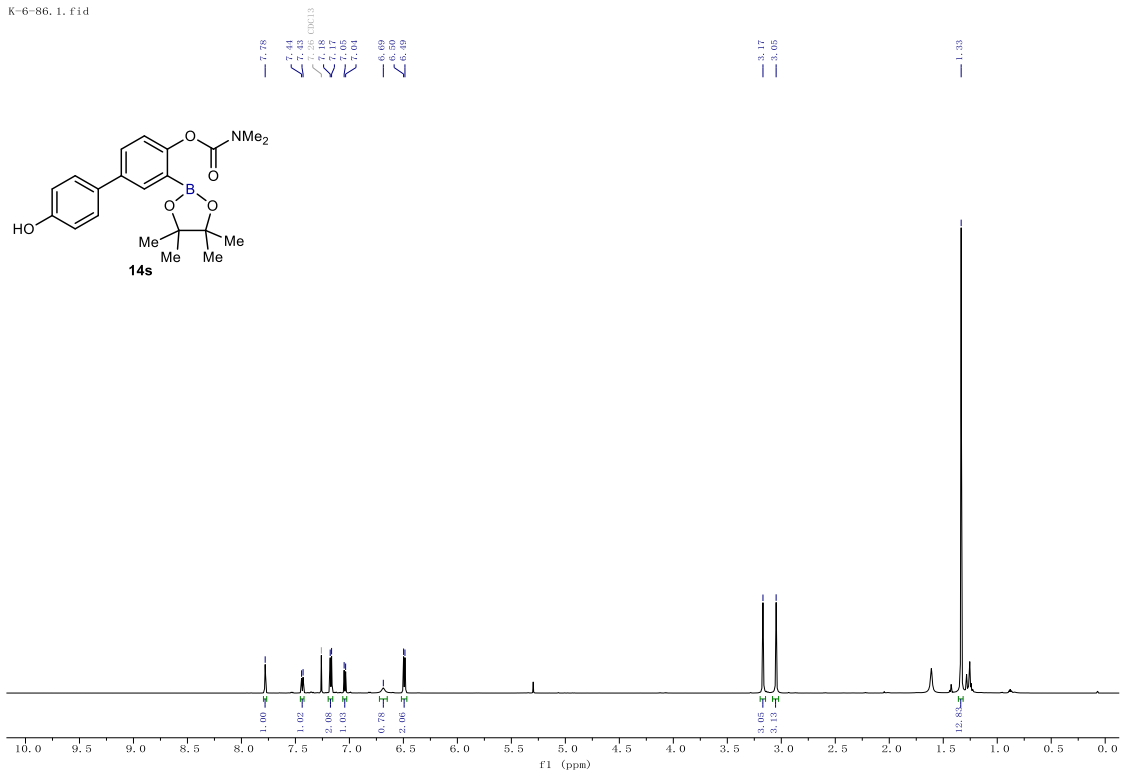

K-6-86. 2. fid

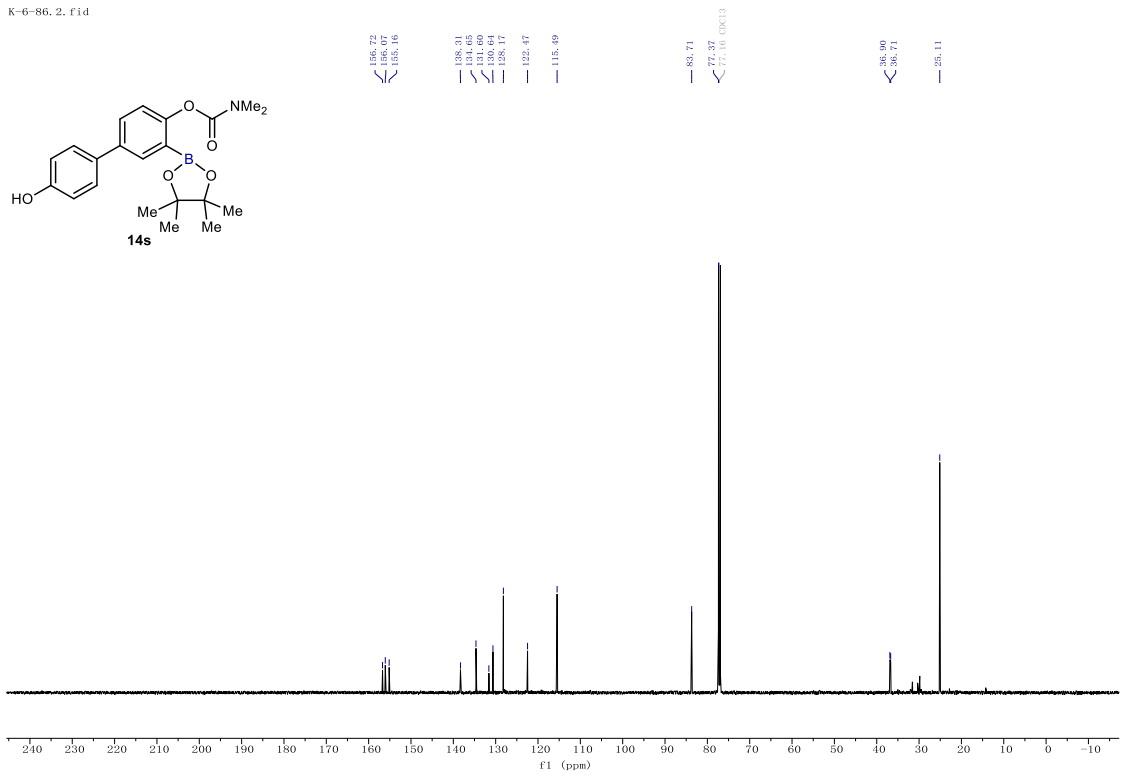

K-6-16P. 1. fid

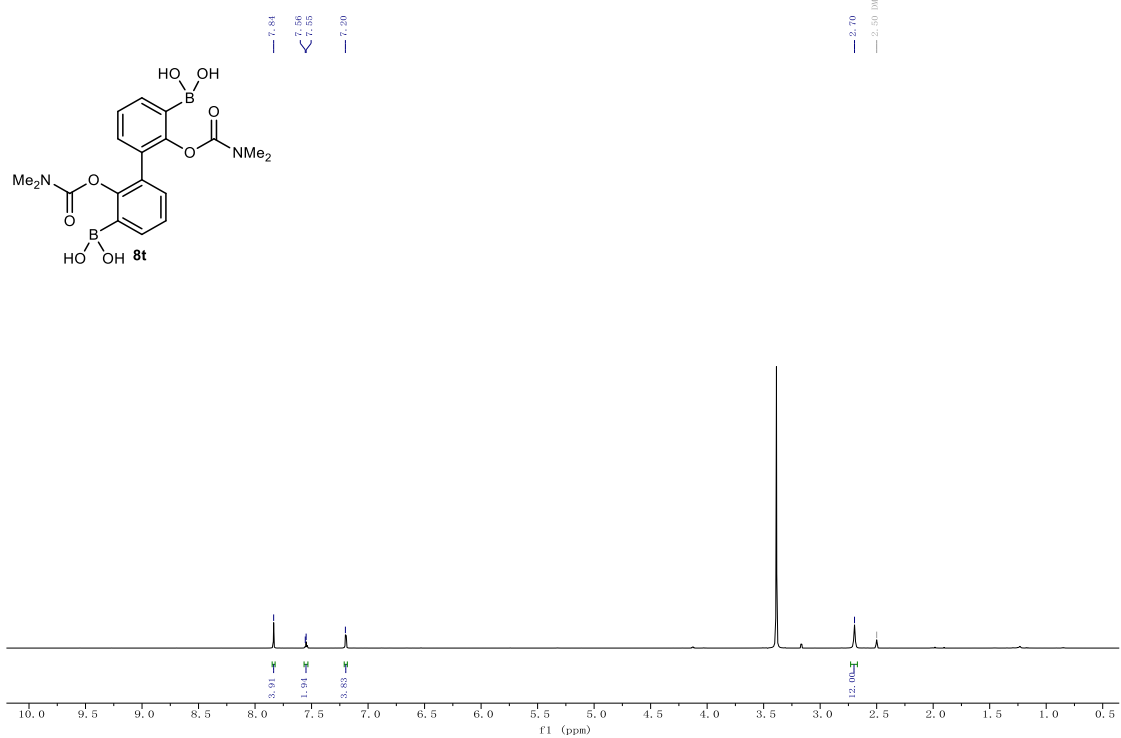

2023-1.15337. fid  
K-6-4-6

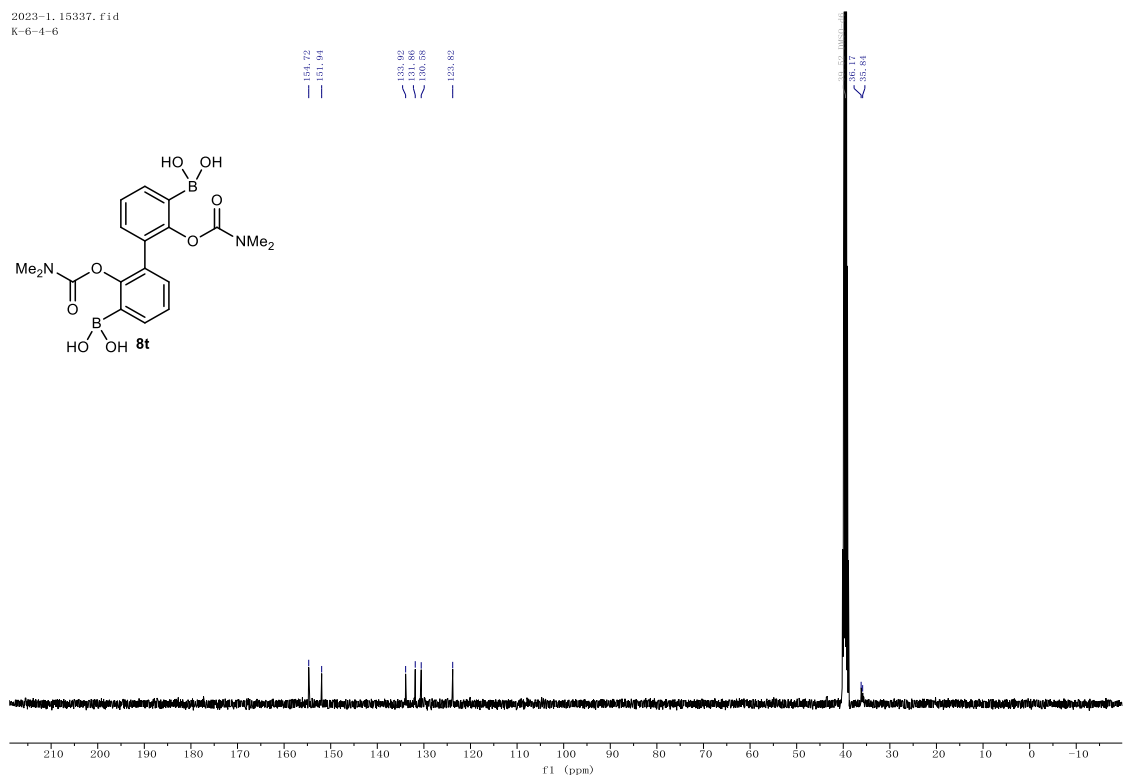

K-6-47.1.fid

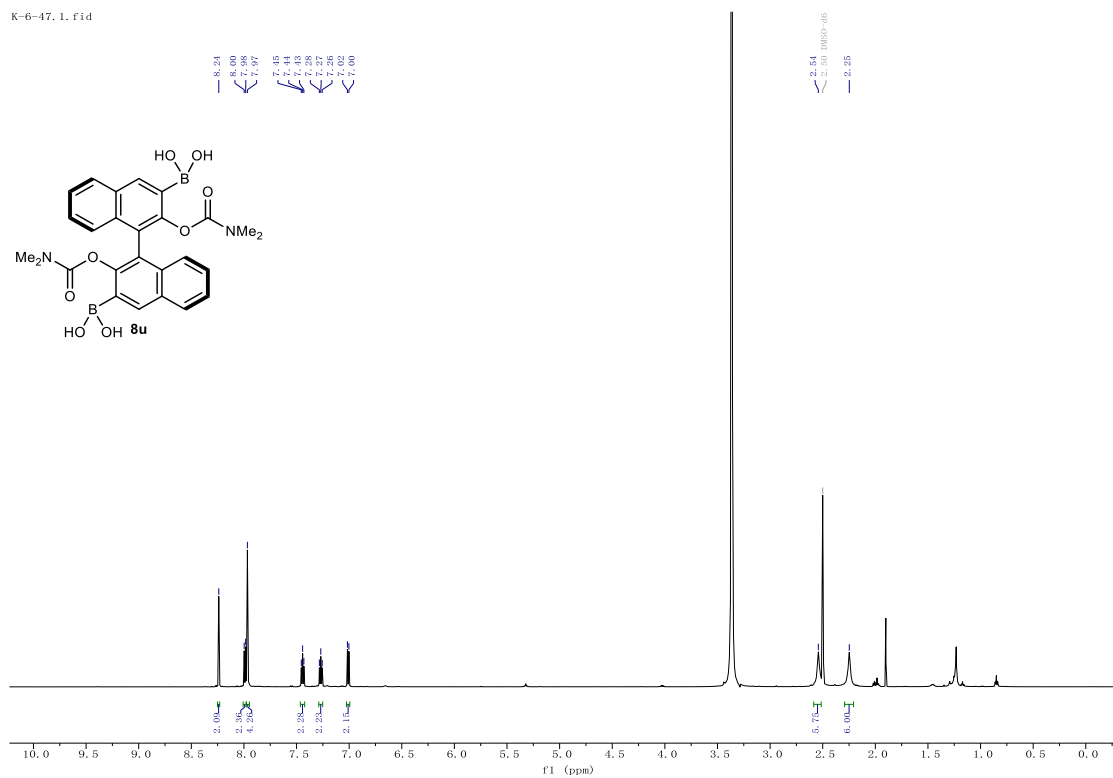

K-6-47.3.fid

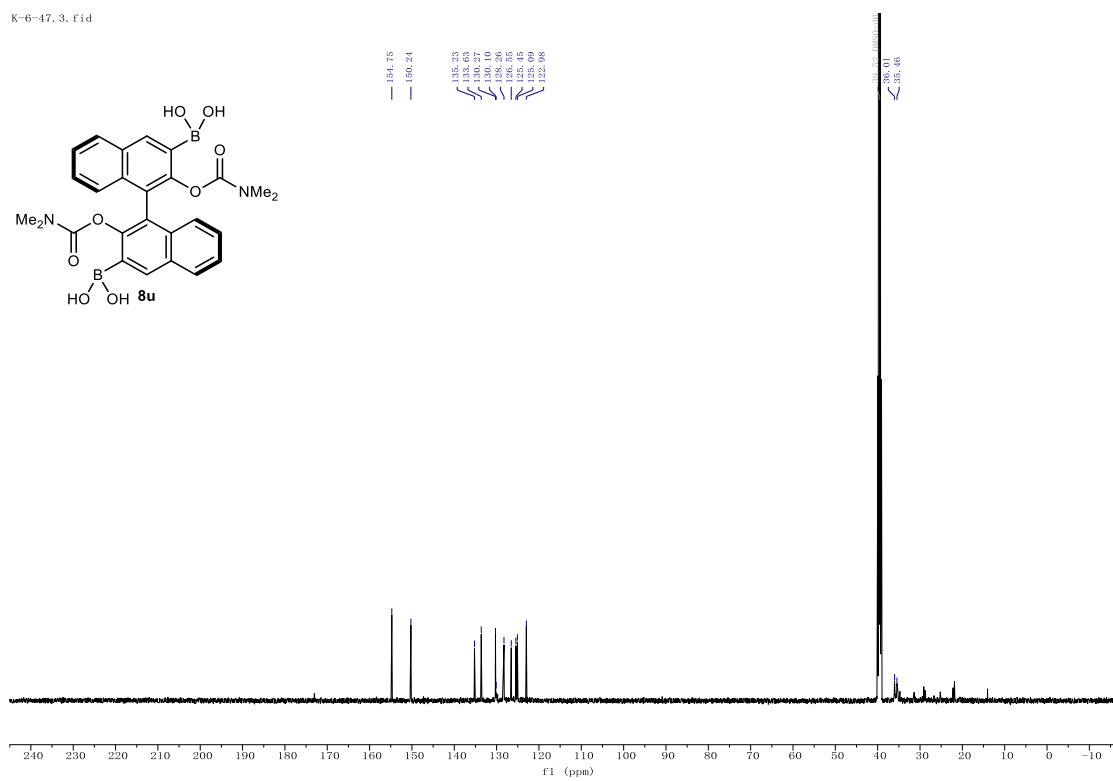





K-6-109.1.fid

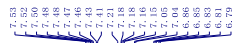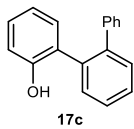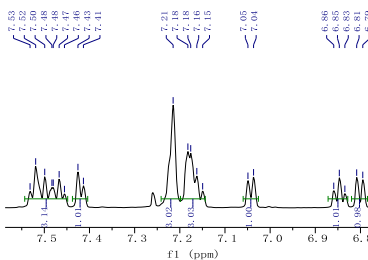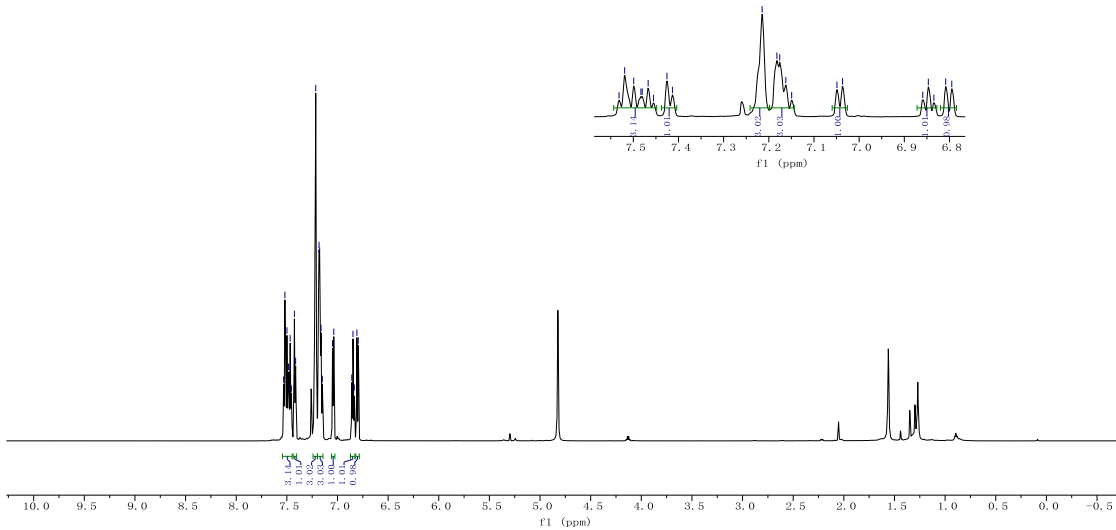

2023-1-15345.fid  
K-6-109

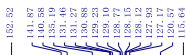

77.16 CDCl3

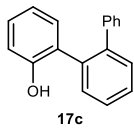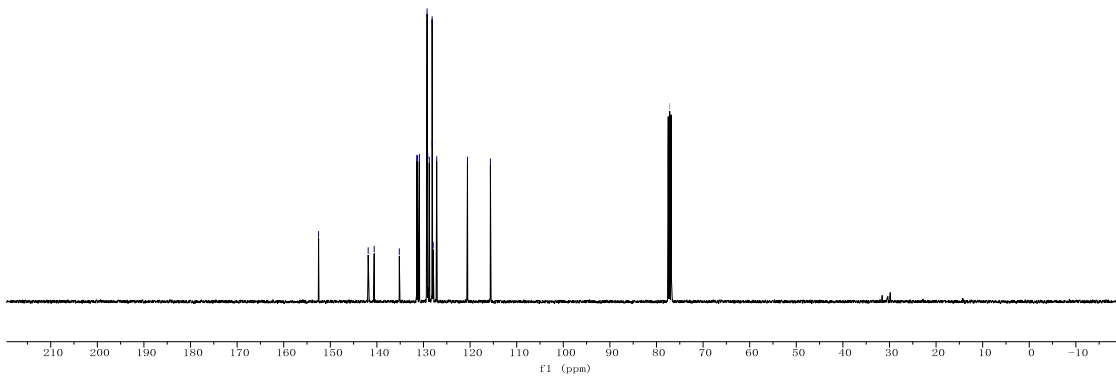





## X. Reference

---

- 1 D. V. Patil, K. Ramesh, H. Y. Kim and K. Oh, Visible-light-promoted aryl cation formation: aromatic SN1 reactions of areneazo-2-(2-nitro)propanes, *Org. Lett.*, 2023, **25**, 7204–7208.
- 2 X. Xiong, R. Zhu, L. Huang, S. Chang and J. Huang, Direct *ortho* arylation of anisoles *via* the formation of four-membered lithiumcycles/palladacycles, *Synlett*, 2017, **28**, 2046–2050.
- 3 J. M. Quibell, G. Duan, G. J. P. Perry, I. Larrosa, Decarboxylative Suzuki–Miyaura coupling of (hetero)aromatic carboxylic acids using iodine as the terminal oxidant, *Chem. Commun.*, 2019, **55**, 6445–6448.
- 4 S. M. Maddox, A. N. Dinh, F. Armenta, J. Um and J. L. Gustafson, The catalyst-controlled regiodivergent chlorination of phenol, *Org. Lett.*, 2016, **18**, 5476–5479.
- 5 T. Tu, Z. Sun, W. Fang, M. Xu and Y. Zhou, Robust acenaphthoimidazolylidene palladium complexes: highly efficient catalysts for Suzuki–Miyaura couplings with sterically hindered substrates, *Org. Lett.*, 2012, **14**, 4250–4253.
- 6 Y. Nakamura, N. Yoshikai, L. Ilies and E. Nakamura, Nickel-catalyzed monosubstitution of polyfluoroarenes with organozinc reagents using alkoxydiphosphine ligand, *Org. Lett.*, 2012, **14**, 3316–3319.
- 7 L. K. G. Ackerman, M. M. Lovell and D. J. Weix, Multimetallic catalysed cross-coupling of aryl bromides with aryl triflates, *Nature*, 2015, **524**, 454–457.
- 8 K. Kang, L. Huang and D. J. Weix, Sulfonate versus sulfonate: nickel and palladium multimetallic cross-electrophile coupling of aryl triflates with aryl tosylates, *J. Am. Chem. Soc.*, 2020, **142**, 10634–10640.
- 9 J. Ahmed, S. Chakraborty, A. Jose, S. P and S. K. Mandal, Integrating organic lewis acid and redox catalysis: the phenalenyl cation in dual role, *J. Am. Chem. Soc.*, 2018, **140**, 26, 8330–8339.
- 10 C. Liu, C-L. Ji, Z-X. Qin, X. Hong and M. Szostak, Synthesis of biaryls *via* decarbonylative palladium-catalyzed Suzuki–Miyaura cross-coupling of carboxylic acids, *iScience*, 2019, **19**, 749–759.
- 11 M. Arumugam, R. Venkatachalam and S. Sethuraman, Synthesis and structures of (-)-menthyl and (+)-neomenthyl substituted enantiopure bis(1,2,3-triazol-5-ylidene)PdI<sub>2</sub> complexes and PEPPSI type (1,2,3-triazol-5-ylidene)(pyridine)PdI<sub>2</sub> complexes. Comparison of catalytic activities for C-C coupling, *J. Organometal. Chem.*, 2015, **799-800**, 115–121.
- 12 X. Luo, D. Yang, X. He, S. Wang, D. Zhang, J. Xu, C-W. Pao, J-L. Chen, J-F. Lee, H. Cong, Y. Lan, H. Alhumade, J. Cossy, R. Bai, Y-H. Chen, H. Yi and A. Lei, Valve turning towards on-cycle in cobalt-catalyzed Negishi-type cross-coupling, *Nat. Commun.*, 2023, **14**, 4638.
- 13 S. Thapa, P. Basnet, S. K. Gurunga and R. Giri, Copper-catalysed cross-coupling of arylzirconium reagents with aryl and heteroaryl iodides, *Chem. Commun.*, 2015, **51**, 4009–4012.
- 14 K. Shigemori, M. Watanabe, J. Kong, K. Mitsudo, A. Wakamiya, H. Mandai and S. Suga, Iodide-mediated or iodide-catalyzed demethylation and Friedel–Crafts C–H borylative cyclization leading to thiophene-fused 1,2-oxaborine derivatives, *Org. Lett.*, 2019, **21**, 2171–2175.
- 15 M. R. Yadav, M. Nagaoka, M. Kashihara, R-L. Zhong, T. Miyazaki, S. Sakaki and Y. Nakaod, The Suzuki–Miyaura coupling of nitroarenes, *J. Am. Chem. Soc.*, 2017, **139**, 9423–9426.
- 16 K. Yuki, M-B. Dorian and P. Herbert, The regioselective arylation of 1,3-benzodioxoles, *Adv. Syn. Catal.*, 2022, **364**, 679–688.
- 17 Y. Kikuchi, Y. Hasegawa and M. Matsumoto, Reaction of *o*-benzoquinone bisacetals with organolithiums. a novel route to substituted veratroles, *Tetra. Lett.*, 1982, **23**, 2199–2202.
- 18 C. Wu, H-G. Cheng, R. Chen, H. Chen, Z-S. Liu, J. Zhang, Y. Zhang, Y. Zhu, Z. Geng and Q. Zhou, Convergent syntheses of 2,3-dihydrobenzofurans *via* a Catellani strategy, *Org. Chem. Front.*, 2018, **5**, 2533–2536.
- 19 P. Ricci, K. Kramer and I. Larrosa, Tuning reactivity and site selectivity of simple arenes in C-H activation: *ortho*-arylation of anisoles *via* arene-metal  $\pi$ -complexation, *J. Am. Chem. Soc.*, 2014, **136**, 18082–18086.
- 20 N. Schröder, J. Wencel-Delord and F. Glorius, High-yielding, versatile, and practical [Rh(III)Cp\*]-catalyzed *ortho* bromination and iodination of arenes, *J. Am. Chem. Soc.*, 2012, **134**, 8298–8301.
- 21 K. W. Quasdorf, M. Riener, K. V. Petrova and N. K. Garg, Suzuki–Miyaura coupling of aryl

- 
- carbamates, carbonates, and sulfamates, *J. Am. Chem. Soc.*, 2009, **131**, 17748–17749.
- 22 J. Tanaka, Y. Nagashima and K. Tanaka, Rhodium(III)-catalyzed oxidative *ortho*-olefination of phenyl carbamates with alkenes: elucidation of acceleration mechanisms by using an unsubstituted cyclopentadienyl ligand, *Org. Lett.*, 2020, **22**, 7181–7186.
- 23 C. Zhang and Y. Rao, Weak coordination promoted regioselective oxidative coupling reaction for 2,2'-difunctional biaryl synthesis in hexafluoro-2-propanol, *Org. Lett.*, 2015, **17**, 4456–4459.
- 24 X. Zhao, C. S. Yeung and V. M. Dong, Palladium-catalyzed *ortho*-arylation of *o*-phenylcarbamates with simple arenes and sodium persulfate, *J. Am. Chem. Soc.*, 2010, **132**, 5837–5844.
- 25 A. John and K. M. Nicholas, Palladium catalyzed C-H functionalization of *O*-arylcarbamates: selective *ortho*-bromination using NBS, *J. Org. Chem.*, 2012, **77**, 5600–5605.
- 26 T-J. Gong, B. Xiao, Z-J. Liu, J. Wan, J. Xu, D-F. Luo, Y. Fu and L. Liu, Rhodium-catalyzed selective C-H activation/olefination of phenol carbamates, *Org. Lett.*, 2011, **13**, 3235–3237.
- 27 H. Ma, T. Wang, C. Gao, G. Li, M. Zhang and Q. Wang, Pd(II)/Ag(I)-cocatalyzed *ortho* direct arylation of *o*-phenyl carbamates with pinacol arylboronates, *Org. Chem. Front.*, 2019, **6**, 1409–1413.
- 28 S. Sharma, A. Kim, E. Park, J. Park, M. Kim, J. H. Kwak, S. H. Lee, Y. H.oon Jung and I. S. Kim, Palladium-catalyzed decarboxylative acylation of *o*-phenyl carbamates with  $\alpha$ -oxocarboxylic acids at room temperature, *Adv. Syn. Catal.*, 2013, **355**, 667–672.
- 29 Y. Sumida, R. Harada, T. Kato-Sumida, K. Johmoto, H. Uekusa and T. Hosoya, Boron-selective biaryl coupling approach to versatile dibenzoxaborins and application to concise synthesis of defucogilvocarcin M, *Org. Lett.*, 2014, **16**, 6240–6243.
- 30 Q. J. Zhou, K. Worm and R. E. Dolle, 10-hydroxy-10,9-boroxarophenanthrenes: versatile synthetic intermediates to 3,4-benzocoumarins and triaryls, *J. Org. Chem.*, 2004, **69**, 5147–5149.
- 31 Y. Sumida, R. Harada, T. Sumida, K. Johmoto, H. Uekusa and T. Hosoya, Synthesis of dibenzofurans by Cu-catalyzed deborylative ring contraction of dibenzoxaborins, *Org. Lett.*, 2020, **22**, 6687–6691
- 32 G. Wang, L. Liu, H. Wang, Y-S. Ding, J. Zhou, S and Mao, P. Li, *N,B*-bidentate boryl ligand-supported iridium catalyst for efficient functional-group-directed C-H borylation, *J. Am. Chem. Soc.*, 2017, **139**, 91–94.
- 33 B. Ghaffari, S. M. Preshlock, D. L. Plattner, R. J. Staples, P. E. Maligres, S. W. Krska, R. E. Maleczka and M. R. Smith, Silyl phosphorus and nitrogen donor chelates for homogeneous *ortho* borylation catalysis, *J. Am. Chem. Soc.*, 2014, **136**, 14345–14348.
- 34 W-T Zhao, Z-Q. Lu, H. Zheng, X-S. Xue and D. Zhao, Rhodium-catalyzed 2-arylphenol-derived six-membered silacyclization: straightforward access toward dibenzooxasilines and silicon-containing planar chiral metallocenes, *ACS Catal.*, 2018, **8**, 7997–8005.
- 35 S. Duan, Y. Xu; X. Zhang and X. Fan, Synthesis of 2,2'-biphenols through direct C(sp<sup>2</sup>)-H hydroxylation of [1,1'-biphenyl]-2-ols, *Chem. Commun.*, 2016, **52**, 10529–10532.
